# Supplementary material
Source: Royal Society of Chemistry journal article supplement (doi:10.1039/d5va00496a)
Supplement: d5va00496a1.pdf [file d5va00496a1.pdf]

## Supplementary Information for:

Fate of organic contaminants in electrochemical nitrogen recovery from urine

Anna Kogler<sup>1</sup>, William A. Tarpeh<sup>1,2\*</sup>

<sup>1</sup> Department of Civil and Environmental Engineering, Stanford University, Stanford, CA, 94305, USA

<sup>2</sup> Department of Chemical Engineering, Stanford University, Stanford, CA, 94305, USA

\*Corresponding author, Email: [wtarpeh@stanford.edu](mailto:wtarpeh@stanford.edu). Address: 443 Via Ortega, Room 387, Stanford CA, 94305. Telephone: 650-497-1324

Pages: 74

Figures: 27

Tables: 31

|       |                                                                                                                                                 |    |
|-------|-------------------------------------------------------------------------------------------------------------------------------------------------|----|
| 1     | Materials and Methods.....                                                                                                                      | 11 |
| 1.1   | Urine Characterization.....                                                                                                                     | 11 |
|       | Table S1-1. Average composition of influent urine across all experiments.....                                                                   | 11 |
| 1.2   | Chemicals .....                                                                                                                                 | 12 |
| 1.3   | Operation of Electrochemical Nitrogen Recovery Processes.....                                                                                   | 13 |
|       | Figure S1-1. Full-cell voltage observed during ECS, ED, and BPED experiments. ....                                                              | 14 |
|       | Table S1-2. Sample collection and storage protocol .....                                                                                        | 15 |
| 1.4   | Pharmaceutical Analysis .....                                                                                                                   | 15 |
| 1.4.1 | Sample Preparation .....                                                                                                                        | 15 |
| 1.4.2 | Target Analysis .....                                                                                                                           | 15 |
|       | Table S1-3. Target pharmaceuticals, their properties, and internal standards. ....                                                              | 16 |
|       | Table S1-4. Mobile phase gradient for LC-MS method for target pharmaceutical analysis. ....                                                     | 17 |
|       | Table S1-5. Mass spectrometry parameters for target pharmaceutical analysis. ....                                                               | 17 |
| 1.4.3 | Suspect Screening .....                                                                                                                         | 18 |
|       | Table S1-6. Mobile phase gradient for LC-HRMS method for non-target analysis.....                                                               | 18 |
|       | Figure S1-2. Illustration of suspect screening analysis workflow. ....                                                                          | 18 |
|       | Table S1-7. Parameters for data pretreatment using Proteowizard MSconvert.....                                                                  | 20 |
|       | Table S1-8. Parameters for feature finding in patRoom. ....                                                                                     | 20 |
|       | Table S1-9. Parameters for feature grouping and feature group filtering in patRoom. ....                                                        | 21 |
|       | Table S1-10. Parameters for componentization and generating MS peak lists in patRoom.....                                                       | 22 |
|       | Table S1-11. Parameters for annotation with formulas and compounds in patRoom. ....                                                             | 23 |
| 1.4.4 | Metrics for Pharmaceutical Fate .....                                                                                                           | 23 |
|       | Table S1-12. Existing water reuse guidelines for pharmaceuticals. ....                                                                          | 23 |
|       | Table S1-13. Samples for calculation of pharmaceutical fold changes. ....                                                                       | 24 |
|       | Figure S1-3. Samples for calculating fold changes of pharmaceuticals and features detected during suspect screening for ECS, ED, and BPED. .... | 24 |
| 1.5   | Disinfection Byproduct Analysis .....                                                                                                           | 25 |
|       | Table S1-14. Summary of disinfection byproducts quantified in this study with limits of detection (LODs). ....                                  | 26 |
| 2     | Results & Discussion .....                                                                                                                      | 27 |
| 2.1   | Nitrogen Removal and Recovery Performance.....                                                                                                  | 27 |
|       | Figure S2-1. pH values observed for ECS, ED, and BPED.....                                                                                      | 27 |
|       | Table S2-1. Average composition of final treated urine across all experiments for each process. .                                               | 28 |
|       | Figure S2-2. TAN removal and recovery efficiencies over time for ECS, ED, and BPED. ....                                                        | 28 |

|     |                                                                                                                                                                                                                                                                |    |
|-----|----------------------------------------------------------------------------------------------------------------------------------------------------------------------------------------------------------------------------------------------------------------|----|
|     | Table S2-2. p-values for comparison between final TAN fold changes and removal/recovery efficiencies across processes using two-sided t-tests.....                                                                                                             | 29 |
|     | Figure S2-3. Total ammonia nitrogen (TAN) mass balances for ECS, ED, and BPED. ....                                                                                                                                                                            | 29 |
| 2.2 | Fate of Organic Contaminants.....                                                                                                                                                                                                                              | 29 |
|     | Table S2-3. Summary of suspect screening workflow and validation with target analysis. ....                                                                                                                                                                    | 29 |
|     | Figure S2-4. Mass balance on target pharmaceuticals for ECS, ED, and BPED. ....                                                                                                                                                                                | 30 |
|     | Table S2-4. Target pharmaceuticals, their fates (enrichment and removal ratios, ER and RR), and their properties. ....                                                                                                                                         | 31 |
|     | Figure S2-5. Volcano plots for enrichment ratio for ED and BPED as calculated for each of the target pharmaceuticals and all features detected during suspect screening. ....                                                                                  | 32 |
|     | Figure S2-6. Volcano plots for removal ratio for ECS, ED, and BPED as calculated for each of the target pharmaceuticals and all features detected during suspect screening. ....                                                                               | 33 |
|     | Table S2-5. p-values for comparison between ratios calculated for processes based on all suspect data and feature intensity for targets determined via suspect screening. ....                                                                                 | 33 |
|     | Figure S2-7. Average enrichment and removal ratios calculated for all features detected during suspect screening, for features identified as target compounds during suspect screening and for target compounds quantified separately via target analysis..... | 34 |
|     | Figure S2-8. Enrichment ratio vs. removal ratio for ECS, ED, and BPED for all features detected during suspect screening. ....                                                                                                                                 | 35 |
|     | Table S2-6. p-values for comparison between ratios calculated from target and suspect screening data for each process. ....                                                                                                                                    | 35 |
|     | Table S2-7. p-values for comparison between ratios calculated for target data for each process using different calculation methods.....                                                                                                                        | 36 |
| 2.3 | Product Purity.....                                                                                                                                                                                                                                            | 36 |
|     | Figure S2-9. Disinfection byproducts detected in anode chambers.....                                                                                                                                                                                           | 36 |
|     | Figure S2-10. Disinfection byproducts detected in influent and treated urine. ....                                                                                                                                                                             | 37 |
|     | Figure S2-11. Photo of bipolar membrane after use during BPED experiment. ....                                                                                                                                                                                 | 40 |
|     | Figure S2-12. Chloride concentrations in all chambers for ECS, ED, and BPED. ....                                                                                                                                                                              | 40 |
|     | Figure S2-13. Sulfate concentrations in all chambers for ECS, ED, and BPED. ....                                                                                                                                                                               | 41 |
|     | Figure S2-14. Phosphate concentrations in all chambers for ECS, ED, and BPED.....                                                                                                                                                                              | 41 |
| 2.4 | Identification of Priority Compounds.....                                                                                                                                                                                                                      | 42 |
|     | Figure S2-15. Fraction of all detected feature groups identified during suspect screening.....                                                                                                                                                                 | 42 |
|     | Figure S2-16. Fraction of priority compounds (enrichment ratio less than 0.5 or greater than 2, removal ratio less than 0.5 or greater than 2, and p-value less than 0.05) and fraction of non-detects (either influent only or effluent only). ....           | 42 |
|     | Figure S2-17. Fraction of priority feature groups identified during suspect screening. ....                                                                                                                                                                    | 43 |
|     | Table S2-8. Priority compounds identified through suspect screening. ....                                                                                                                                                                                      | 43 |

|                                                                                                                                                                                                                                                       |    |
|-------------------------------------------------------------------------------------------------------------------------------------------------------------------------------------------------------------------------------------------------------|----|
| Table S2-9. Properties of identified compounds categorized as priority compounds based on ER for multiple processes. ....                                                                                                                             | 44 |
| Table S2-10. Properties of identified compounds categorized as priority compounds based on RR for BPED and ECS.....                                                                                                                                   | 46 |
| Table S2-11. Uses of identified priority compounds, as indicated on PubChem. ....                                                                                                                                                                     | 47 |
| Figure S2-18. Extreme enrichment and removal ratios for priority features that were identified for each process. ....                                                                                                                                 | 48 |
| 2.5 Mechanistic Understanding of Compound Fate .....                                                                                                                                                                                                  | 50 |
| Figure S2-19. Relationships between compound properties and enrichment ratio for priority compounds. ....                                                                                                                                             | 50 |
| Figure S2-20. Relationships between compound properties and removal ratio for priority compounds. ....                                                                                                                                                | 52 |
| Table S2-12. Spearman correlation results for relationships between compound properties and fates for priority compounds. ....                                                                                                                        | 54 |
| Table S2-13. Slopes, intercepts (Int), and R <sup>2</sup> for relationships between compound properties and fates for priority compounds. ....                                                                                                        | 56 |
| Figure S2-21. Relationships between compound properties and enrichment ratio for all identified compounds. ....                                                                                                                                       | 58 |
| Figure S2-22. Relationships between compound properties and removal ratio for all identified compounds. ....                                                                                                                                          | 60 |
| Table S2-14. Spearman correlation results for relationships between compound properties and fates for all identified compounds. ....                                                                                                                  | 62 |
| Table S2-15. Slopes, intercepts (Int), and R <sup>2</sup> for relationships between compound properties and fates for all identified compounds.....                                                                                                   | 64 |
| Figure S2-23. Relationships between compound properties and enrichment ratio for identified compounds that showed significant (p < 0.05) changes in feature intensity from influent to effluent or product. ....                                      | 66 |
| Figure S2-24. Relationships between compound properties and removal ratio for identified compounds that showed significant (p < 0.05) changes in feature intensity from influent to effluent or product. ....                                         | 68 |
| Table S2-16. Spearman correlation results for relationships between compound properties and fates for identified compounds that showed significant (p < 0.05) changes in feature intensity from influent to effluent or product. ....                 | 70 |
| Table S2-17. Slopes, intercepts (Int), and R <sup>2</sup> for relationships between compound properties and fates for identified compounds that showed significant (p < 0.05) changes in feature intensity from influent to effluent or product. .... | 72 |
| References.....                                                                                                                                                                                                                                       | 74 |

# 1 Materials and Methods

## 1.1 Urine Characterization

Total ammonia nitrogen (TAN) was measured via a phenol-based colorimetric method by segmented flow analysis with a SEAL Analytical AA500 AutoAnalyzer (Mequon, WI). Anion concentrations (i.e., fluoride, chloride, nitrite, bromide, nitrate, phosphate, and sulfate) were measured via anion chromatography (4.5 mM carbonate/0.8 mM bicarbonate eluent at 1.0 mL/min, AS23-4 $\mu$ m column at 30 °C, suppressed) and cation concentrations (i.e., lithium, sodium, ammonium, potassium, magnesium, calcium) were measured via cation chromatography (4 mM tartaric acid and 2 mM oxalic acid eluent at 1.0 mL/min, IonPac SCS1 column at 30°C, unsuppressed) on a Thermo Fisher Scientific Dionex ICS-6000 system (Waltham, MA). Samples were acidified with 2 M sulfuric acid prior to TAN and cation analysis to prevent ammonia volatilization and allow accurate quantification of TAN. pH of raw samples was measured with a pH/conductivity meter (FiveEasy F20, Mettler Toledo, Columbus, OH). Pharmaceutical and DBP concentrations in urine were measured as described below (Sections S1.4 and S1.5).

*Table S1-1. Average composition of influent urine across all experiments. Note that for atenolol, concentrations were lower for BPED experiments ( $2.18 \pm 0.54 \mu\text{g/L}$ ) than ED and ECS experiments ( $19.3 \pm 2.4 \mu\text{g/L}$ ), suggesting that atenolol may have degraded or precipitated during storage. Diclofenac concentrations tended to be more variable within analytical and experimental replicates across all processes.*

|                                                     | <b>Urine</b>    |
|-----------------------------------------------------|-----------------|
| TAN (mg/L)                                          | $3,280 \pm 360$ |
| <b>Cations (mg/L)</b>                               |                 |
| Na <sup>+</sup>                                     | $1,090 \pm 42$  |
| K <sup>+</sup>                                      | $1,150 \pm 190$ |
| Mg <sup>2+</sup>                                    | $0.418 \pm 1.2$ |
| Ca <sup>2+</sup>                                    | -               |
| <b>Anions (mg/L)</b>                                |                 |
| SO <sub>4</sub> <sup>2-</sup>                       | $548 \pm 63$    |
| Cl <sup>-</sup>                                     | $1,860 \pm 70$  |
| PO <sub>4</sub> <sup>3-</sup>                       | $462 \pm 14$    |
| <b>Other</b>                                        |                 |
| pH                                                  | $9.32 \pm 0.08$ |
| COD (mg/L)                                          | $3,180 \pm 69$  |
| <b>Pharmaceuticals (<math>\mu\text{g/L}</math>)</b> |                 |
| Atenolol                                            | $15.0 \pm 7.9$  |
| Trimethoprim                                        | $20.1 \pm 3.5$  |
| Metoprolol                                          | $26.1 \pm 5.1$  |
| Bezafibrate                                         | $13.4 \pm 1.2$  |
| Propranolol                                         | $30.7 \pm 3.6$  |
| Carbamazepine                                       | $18.6 \pm 3.2$  |
| Diclofenac                                          | $28.9 \pm 19.6$ |

## 1.2 Chemicals

Sodium chloride and sodium sulfate used to prepare background electrolyte solutions were obtained from Acros Organics (ACS reagent, 99+%, Belgium) and Millipore Sigma (ACS Tracepur,  $\geq 99.0\%$ , Burlington, MA), respectively. Sulfuric acid used to prepare product recovery solutions was purchased from Sigma-Aldrich (ACS reagent, 95.0 – 98.0%, St. Louis, MO). A Milli-Q® IQ 7000 Ultrapure Lab Water System from EMD Millipore (Burlington, MA) was used to obtain 18.2M $\Omega$ -cm water used throughout all experiments.

Primary standards and deuterated internal standards of the pharmaceuticals used in this work were purchased from several suppliers including Sigma-Aldrich (St. Louis, MO), Santa Cruz Biotechnology (Dallas, TX), Toronto Research Chemicals (Toronto, Ontario), Alfa Aesar (Haverhill, MA), CDN Isotopes (Pointe-Claire, Canada), and ApexBio Technology LLC (Houston, TX). Optima LC-MS grade methanol, acetone, acetonitrile, water, and ammonium formate were obtained from Fisher Scientific (Waltham, MA). Ascorbic acid for quenching chlorine in samples prior to pharmaceutical and disinfection byproduct analysis<sup>104</sup> was obtained from Sigma-Aldrich (St. Louis, MO).

Reagents for segmented flow analysis of total ammonia nitrogen included: sodium citrate dihydrate (99.0–101.0 %, Avantor Performance Materials), sodium nitroferricyanide dihydrate (ACS grade, Acros Organics, Belgium), sodium hydroxide (ACS reagent, 97.0%, Ricca Chemical), phenol (ACS reagent, 99.0%, Sigma-Aldrich), and sodium hypochlorite (reagent grade, 10–15% available chlorine, Sigma-Aldrich). Ammonium sulfate for preparation of segmented flow analysis standards was obtained from Sigma-Aldrich (ACS reagent,  $\geq 99.0\%$ , St. Louis, MO). Reagents for anion chromatography (4.5 mM carbonate/0.8 mM bicarbonate eluent) were obtained from Thermo Fisher Scientific (Waltham, MA). Reagents for cation chromatography (oxalic acid and tartaric acid) were purchased from Sigma-Aldrich (St. Louis, MO). Standards for anion and cation chromatography were obtained from Thermo Fisher Scientific (Waltham, MA).

Reagents for disinfection byproduct analysis included: GC-grade methyl tert-butyl ether (puriss. p.a.,  $\geq 99.5\%$ , Sigma Aldrich, St. Louis, MO), Optima HPLC/GC grade methylene chloride (Fisher Scientific, Waltham, MA), methanol (LC/MS grade,  $\geq 99.9\%$ , Fisher Chemical, Pittsburgh, PA), and sodium bicarbonate (Certified ACS, 99.7–100.3%, Fisher Chemical, Pittsburgh, PA). Standards for disinfection byproducts included: 1,2-dibromopropane (certified reference material, AccuStandard, New Haven, CT), EPA 552.2 haloacetic acids mix (certified reference material, Sigma Aldrich, St. Louis, MO), trihalomethanes mix (certified reference material, AccuStandard, New Haven, CT), M551.1B disinfectant by-products mix (certified reference material, AccuStandard, New Haven, CT), trichloroacetamide (HPLC grade, 98+%, Thermo Scientific Chemicals, Waltham, MA), and dichloroacetamide (98+%, Thermo Scientific Chemicals, Waltham, MA). Iodinated DBP standards, which were ultimately not quantified, were obtained from CanSyn Chemical Corporation (Toronto, Ontario).

### 1.3 Operation of Electrochemical Nitrogen Recovery Processes

ECS experiments were performed in a three-chambered, parallel-plate reactor similar to previous reports,<sup>19,105</sup> in which three square acrylic frames (internal dimensions: 8 x 8 x 1.9 cm<sup>3</sup>) were compressed between two larger square acrylic plates (10 x 10 x 1.9 cm<sup>3</sup>) to create three chambers (122 mL each, Figure 1A). Chambers 1 and 2 contained an anode and cathode, respectively, and were separated by a Selemion CMVN cation exchange membrane (AGC Engineering Co., Ltd., Japan). Chambers 2 and 3 were separated by a microporous polyethylene membrane (Aquastill, Netherlands). The anode was a Ti mesh coated with Ta<sub>2</sub>O<sub>5</sub> / IrO<sub>2</sub> mixed metal oxide (Magneto Special Anodes, Netherlands), and the cathode was a 304L stainless steel mesh (0.425 mm hole, 190 μm wire diameter, 42% open area; Yikai Industrial Scientific). Both electrodes had a 64 cm<sup>2</sup> geometric surface area and were positioned immediately adjacent to the cation exchange membrane. Urine was introduced into Chamber 1, 0.1 M NaCl solution was used as a background electrolyte in Chamber 2, and 1 M H<sub>2</sub>SO<sub>4</sub> was used to recover TAN in Chamber 3. Reactor components were separated by Buna-N gaskets (USA Sealing, Buffalo, NY) and held together by compression with stainless steel rods to prevent leaks.

ED experiments were performed in a three-chambered, parallel-plate reactor in which three square acrylic frames were compressed between two larger square acrylic plates (10 x 10 x 1.9 cm<sup>3</sup>) to create three chambers (Figure 1B). The outer chambers were the same size as those used for ECS (internal dimensions: 8 x 8 x 1.9 cm<sup>3</sup>, volume: 122 mL), while the middle chamber was thinner (internal dimensions: 8 x 8 x 0.95 cm<sup>3</sup>, volume: 61 mL). We selected a three-chambered reactor as a minimum reactor representative of ED reactor configurations without stacked chambers, which have been studied for urine treatment.<sup>106-110</sup> We used a thinner middle chamber, which contained urine, to reduce the contribution of solution resistance to overall electrochemical cell resistance and allow the reactor to operate longer within potentiostat limits. This reactor is comparable to three-chambered ECS by facilitating cation removal via migration across a cation exchange membrane although the ED reactor has the added ability to remove anions via migration across an anion exchange membrane. Chambers 2 and 3 were separated by a Selemion CMVN cation exchange membrane (AGC Engineering Co., Ltd., Japan). Chambers 1 and 3, the outermost chambers, contained an anode and cathode, respectively. The anode was a Ti mesh coated with Ta<sub>2</sub>O<sub>5</sub> / IrO<sub>2</sub> mixed metal oxide (Magneto Special Anodes, Netherlands), and the cathode was a 304L stainless steel mesh (0.425 mm hole, 190 μm wire diameter, 42% open area; Yikai Industrial Scientific); both electrodes had a 64 cm<sup>2</sup> geometric surface area. Chambers 1 and 2 were separated by an anion exchange membrane (AMI-7001S, Membranes International Inc., Ringwood, NJ). An electrode rinse solution of 0.1 M Na<sub>2</sub>SO<sub>4</sub> was recirculated in Chamber 1 (anode chamber); background electrolyte of 0.1 M NaCl was recirculated in Chamber 3 (concentrate/cathode chamber) when the experiment began. Urine was introduced and recirculated within Chamber 2 (diluate chamber). Reactor components were separated by Buna-N gaskets (USA Sealing, Buffalo, NY) and held together by compression with stainless steel rods to prevent leaks.

BPED experiments were performed in a four-chambered, parallel-plate reactor in which four square acrylic frames (internal dimensions: 8 x 8 x 1.9 cm<sup>3</sup>) were compressed between two larger square acrylic plates (10 x 10 x 1.9 cm<sup>3</sup>) to create four chambers (122 mL each, Figure 1C).

Chambers 1 and 2 were separated by a bipolar membrane (FumaTech Fumasep FBM, Fuel Cell Store, Bryan, TX). Chambers 2 and 3 were separated by a Selemion CMVN cation exchange membrane (AGC Engineering Co., Ltd., Japan), and Chambers 3 and 4 were separated by an anion exchange membrane (AMI-7001S, Membranes International Inc., Ringwood, NJ). Chambers 1 and 4, the outermost chambers, contained an anode and cathode, respectively. The anode was a Ti mesh coated with Ta<sub>2</sub>O<sub>5</sub> / IrO<sub>2</sub> mixed metal oxide (Magneto Special Anodes, Netherlands), and the cathode was a 304L stainless steel mesh (0.425 mm hole, 190 μm wire diameter, 42% open area; Yikai Industrial Scientific); both electrodes had a 64 cm<sup>2</sup> geometric surface area. An electrode rinse solution of 0.1 M Na<sub>2</sub>SO<sub>4</sub> was recirculated within Chamber 1 (anode chamber); background electrolyte of 0.1 M NaCl was recirculated in Chambers 3 and 4 (concentrate and cathode chambers, respectively) when the experiment began. Urine was introduced into Chamber 2 (diluate chamber). Reactor components were separated by Buna-N gaskets (USA Sealing, Buffalo, NY) and held together by compression with stainless steel rods to prevent leaks. This BPED configuration was chosen over other BPED variations<sup>111,112</sup> because it has been studied for urine treatment<sup>113,114</sup> and is most similar to conventional electro dialysis, which facilitates more direct comparison of the two processes (e.g., evaluating the impact of more rapid acidification of influent urine).

Samples were collected and stored as described in Table S1-2.

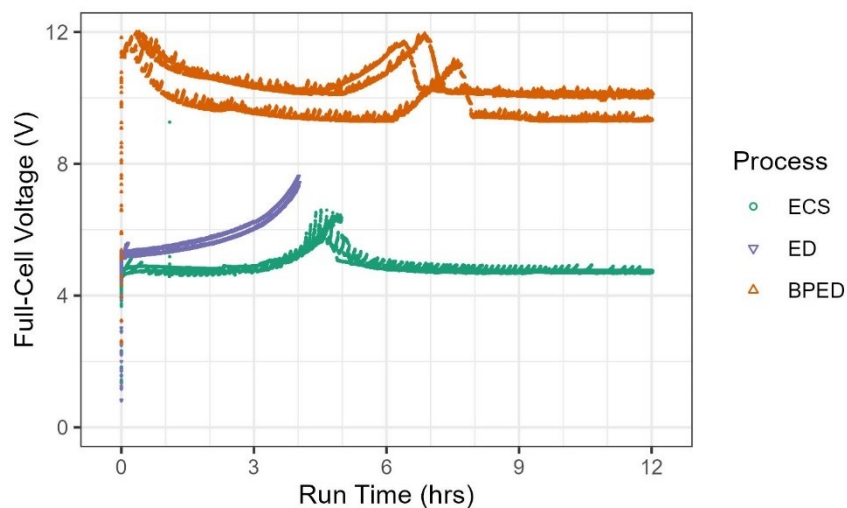

Figure S1-1. Full-cell voltage observed during ECS, ED, and BPED experiments. For ED, full-cell voltage increased rapidly as Chamber 2 became depleted of both anions and cations, causing high resistance.

Table S1-2. Sample collection and storage protocol

| Analyte         | Sampling Times (hrs)                                                      | Reactor Chambers                                               | Sample Volume | Sample Preservation                                                                         | Sample Storage |
|-----------------|---------------------------------------------------------------------------|----------------------------------------------------------------|---------------|---------------------------------------------------------------------------------------------|----------------|
| TAN, pH         | ECS/BPED: 0, 0.25, 0.5, 1, 2, 3, 6, 9, 12<br>ED: 0, 0.25, 0.5, 1, 2, 3, 4 | All                                                            | 2 mL          | Acidification to pH 2 using 2 M H <sub>2</sub> SO <sub>4</sub> (after measuring pH)         | 20-25°C        |
| Anions          | ECS/BPED: 0, 12<br>ED: 0, 4                                               | All                                                            | 2 mL          | -                                                                                           | 20-25°C        |
| X-DBPs          | ECS/BPED: 0, 3, 9, 12<br>ED: 0, 3, 4                                      | All at initial & final Influent and anode also at intermediate | 3 x 10 mL     | 33 mg/L ascorbic acid; acidify to pH ~3.7 using concentrated H <sub>2</sub> SO <sub>4</sub> | 4°C            |
| HAAs            | ECS/BPED: 0, 3, 9, 12<br>ED: 0, 3, 4                                      | All at initial & final Influent and anode also at intermediate | 3 x 10 mL     | 33 mg/L ascorbic acid; acidify to pH ≤ 0.5 with concentrated H <sub>2</sub> SO <sub>4</sub> | 4°C            |
| Pharmaceuticals | 0, 12                                                                     | All                                                            | 3 x 50 mL     | 33 mg/L ascorbic acid                                                                       | 4°C            |

## 1.4 Pharmaceutical Analysis

### 1.4.1 Sample Preparation

50 mL of samples spiked with 200 µg/L of internal standards (emtricitabine-<sup>13</sup>C, <sup>15</sup>N<sub>2</sub>, atenolol-d<sub>7</sub>, sulfamethoxazole-d<sub>4</sub>, N4 acetyl-sulfamethoxazole-d<sub>4</sub>, trimethoprim-d<sub>3</sub>, metoprolol-d<sub>7</sub>, naproxen-d<sub>3</sub>, bezafibrate-d<sub>4</sub>, propranolol-d<sub>7</sub>, carbamazepine-d<sub>10</sub>, diclofenac-d<sub>4</sub>, iopromide-d<sub>3</sub>) were processed by solid phase extraction (SPE) using Waters Oasis HLB cartridges (3 cc / 60 mg, 30-µm diameter sorbent) (Milford, MA). Cartridges were conditioned with 2 mL methanol, followed by 2 mL water prior to sample loading. After sample loading, the cartridges were dried under vacuum for about one hour. Pharmaceuticals were then eluted by gravity with 2 mL methanol/acetone (1:1 mixture, v/v), and the samples were concentrated further to 0.5 mL under nitrogen gas. Extracts were stored at -20°C until analysis via liquid chromatography-mass spectrometry (LC-MS) for target analysis and liquid chromatography-high resolution mass spectrometry (LC-HRMS) for non-target analysis.

### 1.4.2 Target Analysis

Samples were analyzed on an Agilent 1260 HPLC with an Agilent 6460 Triple Quadrupole MS using an Agilent Poroshell 120 EC-C18 2.7 µm, 3.0 x 50 mm column (Agilent, Santa Clara, CA). Compounds (Table S1-3) were separated with a 16-minute gradient method (Table S1-4) using 5 mM aqueous ammonium formate (mobile phase A) and acetonitrile (mobile phase B) at a flowrate of 0.6 mL/min. 10 µL of sample were injected during each run. Compounds were detected using positive electrospray ionization mode with a gas temperature of 300°C, gas flowrate of 7 L/min, a nebulizer pressure of 45 psi, a sheath gas temperature of 250°C, a sheath gas flowrate of 9 L/min,

a capillary voltage of 3500 V, and a nozzle voltage of 500 V. Compounds were quantified using multiple-reaction monitoring (MRM) with compound-specific MR parameters and retention times shown in Table S1-5.

Table S1-3. Target pharmaceuticals, their properties, and internal standards. Pharmaceuticals that were spiked into urine but are not listed in this table (i.e., emtricitabine, sulfamethoxazole, N4 acetyl-sulfamethoxazole, naproxen, iopromide) were not quantified as target pharmaceuticals due to issues with internal standard detection and/or poor calibration curves. pKa's were found in previous literature<sup>19</sup> unless otherwise indicated. MW= molecular weight; IS= internal standard.

| Abbrev. | Compound      | Structure                                                                           | Function        | MW (g/mol) | pKa                     | IS      |
|---------|---------------|-------------------------------------------------------------------------------------|-----------------|------------|-------------------------|---------|
| ATE     | Atenolol      | 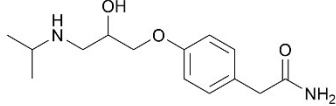   | Beta-blocker    | 266.34     | 9.6                     | ATE-d7  |
| TMP     | Trimethoprim  |    | Antibiotic      | 290.32     | 7.4                     | TMP-d3  |
| MET     | Metoprolol    |    | Beta-blocker    | 267.37     | 9.5                     | MET-d7  |
| BZF     | Bezafibrate   |   | Lipid regulator | 361.8      | 3.83 <sup>115</sup>     | BZF-d4  |
| PRO     | Propranolol   |  | Beta-blocker    | 259.34     | 9.1                     | PRO-d7  |
| CBZ     | Carbamazepine |  | Antiepileptic   | 236.27     | ~1, 13.9 <sup>116</sup> | CBZ-d10 |
| DIC     | Diclofenac    |  | Pain reliever   | 296.1      | 3.99-4.3 <sup>117</sup> | DIC-d4  |

Table SI-4. Mobile phase gradient for LC-MS method for target pharmaceutical analysis where mobile phase A is 5 mM aqueous ammonium formate and mobile phase B is acetonitrile.

| Time (min) | A (%) | B (%) |
|------------|-------|-------|
| 0          | 98    | 2     |
| 2          | 98    | 2     |
| 10         | 0     | 100   |
| 11         | 0     | 100   |
| 13         | 98    | 2     |
| 16         | 98    | 2     |

Table SI-5. Mass spectrometry parameters for target pharmaceutical analysis.

| Compound | Retention Time (min) | Precursor Ion m/z | Product Ion m/z | Quantifying or Qualifying | Fragmentor Voltage (V) | Collision Energy (V) | Dwell (s) |
|----------|----------------------|-------------------|-----------------|---------------------------|------------------------|----------------------|-----------|
| ATE      | 5.18                 | 267               | 145             | Qualifying                | 130                    | 24                   | 100       |
| ATE      | 5.18                 | 267               | 190             | Quantifying               | 130                    | 16                   | 100       |
| ATE-d7   | 5.15                 | 274               | 145             | Quantifying               | 130                    | 24                   | 100       |
| TMP      | 5.85                 | 291               | 123             | Qualifying                | 140                    | 20                   | 7         |
| TMP      | 5.85                 | 291               | 261             | Quantifying               | 140                    | 17                   | 7         |
| TMP-d3   | 5.82                 | 294               | 123             | Qualifying                | 140                    | 20                   | 7         |
| TMP-d3   | 5.82                 | 294               | 264             | Quantifying               | 140                    | 17                   | 7         |
| MET      | 6.25                 | 268               | 159             | Quantifying               | 130                    | 17                   | 7         |
| MET      | 6.25                 | 268               | 116             | Qualifying                | 130                    | 14                   | 7         |
| MET-d7   | 6.25                 | 275               | 159             | Quantifying               | 130                    | 17                   | 7         |
| MET-d7   | 6.25                 | 275               | 123             | Qualifying                | 130                    | 14                   | 7         |
| BZF      | 8.27                 | 362               | 139             | Quantifying               | 138                    | 21                   | 7         |
| BZF      | 8.27                 | 362               | 316             | Qualifying                | 138                    | 5                    | 7         |
| BZF-d4   | 8.25                 | 366               | 143             | Quantifying               | 138                    | 21                   | 7         |
| BZF-d4   | 8.25                 | 366               | 320             | Qualifying                | 138                    | 5                    | 7         |
| PRO      | 6.97                 | 260               | 116             | Quantifying               | 98                     | 13                   | 7         |
| PRO      | 6.96                 | 260               | 183             | Qualifying                | 98                     | 12                   | 7         |
| PRO-d7   | 6.95                 | 267               | 190             | Qualifying                | 98                     | 12                   | 7         |
| PRO-d7   | 6.95                 | 267               | 116             | Quantifying               | 98                     | 13                   | 7         |
| CBZ      | 7.51                 | 237               | 179             | Qualifying                | 120                    | 35                   | 7         |
| CBZ      | 7.51                 | 237               | 194             | Quantifying               | 120                    | 15                   | 7         |
| CBZ-d10  | 7.48                 | 247               | 204             | Quantifying               | 120                    | 20                   | 7         |
| CBZ-d10  | 7.48                 | 247               | 189             | Qualifying                | 120                    | 35                   | 7         |
| DIC      | 9.12                 | 296               | 250             | Qualifying                | 118                    | 5                    | 7         |
| DIC      | 9.11                 | 296               | 214             | Quantifying               | 118                    | 29                   | 7         |
| DIC-d4   | 9.10                 | 300               | 254             | Qualifying                | 118                    | 5                    | 7         |
| DIC-d4   | 9.10                 | 300               | 218             | Quantifying               | 118                    | 29                   | 7         |

### 1.4.3 Suspect Screening

Samples were analyzed on a Thermo Scientific Orbitrap Exploris 240 mass spectrometer (Thermo Scientific, Waltham, MA) using an Agilent Poroshell 120 EC-C18 2.7  $\mu\text{m}$ , 3.0 x 50 mm column (Agilent, Santa Clara, CA) for ECS and a Kinetex Core-Shell C18 2.6  $\mu\text{m}$ , 2.1 x 150 mm column (Phenomenex, Torrance, CA) for ED and BPED. Compounds were separated with a 22-minute gradient method (Table S1-6) using 0.1% aqueous formic acid (mobile phase A) and methanol (mobile phase B) at a flowrate of 0.2 mL/min. 10  $\mu\text{L}$  of sample were injected during each run. Compounds were detected using positive and negative electrospray ionization mode with collision gas pressure of 1 mTorr, spray voltages of 3500 V (positive) and 2500 V (negative), ion transfer tube temperature of 320°C, vaporizer temperature of 275°C, and expected peak width of 6 seconds. For the MasterScan, MS data were collected with an Orbitrap resolution of 120000, an m/z scan range of 100 to 1000 and a radio frequency lens of 70% in positive and negative modes. All-ion fragmentation data were collected using an HCD (high-energy collisional dissociation) collision energy of 30%, Orbitrap resolution of 60000, m/z scan range of 50 to 1000, m/z isolation range of 100 to 1000, and a radio frequency lens of 70% in both positive and negative modes. Data were collected in both positive and negative mode, but only data in positive mode were used for analysis to keep the quantity of data manageable and because all target compounds were detected in positive mode so we could not validate the suspect screening workflow in negative mode.

Table S1-6. Mobile phase gradient for LC-HRMS method for non-target analysis where mobile phase A is 0.1% aqueous formic acid and mobile phase B is methanol.

| Time (min) | A (%) | B (%) |
|------------|-------|-------|
| 0          | 98    | 2     |
| 2          | 98    | 2     |
| 10         | 0     | 100   |
| 14         | 0     | 100   |
| 15         | 98    | 2     |
| 22         | 98    | 2     |

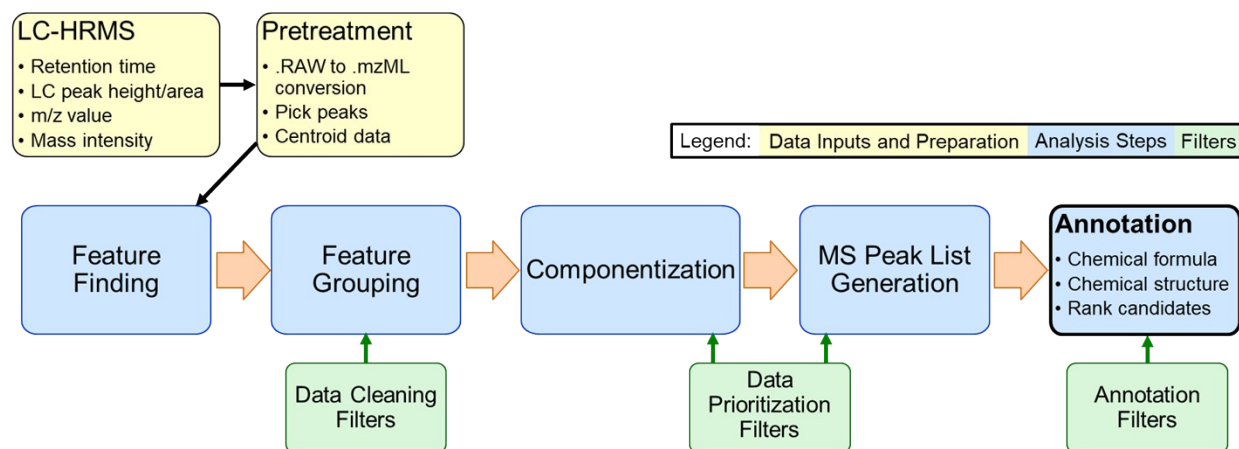

Figure S1-2. Illustration of suspect screening analysis workflow.

Table SI-7. Parameters for data pretreatment using Proteowizard MSconvert.

| Parameter                                   | Value                              |
|---------------------------------------------|------------------------------------|
| Output format                               | mzML                               |
| Binary coding precision                     | 64-bit                             |
| Polarity                                    | positive                           |
| Peak picking: algorithm                     | CWT (continuous wavelet transform) |
| Peak picking: MS levels                     | 1                                  |
| Peak picking: minimum signal-to-noise ratio | 0.1                                |
| Peak picking: minimum peak spacing          | 0.1                                |

Table SI-8. Parameters for feature finding in patRoan. These parameter values were determined by using patRoan's built-in feature finding optimization function with positive-mode data collected for spiked DI standards (0.5 µg/L) that were analyzed with samples for ECS and BPED. Feature finding parameters were separately optimized using the entire dataset for standards and samples analyzed for ED experiments to improve detection of target compounds during suspect screening.

| Parameter                                                                                                                                                 | Value for ECS & BPED | Value for ED |
|-----------------------------------------------------------------------------------------------------------------------------------------------------------|----------------------|--------------|
| Algorithm                                                                                                                                                 | openms               | openms       |
| Noise intensity threshold (noiseThrInt)                                                                                                                   | 5400                 | 13000        |
| Minimum signal-to-noise ratio of mass trace (chromSNR)                                                                                                    | 10.9                 | 5.32         |
| Retention time range in which to look for coeluting/isotopic mass traces (localRTRange)                                                                   | 23                   | 30.5         |
| m/z range in which to look for coeluting/isotopic mass traces (localMZRange)                                                                              | 19.8                 | 12.6         |
| Retention time window that is used to find the closest data point to the retention time to obtain the intensity of a feature (intSearchRTWindow, seconds) | 9.2                  | 1            |
| Expected chromatographic peak width (chromFWHM, seconds)                                                                                                  | 5                    | 1            |
| Allowed mass deviation from trace detection (mzPPM, ppm)                                                                                                  | 10                   | 24           |
| Minimum chromatographic peak width (minFWHM, seconds)                                                                                                     | 1                    | 1            |
| Maximum chromatographic peak width (maxFWHM, seconds)                                                                                                     | 20                   | 15.248       |

Table SI-9. Parameters for feature grouping and feature group filtering in patRoön. Parameter values for feature grouping were determined by using patRoön's built-in feature grouping optimization function with positive-mode data collected for spiked DI standards (0.5 µg/L) that were analyzed with ECS and BPED samples. Feature grouping parameters were separately optimized using the entire dataset for standards and samples analyzed for ED experiments to improve detection of target compounds during suspect screening. Parameters for feature group filtering were set so that no target compounds were eliminated during filtering, which was checked using patRoön's suspect screening function.

| Parameter                                                                                                                              | Value for ECS & BPED | Value for ED |
|----------------------------------------------------------------------------------------------------------------------------------------|----------------------|--------------|
| <b>Feature Grouping</b>                                                                                                                |                      |              |
| Algorithm                                                                                                                              | openms               | openms       |
| Enable retention time alignment (rtalign)                                                                                              | TRUE                 | TRUE         |
| Maximum retention time difference for feature pairing during retention alignment (maxAlignRT, seconds)                                 | 15                   | 15           |
| Maximum m/z difference for feature pairing during retention alignment (maxAlignMZ, Da)                                                 | 0.002                | 0.002        |
| Maximum retention time difference for feature pairing during feature grouping (maxGroupRT, seconds)                                    | 12                   | 6            |
| Maximum m/z difference for feature pairing during feature grouping (maxGroupMZ, Da)                                                    | 0.0065               | 0.002        |
| <b>Feature Group Filtering<sup>118</sup></b>                                                                                           |                      |              |
| Retention time shift of samples based on time-position of peak apex (ElutionShiftScore)                                                | 0.8 – 1              | 0.8 – 1      |
| Retention time alignment of samples by comparing the time at the center index of the time vector (RetentionTimeCorrelationScore)       | 0.9 – 1              | 0.9 – 1      |
| Shape quality based on normalized variance between a point and its immediate neighbor on either side (ZigZagScore)                     | 0.9 – 1              | 0.9 – 1      |
| Measurement of first unexpected change in direction of intensity to detect splitting and integration of multiple peaks (ModalityScore) | > 0.3                | > 0.3        |
| Measurement of correlation between left and right halves of peaks (SymmetryScore)                                                      | > 0.4                | > 0.4        |
| Shape quality based on comparing peak area to area of triangle formed by apex and boundaries (TPASRScore)                              | > 0.25               | > 0.25       |
| Completeness of integration based on boundary-over-apex intensity ratio (ApexBoundaryRatioScore)                                       | > 0.55               | > 0.55       |
| Separation of peaks by measuring peak-width at half-max vs. peak-width at base (FWHM2BaseScore)                                        | > 0.15               | > 0.15       |
| Shape quality based on number of changes in direction over length of intensity vector (JaggednessScore)                                | > 0.3                | > 0.3        |
| Similarity of peak to Gaussian-fitted curve (GaussianSimilarityScore)                                                                  | > 0.6                | > 0.6        |

Table SI-10. Parameters for componentization and generating MS peak lists in patRoan.

| <b>Parameter</b>                                                                                            | <b>Value</b>                                                                                    |
|-------------------------------------------------------------------------------------------------------------|-------------------------------------------------------------------------------------------------|
| <b><i>Componentization</i></b>                                                                              |                                                                                                 |
| Algorithm                                                                                                   | openms                                                                                          |
| Ionization                                                                                                  | positive                                                                                        |
| Potential adducts (probability)                                                                             | [M+H] <sup>+</sup> (0.34), [M+Na] <sup>+</sup> (0.33), [M+NH <sub>4</sub> ] <sup>+</sup> (0.33) |
| Preferential adduct                                                                                         | [M+H] <sup>+</sup>                                                                              |
| <b><i>Generating MS Peak Lists</i></b>                                                                      |                                                                                                 |
| Algorithm                                                                                                   | mzr                                                                                             |
| Maximum m/z window used to cluster mass peaks when averaging (clusterMzWindow)                              | 0.005                                                                                           |
| Maximum time window around feature RT to collect spectra for averaging (maxMSRtWindow, seconds)             | 5                                                                                               |
| Maximum precursor m/z search window to find MS/MS spectra (precursorMzWindow)                               | NULL                                                                                            |
| Number of most intense mass peaks to retain (topMost)                                                       | NULL                                                                                            |
| Intensity below which mass peaks will be removed before/after averaging (minIntensityPre, minIntensityPost) | 500                                                                                             |
| Function used to calculate avg m/z values (avgFun)                                                          | mean                                                                                            |
| Method for producing averaged MS spectra (method)                                                           | hclust (hierarchical clustering)                                                                |
| Remove peak lists without precursor peaks (pruneMissingPrecursorMS)                                         | TRUE                                                                                            |
| Retain MS/MS precursor mass peak even if not among topMost peaks for MS/MS (retainPrecursorMSMS)            | TRUE                                                                                            |
| Absolute minimum MS mass peak intensity (absMSIntThr)                                                       | 500                                                                                             |
| Relative minimum MS/MS mass peak intensity (relMSMSIntThr)                                                  | 0.02                                                                                            |
| Number of most intense MS/MS peaks to retain (topMSMSPeaks)                                                 | 10                                                                                              |

Table SI-11. Parameters for annotation with formulas and compounds in patRoom.

| Parameter                                                                                                                        | Value       |
|----------------------------------------------------------------------------------------------------------------------------------|-------------|
| <b>Formula Annotation</b>                                                                                                        |             |
| Algorithm                                                                                                                        | genform     |
| Maximum relative m/z deviation for formula to be considered (relMzDev, ppm)                                                      | 5           |
| Maximum m/z window used to re-align peaks (absAlignMzDev)                                                                        | 0.005       |
| Elements to consider (elements)                                                                                                  | CHNOSCI     |
| Minimum relative amount that candidate formula for feature group should be found among all annotated features (featThresholdAnn) | 0.75        |
| Only consider organic formulas (oc)                                                                                              | TRUE        |
| Data (MS, MSMS, or both) used for formula generation (MSMode)                                                                    | Both        |
| Formulas calculated for individual features and pooled for feature groups (calculateFeatures)                                    | FALSE       |
| <b>Compound Annotation</b>                                                                                                       |             |
| Algorithm                                                                                                                        | metfrag     |
| Method                                                                                                                           | CL          |
| Database                                                                                                                         | pubchemlite |
| Relative mass deviation for database search (dbRelMzDev, ppm)                                                                    | 5           |
| Relative mass deviation for fragment matching (fragRelMzDev, ppm)                                                                | 5           |
| Absolute mass deviation for fragment matching (fragAbsMzDev, Da)                                                                 | 0.002       |
| Number of candidates after which search stops and no results will be returned for feature group (maxCandidatesToStop)            | 2500        |
| Scoring types and weights                                                                                                        | default     |
| <b>Compound Filtering</b>                                                                                                        |             |
| Minimum number of annotated MS/MS peaks for candidate (minExplainedPeaks)                                                        | 1           |

#### 1.4.4 Metrics for Pharmaceutical Fate

Table SI-12. Existing water reuse guidelines for pharmaceuticals.

| Abbrev.                                                                                       | Compound      | California Recycled Water Policy Reporting Limit <sup>19</sup> |                                            | Australian Recycled Drinking Water Guideline (µg/L) <sup>20</sup> |
|-----------------------------------------------------------------------------------------------|---------------|----------------------------------------------------------------|--------------------------------------------|-------------------------------------------------------------------|
|                                                                                               |               | Surface Application (µg/L) <sup>a</sup>                        | Subsurface Application (µg/L) <sup>b</sup> |                                                                   |
| -                                                                                             | Gemfibrozil   | 0.01                                                           | -                                          | 600                                                               |
| -                                                                                             | Iohexol       | 0.05                                                           | -                                          | 720                                                               |
| ATE                                                                                           | Atenolol      | -                                                              | -                                          | -                                                                 |
| TMP                                                                                           | Trimethoprim  | -                                                              | -                                          | 70                                                                |
| MET                                                                                           | Metoprolol    | -                                                              | -                                          | 25                                                                |
| BZF                                                                                           | Bezafibrate   | -                                                              | -                                          | 300                                                               |
| PRO                                                                                           | Propranolol   | -                                                              | -                                          | 40                                                                |
| CBZ                                                                                           | Carbamazepine | -                                                              | -                                          | 100                                                               |
| DIC                                                                                           | Diclofenac    | -                                                              | -                                          | 1.8                                                               |
| <sup>a</sup> Groundwater recharge via surface application                                     |               |                                                                |                                            |                                                                   |
| <sup>b</sup> Reservoir water augmentation and groundwater recharge via subsurface application |               |                                                                |                                            |                                                                   |

Table SI-13. Samples for calculation of pharmaceutical fold changes.

| Subscript       | ECS                | ED                             | BPED                           |
|-----------------|--------------------|--------------------------------|--------------------------------|
| <b>influent</b> | Chamber 1, initial | Chamber 2 (Diluate), initial   | Chamber 2 (Diluate), initial   |
| <b>product</b>  | Chamber 3, final   | Chamber 3 (Concentrate), final | Chamber 3 (Concentrate), final |
| <b>effluent</b> | Chamber 1, final   | Chamber 2 (Diluate), final     | Chamber 2 (Diluate), final     |

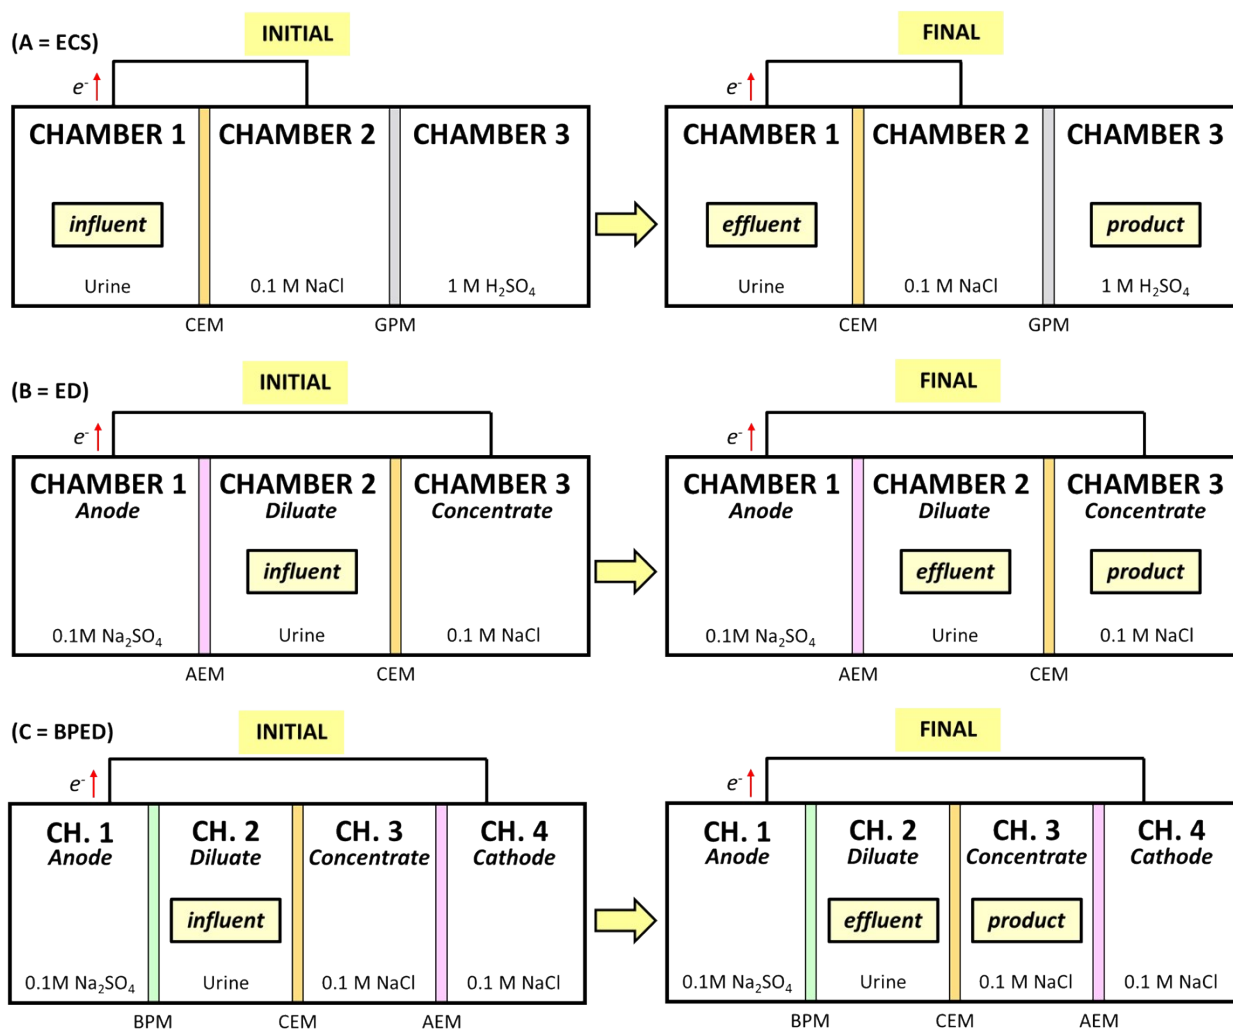

Figure SI-3. Samples for calculating fold changes of pharmaceuticals and features detected during suspect screening for ECS (A), ED (B), and BPED (C). Sample names are indicated in bold italic font in yellow boxes. Names of chamber solutions for ED and BPED are indicated in bold italic font. Solution composition and reactor components are indicated in regular font at the bottom of diagrams (CEM = cation exchange membrane, GPM = gas permeable membrane, AEM = anion exchange membrane, BPM = bipolar membrane).

## 1.5 Disinfection Byproduct Analysis

THMs included chloroform ( $\text{CHCl}_3$ , TCM), bromodichloromethane (BDCM), dibromochloromethane (DBCM), and bromoform ( $\text{CHBr}_3$ , TBM), which are regulated in drinking water as total THMs.<sup>121</sup> HAAs included dichloroacetic acid (DCAA), chloroacetic acid (CAA), trichloroacetic acid (TCAA), bromoacetic acid (BAA), and dibromoacetic acid (DBAA), which are regulated in drinking water as HAA5,<sup>121</sup> as well as bromochloroacetic acid (BCAA). Additional HAAs, including chlorodibromoacetic acid (CDBAA), bromodichloroacetic acid (BDCAA), and tribromoacetic acid (TBAA), were measured but not detected; concentrations were not reported due to poor calibration curves. HANs included bromochloroacetonitrile (BCAN), dibromoacetonitrile (DBAN), dichloroacetonitrile (DCAN), and trichloroacetonitrile (TCAN). HALs included trichloroacetaldehyde (chloral hydrate; TCAL). HKs included 1,1-dichloropropanone (1,1-DCP) and 1,1,1-trichloropropanone (1,1,1-TCP). Only one HNM, trichloronitromethane or chloropicrin (TCNM), was included as in previous DBP studies.<sup>96,122,123</sup> HAMs included dichloroacetamide (DCAM) and trichloroacetamide (TCAM).

THMs, HANs, HALs, HKs, HNMs, and HAMs were extracted by modified USEPA Method 551.1, while HAAs were extracted by modified USEPA Method 552.3.<sup>96,122–127</sup> For THMs, HANs, HALs, HKs, HNMs, and HAMs, 10 mL aliquots supplemented with 3 g of sodium sulfate were extracted into 2 mL of methyl tert-butyl ether (MTBE) containing 300  $\mu\text{g/L}$  1,2-dibromopropane as an internal standard. Extracts were concentrated to  $\sim 0.5$  mL under nitrogen. For HAAs, 10 mL aliquots acidified to  $\text{pH} < 0.5$  with sulfuric acid and supplemented with 3 g of sodium sulfate were extracted into 2 mL of MTBE containing 300  $\mu\text{g/L}$  1,2-dibromopropane as an internal standard. Recovered MTBE extracts were mixed with 0.8 mL of acidic methanol (with 10% concentrated  $\text{H}_2\text{SO}_4$ , v/v) and incubated at  $50^\circ\text{C}$  in a water bath for 2 hours. The mixture was extracted with 2.5 mL of 150 g/L  $\text{Na}_2\text{SO}_4$  solution, neutralized by 1 mL of saturated  $\text{NaHCO}_3$  solution, and further concentrated to a final volume of  $\sim 0.5$  mL under a gentle nitrogen stream. All DBPs were analyzed by GC-MS using an Agilent 7890A GC with a DB-1701 fused silica capillary column coupled with an Agilent 240 Ion Trap mass spectrometer (Agilent, Santa Clara, CA) using electron ionization mode for THMs, HANs, HALs, HKs, HNM, and HAAs and chemical ionization mode with methanol as the reagent gas for HAMs. These DBPs were quantified using standard curves in water and urine (0.5 – 100  $\mu\text{g/L}$ ).

Table SI-14. Summary of disinfection byproducts quantified in this study with limits of detection (LODs). Calibration curves were fit for the normalized peak area (analyte peak area divided by internal standard peak area for sample with analyte peak area divided by internal standard peak area for blank subtracted) vs. the expected concentration of the standard. LODs were determined as 3.3 times the standard error in the estimated normalized peak area divided by the slope of the calibration curve. Limits of quantification (LOQs, not shown here) were determined as 10 times the standard error in the estimated normalized peak area divided by the slope of the calibration curve. LODs were determined for each set of samples and the averages and standard deviations across all sets are summarized in this table. Asterisks indicate species that were not detected (i.e., no GC-MS peaks) in any samples and not quantified due to poor calibration curves in urine likely due to matrix effects; for these species, GC-MS peaks were only detected at the top two to three concentrations of the standard range, which we considered insufficient for creating reliable calibration curves.

| Species                                  | Abbreviation                          | Detection Limit in Water ( $\mu\text{g/L}$ ) | Detection Limit in Urine ( $\mu\text{g/L}$ ) |
|------------------------------------------|---------------------------------------|----------------------------------------------|----------------------------------------------|
| <b>Trihalomethanes (THMs)</b>            |                                       |                                              |                                              |
| Chloroform ( $\text{CHCl}_3$ )           | TCM                                   | $5.5 \pm 6.7$                                | $4.3 \pm 4.6$                                |
| Bromodichloromethane                     | BDCM                                  | $1.6 \pm 1.2$                                | $0.6 \pm 0.6$                                |
| Dibromochloromethane                     | DBCM                                  | $0.7 \pm 0.6$                                | $0.5 \pm 0.4$                                |
| Bromoform ( $\text{CHBr}_3$ )            | TBM                                   | $1.0 \pm 0.9$                                | $0.3 \pm 0.2$                                |
| Total trihalomethanes                    | THM4 = TCM + BDCM + DBCM + TBM        |                                              |                                              |
| <b>Haloacetic acids (HAAs)</b>           |                                       |                                              |                                              |
| Chloroacetic acid                        | CAA                                   | $4.3 \pm 2.9$                                | $2.4 \pm 0.7$                                |
| Dichloroacetic acid                      | DCAA                                  | $2.2 \pm 1.2$                                | $9.5 \pm 2.3$                                |
| Trichloroacetic acid                     | TCAA                                  | $2.1 \pm 1.1$                                | $5.5 \pm 2.2$                                |
| Bromoacetic acid                         | BAA                                   | $1.7 \pm 0.6$                                | $1.8 \pm 1.5$                                |
| Dibromoacetic acid                       | DBAA                                  | $1.5 \pm 0.2$                                | $10.9 \pm 27$                                |
| Total haloacetic acids                   | HAA5 = CAA + DCAA + TCAA + BAA + DBAA |                                              |                                              |
| Bromochloroacetic acid                   | BCAA                                  | $1.1 \pm 0.27$                               | $18.2 \pm 13.7$                              |
| Chlorodibromoacetic acid                 | CDBAA*                                | -                                            | -                                            |
| Bromodichloroacetic acid                 | BDCAA*                                | -                                            | -                                            |
| Tribromoacetic acid                      | TBAA*                                 | -                                            | -                                            |
| <b>Haloacetonitriles (HANs)</b>          |                                       |                                              |                                              |
| Bromochloroacetonitrile                  | BCAN                                  | $1.1 \pm 0.89$                               | $5.3 \pm 5.7$                                |
| Dibromoacetonitrile                      | DBAN                                  | $1.9 \pm 1.7$                                | $5.2 \pm 3.0$                                |
| Dichloroacetonitrile                     | DCAN                                  | $0.7 \pm 0.5$                                | $4.2 \pm 4.6$                                |
| Trichloroacetonitrile                    | TCAN                                  | $0.6 \pm 0.3$                                | $38 \pm 40$                                  |
| <b>Haloacetaldehydes (HALs)</b>          |                                       |                                              |                                              |
| Trichloroacetaldehyde or chloral hydrate | TCAL                                  | $3.3 \pm 3.0$                                | $21.0 \pm 14$                                |
| <b>Haloketones (HKs)</b>                 |                                       |                                              |                                              |
| 1,1-dichloropropanone                    | 1,1-DCP                               | $0.84 \pm 0.84$                              | $1.5 \pm 0.90$                               |
| 1,1,1-trichloropropanone                 | 1,1,1-TCP                             | $3.8 \pm 4.0$                                | $21.6 \pm 26$                                |
| <b>Halonitromethanes (HNMs)</b>          |                                       |                                              |                                              |
| Trichloronitromethane or chloropicrin    | TCNM                                  | $1.1 \pm 0.90$                               | $24.9 \pm 28$                                |
| <b>Haloacetamides (HAMs)</b>             |                                       |                                              |                                              |
| Dichloroacetamide                        | DCAM                                  | $0.83 \pm 0.41$                              | $1.0 \pm 0.30$                               |
| Trichloroacetamide                       | TCAM                                  | $1.6 \pm 3.5$                                | $0.88 \pm 0.88$                              |

## 2 Results & Discussion

### 2.1 Nitrogen Removal and Recovery Performance

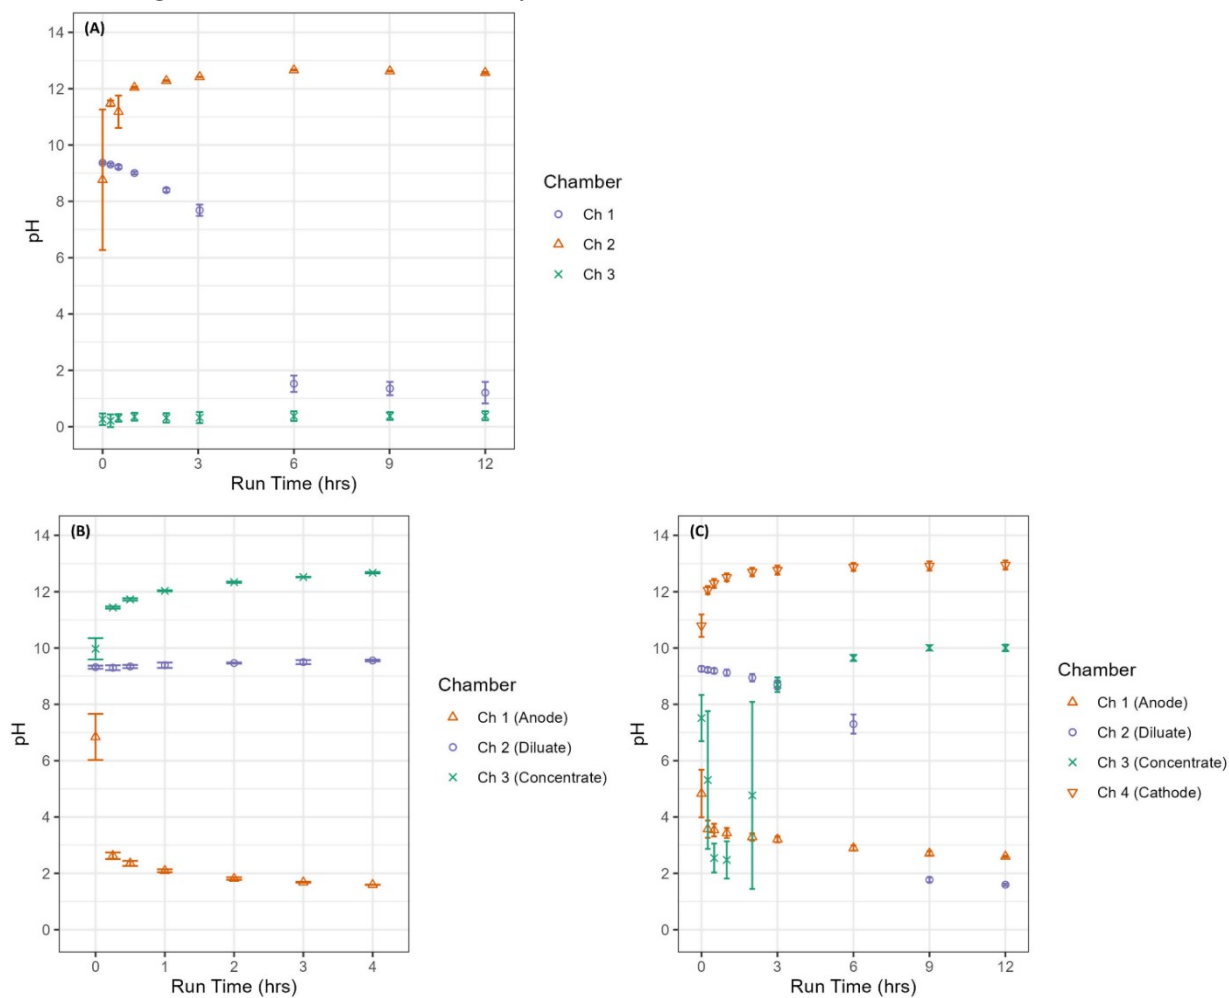

Figure S2-1. pH values observed for ECS (A), ED (B), and BPED (C).

Table S2-1. Average composition of final treated urine across all experiments for each process with influent urine composition included for comparison (also in Table S1-1). For pharmaceuticals, values in parenthesis indicate the number of samples that were non-detect for the compound. For ECS, atenolol was only quantified in 2 of 6 samples because the internal standard was not detected in the other samples.

|                               | Influent Urine | ECS Effluent            | ED Effluent | BPED Effluent |
|-------------------------------|----------------|-------------------------|-------------|---------------|
| TAN (mg/L)                    | 3,280 ± 360    | 70.4 ± 10               | 1,110 ± 38  | 272 ± 21      |
| <b>Cations (mg/L)</b>         |                |                         |             |               |
| Na <sup>+</sup>               | 1,090 ± 42     | 293 ± 22                | 481 ± 19    | 298 ± 9.3     |
| K <sup>+</sup>                | 1,150 ± 190    | 73.5 ± 8.5              | 219 ± 9.2   | 75.1 ± 0.85   |
| Mg <sup>2+</sup>              | 0.418 ± 1.2    | -                       | -           | -             |
| Ca <sup>2+</sup>              | -              | -                       | -           | -             |
| <b>Anions (mg/L)</b>          |                |                         |             |               |
| SO <sub>4</sub> <sup>2-</sup> | 548 ± 63       | 603 ± 25                | 226 ± 21    | 545 ± 9.8     |
| Cl <sup>-</sup>               | 1,860 ± 70     | 1990 ± 37               | 180 ± 3.9   | 2030 ± 41     |
| PO <sub>4</sub> <sup>3-</sup> | 462 ± 14       | 500 ± 3.0               | 295 ± 14    | 452 ± 5.0     |
| <b>Other</b>                  |                |                         |             |               |
| pH                            | 9.32 ± 0.08    | 1.21 ± 0.38             | 9.56 ± 0.03 | 1.60 ± 0.04   |
| COD (mg/L)                    | 3,180 ± 69     | 2,790 ± 52              | 2,130 ± 19  | 2,230 ± 830   |
| <b>Pharmaceuticals (µg/L)</b> |                |                         |             |               |
| Atenolol                      | 15.0 ± 7.9     | 10.9 ± 0.80             | 17.9 ± 0.52 | 0.26 (all ND) |
| Trimethoprim                  | 20.1 ± 3.5     | 0.57 ± 0.64 (5 of 6 ND) | 21.5 ± 1.9  | 11.7 ± 1.4    |
| Metoprolol                    | 26.1 ± 5.1     | 13.5 ± 1.8              | 16.8 ± 1.4  | 7.28 ± 0.51   |
| Bezafibrate                   | 13.4 ± 1.2     | 8.89 ± 1.5              | 10.9 ± 0.50 | 5.06 ± 5.4    |
| Propranolol                   | 30.7 ± 3.6     | 1.03 ± 0.62 (2 of 6 ND) | 16.7 ± 4.4  | 4.13 ± 0.38   |
| Carbamazepine                 | 18.6 ± 3.2     | 7.21 ± 5.6 (2 of 6 ND)  | 18.3 ± 0.17 | 15.5 ± 0.56   |
| Diclofenac                    | 28.9 ± 19.6    | 0.54 (all ND)           | 22.1 ± 5.2  | 0.79 (all ND) |

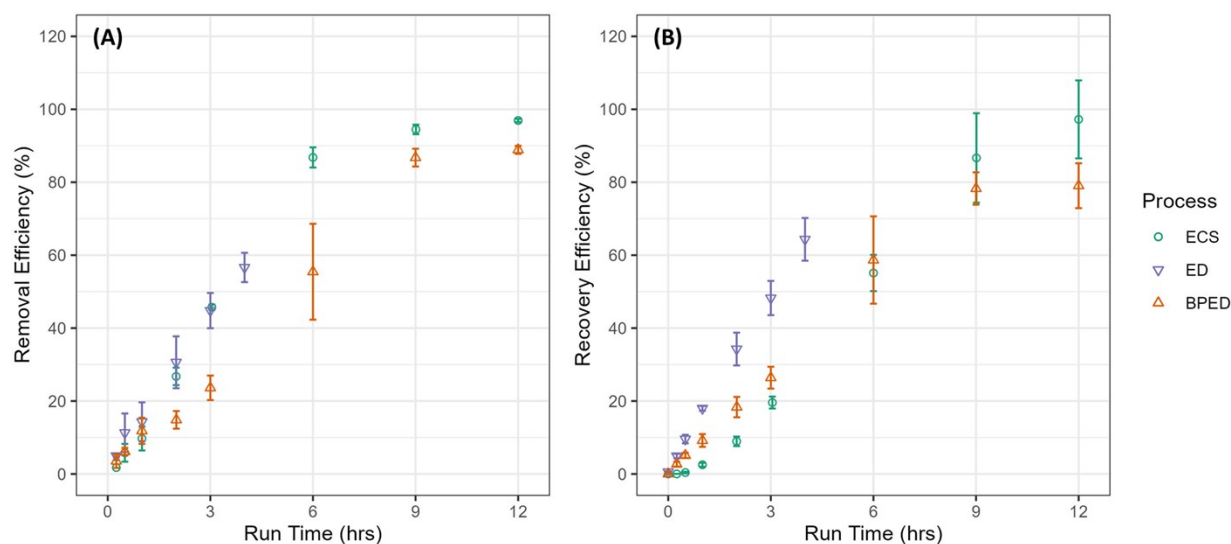

Figure S2-2. TAN removal (A) and recovery efficiencies (B) over time for ECS, ED, and BPED.

Table S2-2. *p*-values for comparison between final TAN fold changes and removal/recovery efficiencies across processes using two-sided *t*-tests. Statistically significant differences (*p*-values < 0.05) are highlighted in yellow.

| Fold Change Type / Efficiency | ECS vs. ED | ECS vs. BPED | ED vs. BPED |
|-------------------------------|------------|--------------|-------------|
| Removal                       | 0.0030     | 0.0023       | 0.0031      |
| Enrichment / Recovery         | 0.0172     | 0.0785       | 0.0401      |

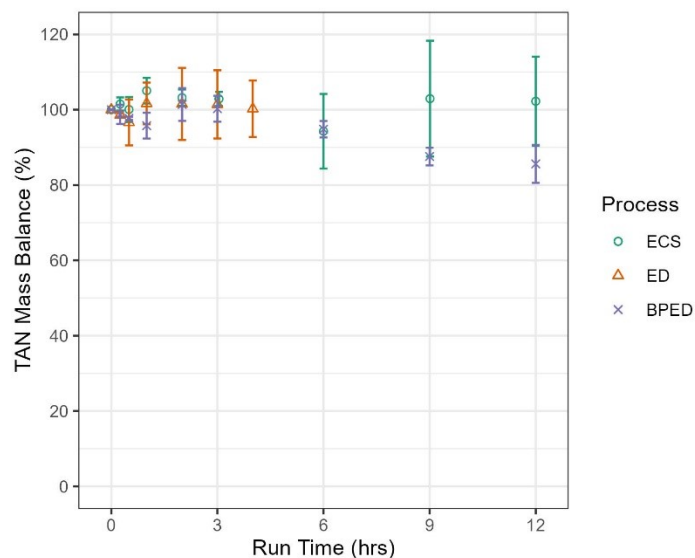

Figure S2-3. Total ammonia nitrogen (TAN) mass balances for ECS, ED, and BPED.

## 2.2 Fate of Organic Contaminants

Table S2-3. Summary of suspect screening workflow and validation with target analysis.

|                |                                  | <b>ECS</b>                       | <b>ED</b>                        | <b>BPED</b>                      |
|----------------|----------------------------------|----------------------------------|----------------------------------|----------------------------------|
| Features       | Total found                      | 474318                           | 425845                           | 544468                           |
| Feature groups | Raw                              | 171296                           | 193429                           | 185542                           |
|                | After filtering                  | 12562                            | 17735                            | 16235                            |
| Formula        | Total candidates                 | 262019                           | 398402                           | 357275                           |
|                | Correctly ranked 1 <sup>st</sup> | 5/7                              | 4/7 (ATE not identified)         | 5/7                              |
|                | Correctly ranked 2 <sup>nd</sup> | 1/7                              | 2/7 (ATE not identified)         | 1/7                              |
|                | Correctly ranked 3 <sup>rd</sup> | 1/7                              | -                                | 1/7                              |
| Compounds      | Total candidates                 | 129001 (raw) / 108537 (filtered) | 162146 (raw) / 144623 (filtered) | 157636 (raw) / 138590 (filtered) |
|                | Correctly ranked 1 <sup>st</sup> | 7/7                              | 6/7 (ATE not identified)         | 7/7                              |

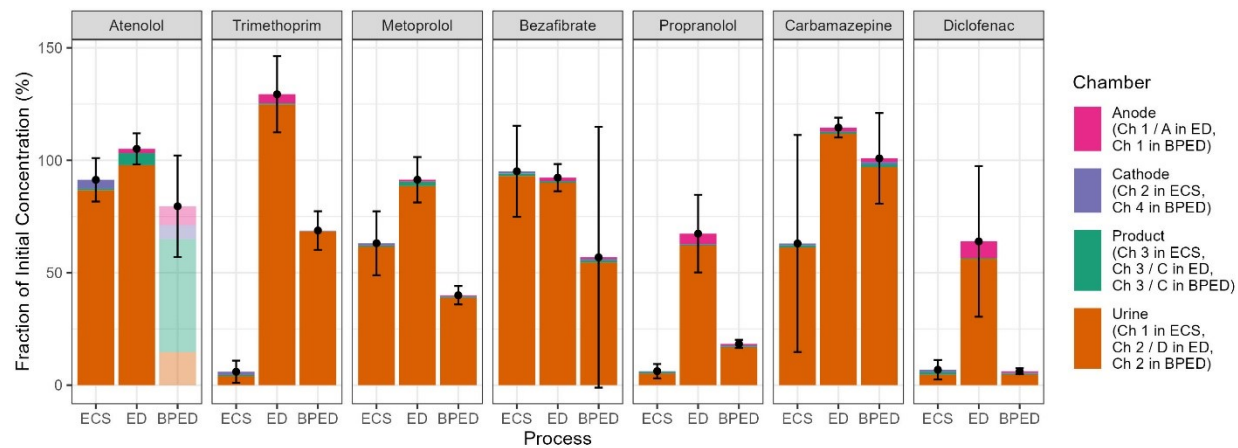

Figure S2-4. Mass balance on target pharmaceuticals for ECS, ED, and BPED. For compounds totaling to less than 100% of the initial concentration, the balance is assumed to be transformed or lost from solution (e.g., sorbed by membrane, volatilized). The mass balance for atenolol during BPED treatment is shown with lighter colors because the internal standard atenolol-d7 was not detected in multiple samples from each replicate experiment, making quantification of atenolol concentration uncertain.

Table S2-4. Target pharmaceuticals, their fates (enrichment and removal ratios, ER and RR), and their properties. pKa's were found in previous literature<sup>19</sup> unless otherwise indicated. MW = molecular weight.

| Compound            | ER             |                |                 | RR           |             |               | Structure                                                                             | MW (g/mol) | pK <sub>a</sub>                | K <sub>H</sub> (atm-m <sup>3</sup> /mol) | log K <sub>ow</sub> |
|---------------------|----------------|----------------|-----------------|--------------|-------------|---------------|---------------------------------------------------------------------------------------|------------|--------------------------------|------------------------------------------|---------------------|
|                     | ECS            | ED             | BPED            | ECS          | ED          | BPED          |                                                                                       |            |                                |                                          |                     |
| Atenolol (ATE)      | 0.007 ± 0.0005 | 0.086 ± 0.011  | 0.72 ± 0.21     | 1.0 ± 0.076  | 1.6 ± 0.15  | 0.21 ± 0.008  | 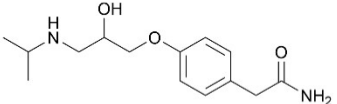   | 266.34     | 9.6                            | 1.378x10 <sup>-18</sup><br>(128)         | 0.16                |
| Trimethoprim (TMP)  | 0.006 ± 0.001  | 0.009 ± 0.0005 | 0.002 ± 0.00006 | 0.040 ± 0.03 | 2.0 ± 0.23  | 0.87 ± 0.11   |    | 290.32     | 7.4                            | 2.4x10 <sup>-14</sup>                    | 0.91                |
| Metoprolol (MET)    | 0.006 ± 0.0007 | 0.032 ± 0.03   | 0.005 ± 0.004   | 0.66 ± 0.07  | 1.4 ± 0.14  | 0.49 ± 0.04   |    | 267.37     | 9.5                            | 2.1x10 <sup>-11</sup>                    | 1.88                |
| Bezafibrate (BZF)   | 0.012 ± 0.002  | 0.012 ± 0.001  | 0.011 ± 0.001   | 1.0 ± 0.05   | 1.5 ± 0.13  | 0.69 ± 0.74   |    | 361.8      | 3.83 <sup>11</sup><br>5        | 2.24x10 <sup>-11</sup><br>(129)          | 3.62 <sup>129</sup> |
| Propranolol (PRO)   | 0.006 ± 0.0009 | 0.008 ± 0.001  | 0.006 ± 0.0002  | 0.059 ± 0.04 | 1.0 ± 0.38  | 0.22 ± 0.02   |   | 259.34     | 9.1                            | 7.98x10 <sup>-13</sup><br>(130)          | 3.48 <sup>130</sup> |
| Carbamazepine (CBZ) | 0.010 ± 0.002  | 0.014 ± 0.001  | 0.015 ± 0.0006  | 0.61 ± 0.5   | 1.8 ± 0.13  | 1.3 ± 0.07    |  | 236.27     | ~1,<br>13.9 <sup>11</sup><br>6 | 1.1x10 <sup>-10</sup>                    | 2.45                |
| Diclofenac (DIC)    | 0.012 ± 0.002  | 0.006 ± 0.002  | 0.006 ± 0.0002  | 0.052 ± 0.01 | 0.91 ± 0.09 | 0.060 ± 0.002 |  | 296.1      | 3.99-<br>4.3 <sup>117</sup>    | 4.73x10 <sup>-12</sup><br>(131)          | 4.51                |

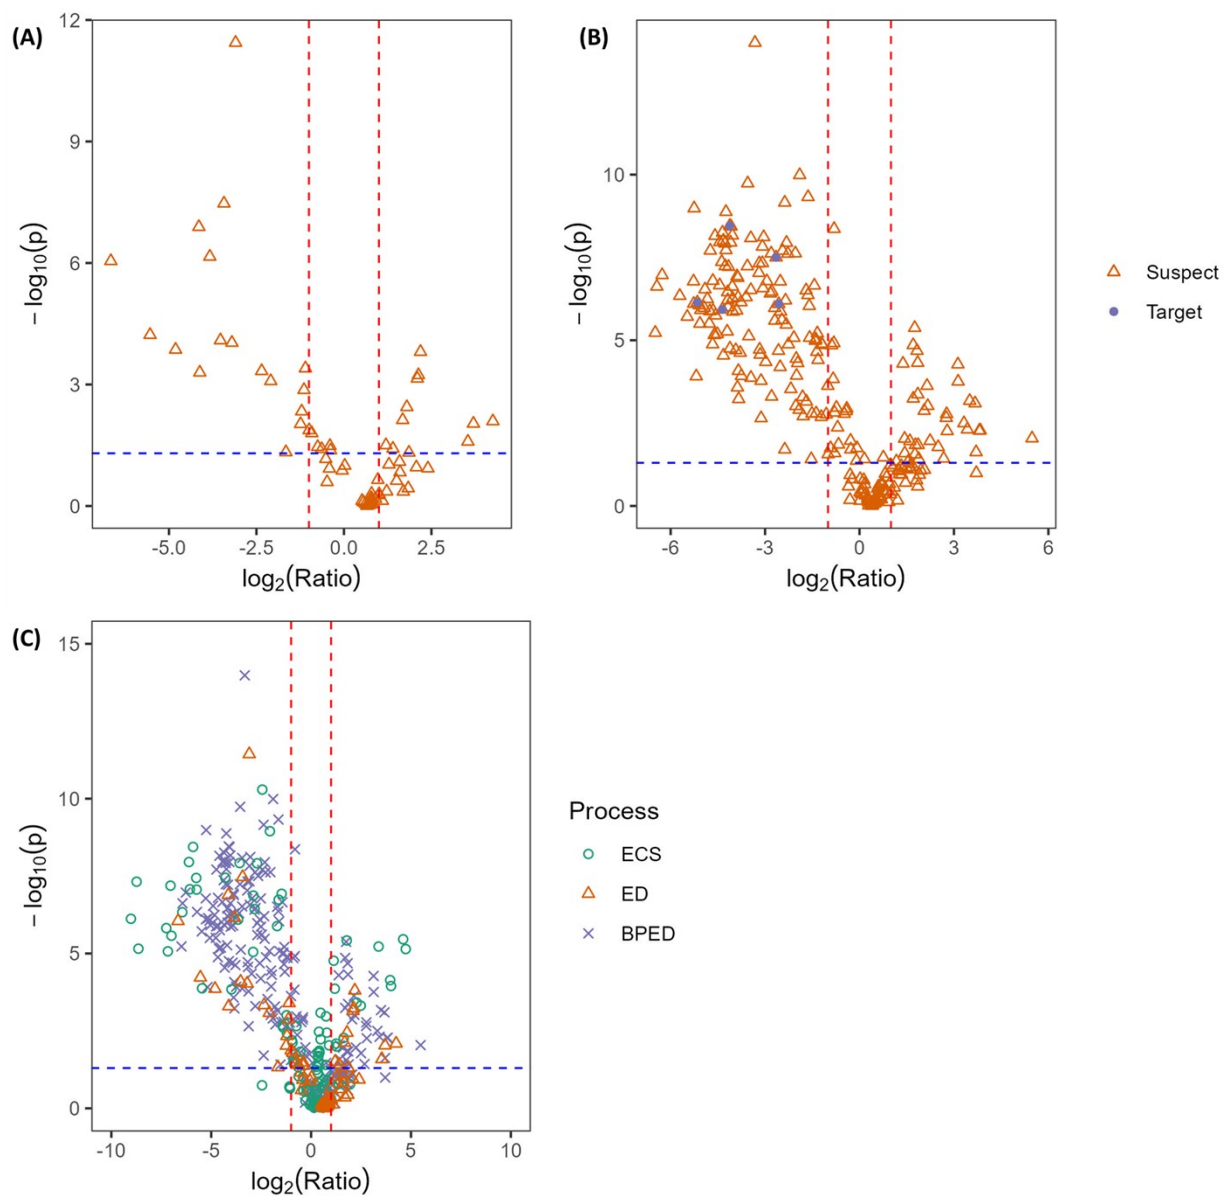

Figure S2-5. Volcano plots for enrichment ratio for ED (A) and BPED (B) as calculated for each of the target pharmaceuticals and all features detected during suspect screening. Volcano plots for enrichment ratio overlaid for all processes (C) based on all features detected during suspect screening.

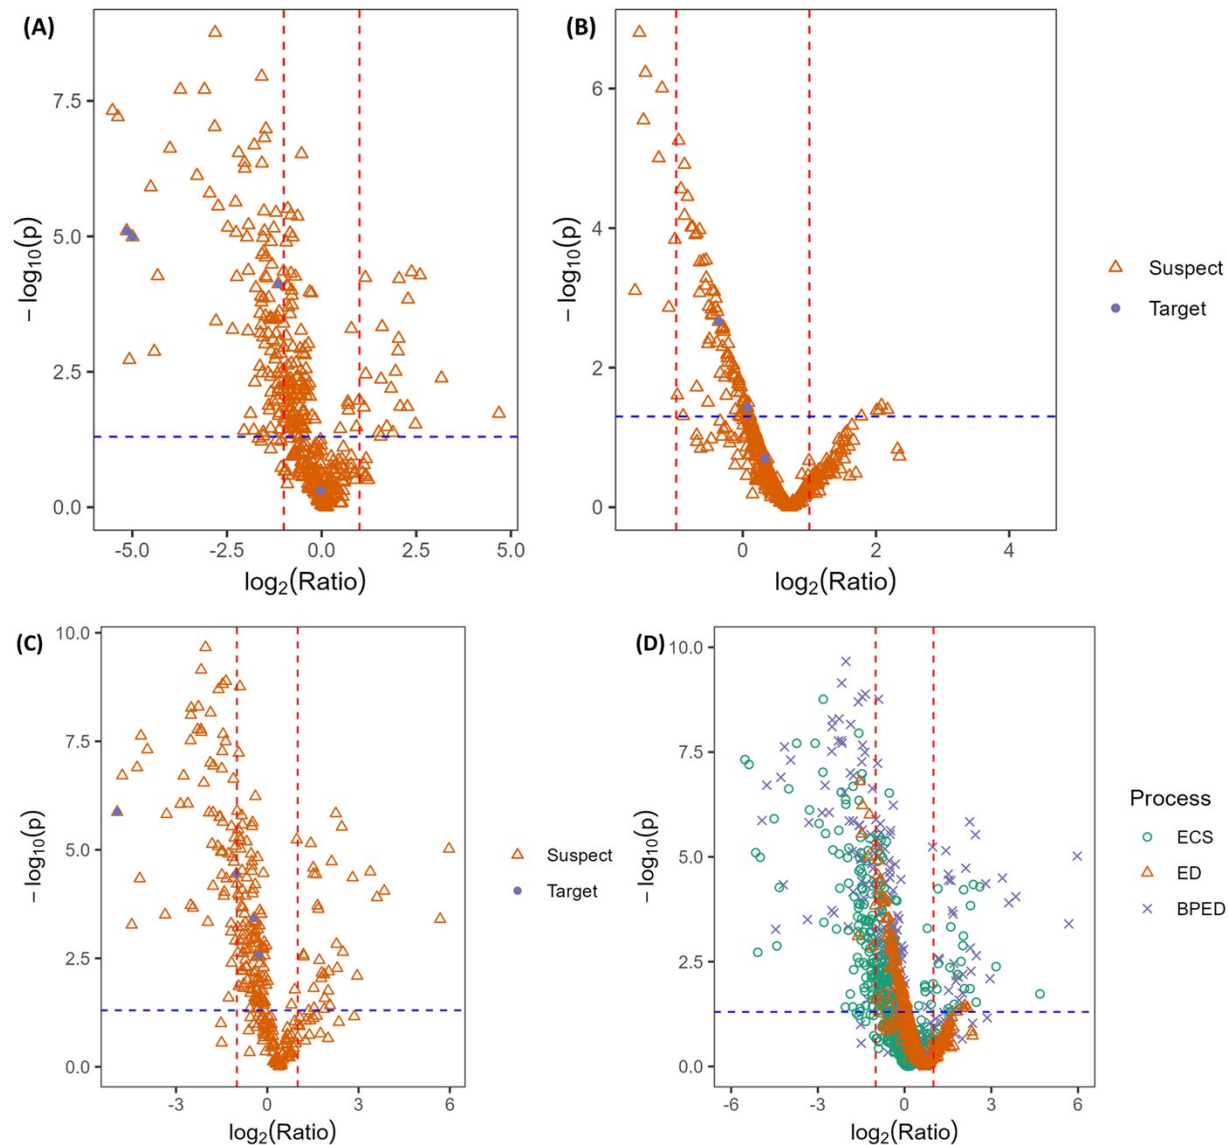

Figure S2-6. Volcano plots for removal ratio for ECS (A), ED (B), and BPED (C) as calculated for each of the target pharmaceuticals and all features detected during suspect screening. Volcano plots for removal ratio overlaid for all processes (D) based on all features detected during suspect screening.

Table S2-5. *p*-values for comparison between ratios calculated for processes based on all suspect data and feature intensity for targets determined via suspect screening. Statistically significant differences (*p*-values < 0.05) are highlighted in yellow. Pairwise Wilcox tests were used to compare data because the datasets were generally not normally distributed and did not have similar variances.

|              | Target Data      |               | Suspect Data     |               |
|--------------|------------------|---------------|------------------|---------------|
|              | Enrichment Ratio | Removal Ratio | Enrichment Ratio | Removal Ratio |
| ECS vs. ED   | -                | 0.0024        | 7.87E-07         | 1.67E-168     |
| ECS vs. BPED | 0.0016           | 0.1359        | 0.1050           | 5.28E-18      |
| ED vs. BPED  | -                | 0.0024        | 1.58E-07         | 1.84E-57      |

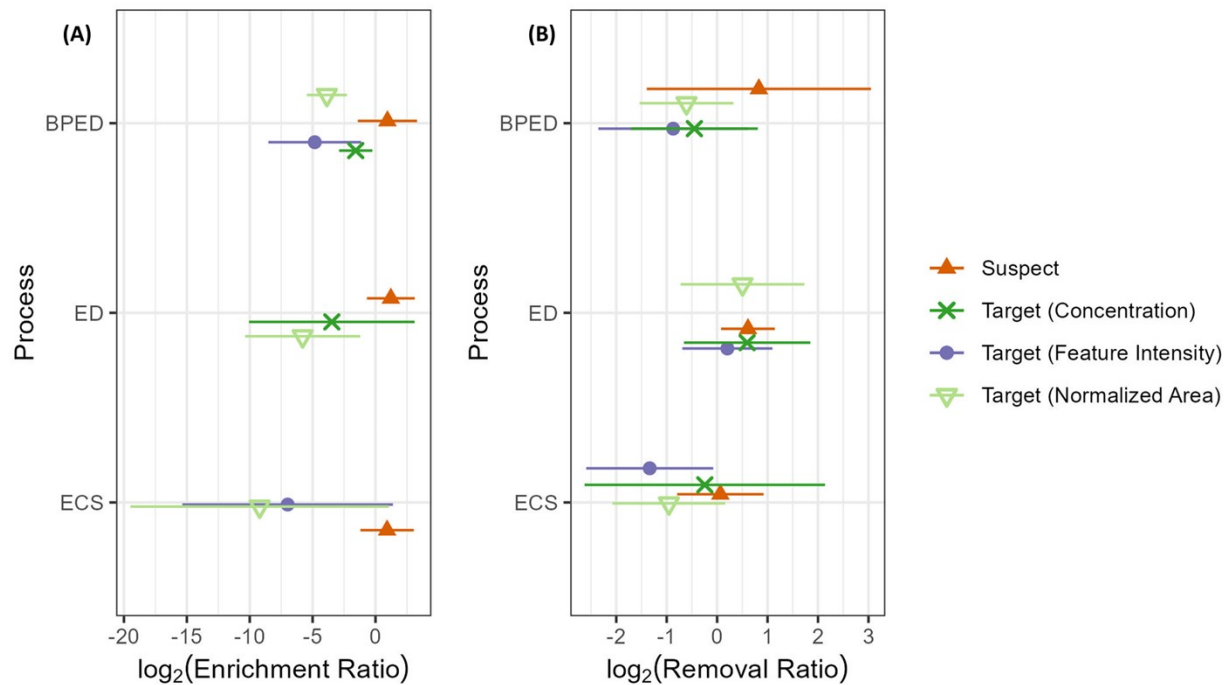

Figure S2-7. Average enrichment (A) and removal (B) ratios calculated for all features detected during suspect screening (orange), for features identified as target compounds during suspect screening (purple) and for target compounds quantified separately via target analysis (two shades of green). For target compounds quantified via target analysis, ER and RR were calculated in two ways: (1) using concentrations determined by target analysis and (2) using the peak area for the target compound normalized to the peak area for the respective internal standard. For ECS, no ER based on target concentrations is shown because the concentrations were determined to be below method LOQ/LOD. No average ER for targets is shown for ED because none of the features detected in the product chamber were identified as target compounds during suspect screening. Results of statistical analysis for comparisons of ratios calculated using different methods are shown in Table S2-7.

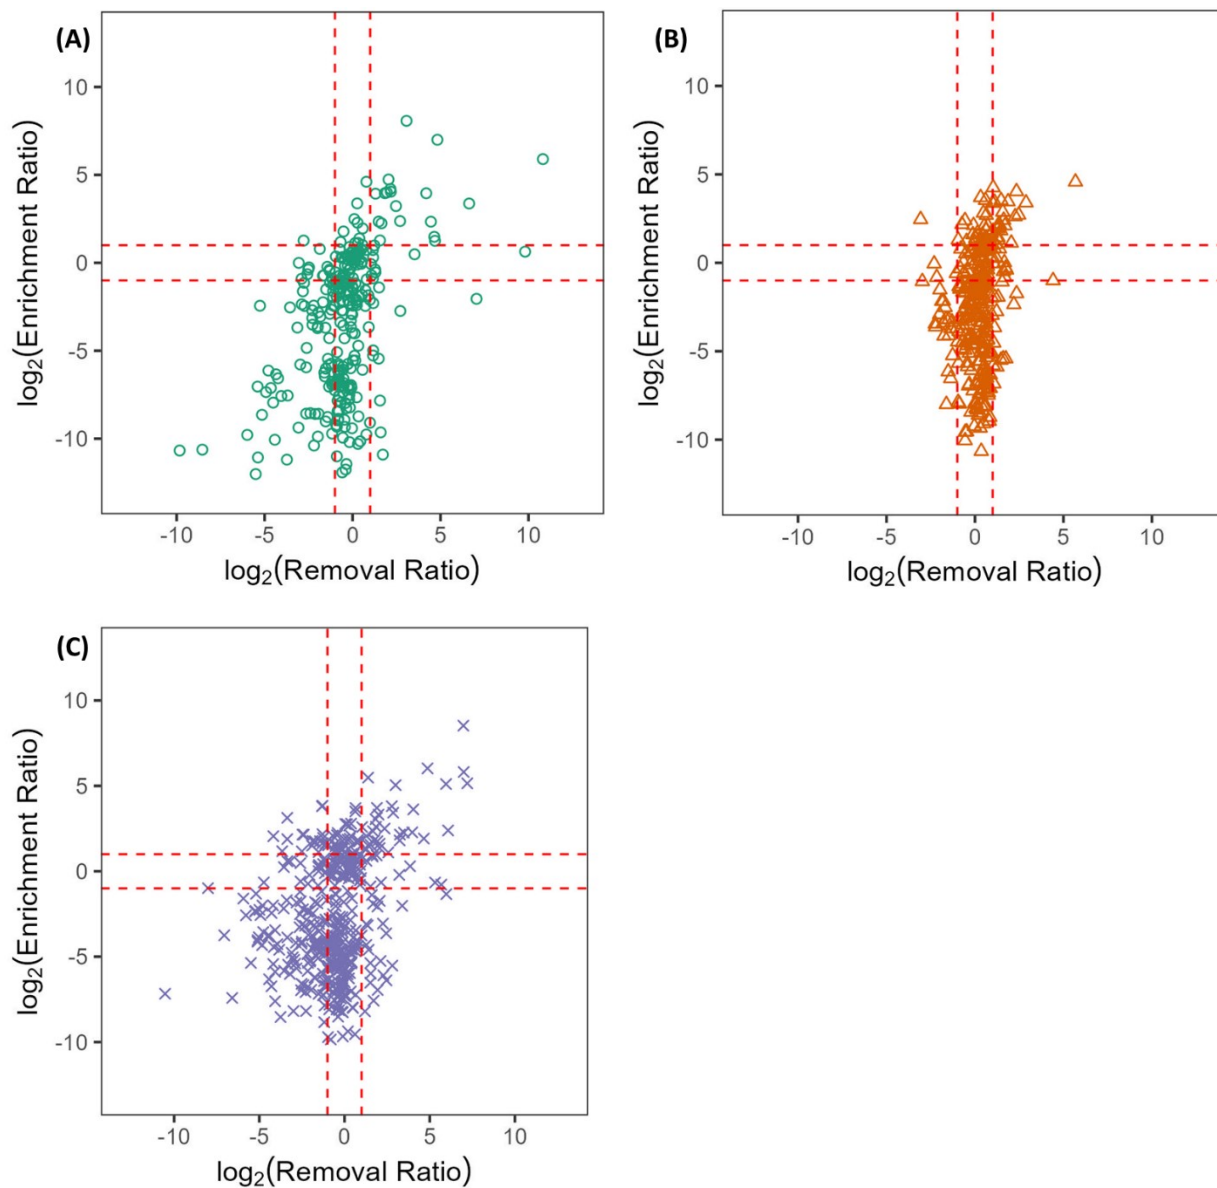

Figure S2-8. Enrichment ratio vs. removal ratio for ECS (A), ED (B), and BPED (C) for all features detected during suspect screening.

Table S2-6. *p*-values for comparison between ratios calculated from target and suspect screening data for each process. Statistically significant differences (*p*-values < 0.05) are highlighted in yellow. Pairwise Wilcoxon tests were used to compare data because the datasets were generally not normally distributed and did not have similar variances.

|                  | ECS    | ED     | BPED     |
|------------------|--------|--------|----------|
| Enrichment Ratio | 0.0002 | -      | 2.94E-07 |
| Removal Ratio    | 0.0004 | 0.0460 | 0.0038   |

Table S2-7. *p*-values for comparison between ratios calculated for target data for each process using different calculation methods. Statistically significant differences (*p*-values < 0.05) are highlighted in yellow. Pairwise Wilcoxon tests were used to compare data because the datasets were generally not normally distributed and did not have similar variances.

|                                                 | ECS    | ED     | BPED   |
|-------------------------------------------------|--------|--------|--------|
| <b>Enrichment Ratio</b>                         |        |        |        |
| Suspect screening intensity vs. normalized area | 0.3355 | -      | 0.0007 |
| Suspect screening intensity vs. concentration   | -      | -      | 0.6805 |
| Normalized area vs. concentration               | -      | 0.0113 | 0.0062 |
| <b>Removal Ratio</b>                            |        |        |        |
| Suspect screening intensity vs. normalized area | 0.1618 | 0.0262 | 0.6652 |
| Suspect screening intensity vs. concentration   | 0.0012 | 0.0225 | 0.3491 |
| Normalized area vs. concentration               | 0.0905 | 0.9214 | 0.6552 |

### 2.3 Product Purity

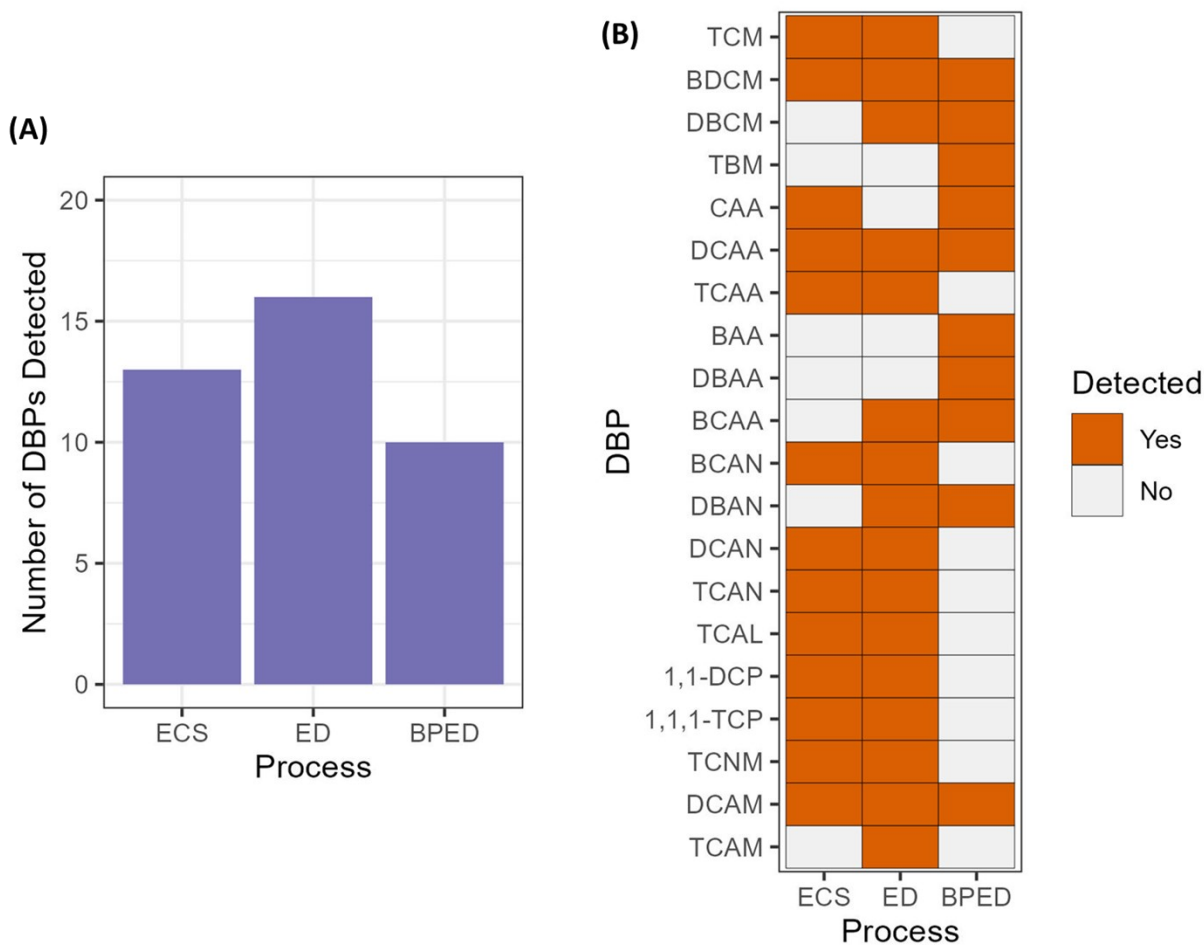

Figure S2-9. Disinfection byproducts detected in anode chambers. (A) Number of DBPs detected for each process. (B) Identity of DBPs detected.

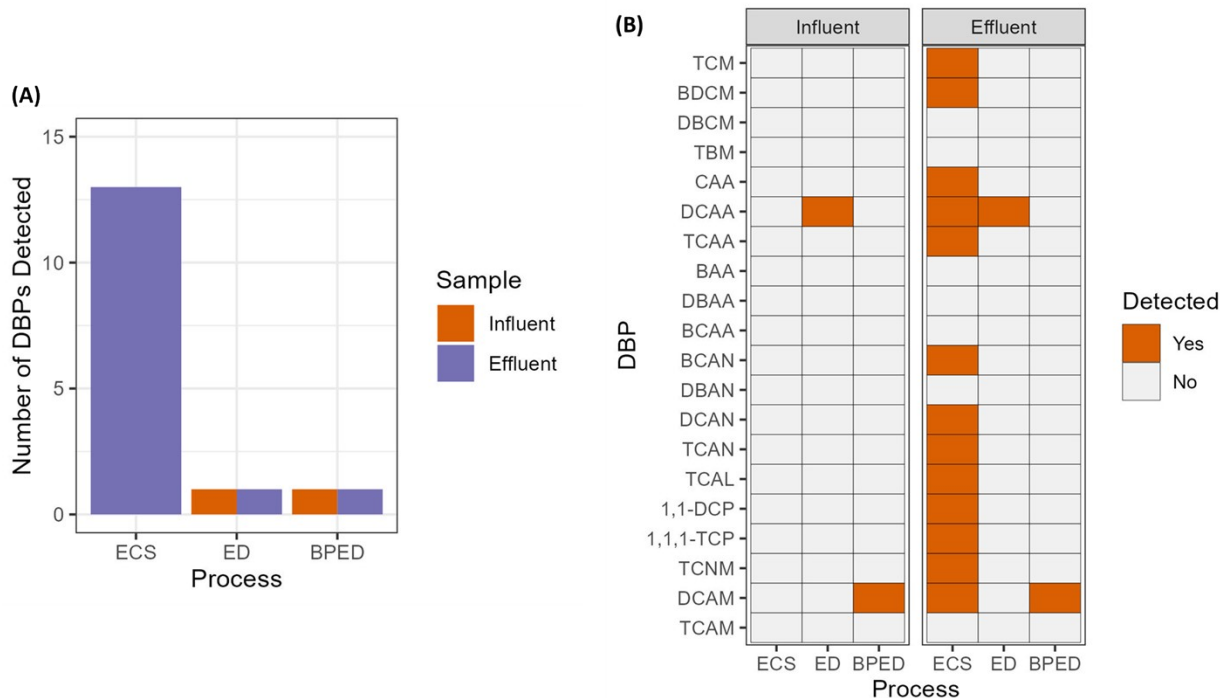

Figure S2-10. Disinfection byproducts detected in influent and treated urine. (A) Number of DBPs detected for each process. (B) Identity of DBPs detected.

Despite little DBP migration to products in all processes, significant DBP formation occurred in the anode chambers (Figure S2-9). All classes of DBPs were detected in the anode chamber for ED, and all except HNMs and HALs were detected in the anode chamber of BPED. In ED, chloride ions readily transferred from the diluate chamber to the anode chamber via electro-migration across the AEM (Figure 1B) and could then be oxidized at the anode. The observed DBP concentrations were greater than in ECS despite operating ED for only 4 hours (vs. 12 hours for ECS). Therefore, a greater proportion of the current passed through the system was likely consumed by chloride oxidation in ED than in ECS possibly because there were fewer other species present in the anolyte (0.1 M Na<sub>2</sub>SO<sub>4</sub> vs. urine) that could interact with the electrode. With extended operation and continued recirculation of the anolyte, DBP formation in the anode chamber of ED would likely change in rate and types of compounds formed as the anolyte continues to accumulate chloride ions and organic species due to transmembrane migration of organics and buildup of DBPs in the anolyte. This accumulation of contaminants could result in diffusion of DBPs and other transformation products into the diluate chamber, affecting the quality of treated urine.

For BPED, mainly HAAs and THMs, and to a lesser extent HANs, formed in the anode. Therefore, the BPM separating the anode and diluate chambers appeared to be only partially effective in preventing ion and organic crossover from the diluate chamber to the anode chamber or the BPM released DBP precursors. Neutral organic molecules, such as organic acids at low pH conditions existing in urine during BPED, can accumulate in the low-pH cation exchange layer of the BPM by diffusion.<sup>132,133</sup> Neutral molecules can continue diffusing through the anion exchange layer, and deprotonation could also occur due to the high pH in this part of the BPM, enhancing transport of

negatively charged organics toward the anode. Amino acids are known precursors of HAAs<sup>134</sup> and found in urine,<sup>135</sup> which could explain HAA formation in BPED. DBP formation in the anode Chambers of ED and BPED illustrated the importance of considering systems-scale management of DBPs, rather than focusing only on product and effluent urine characteristics.

Speciation of DBPs in the anolyte (urine for ECS and 0.1 M Na<sub>2</sub>SO<sub>4</sub> for ED and BPED) depended on chlorine concentrations, TAN concentrations, and pH. In ECS, TCM was the dominant THM, and the dominant HAAs were DCAA, followed by CAA and TCAA. DCAN was the dominant HAN, but TCAN was also observed. DCAM dominated HAMs, and for HKs, 1,1-DCP dominated over 1,1,1-TCP. Across groups, the less or intermediately chlorinated species dominated, and brominated DBPs were not detected in ECS-treated urine. For ED, as for ECS, TCM was the dominant THM and DCAN was the dominant HAN. However, for HAAs, HAMs, and HKs, the more chlorinated species accounted for greater fractions than in ECS. DCAA remained dominant but TCAA became a larger fraction of total HAAs over time. DCAM and TCAM accounted for similar fractions of total HAMs over time, and 1,1-DCP and 1,1,1-TCP accounted for similar fractions of HKs over time. The fact that more chlorinated species dominated in ED compared to ECS despite shorter operation of ED could be a result of a greater ratio of chloride ions ( $1,660 \pm 370$  mg/L in ED vs.  $1,410 \pm 26$  mg/L in ECS at final time) to precursor organic compounds ( $812$  mg/L COD in ED vs.  $2,790 \pm 52$  mg/L COD in ECS at final time) in the ED anolyte than in urine, effectively equivalent to a greater free chlorine dose.<sup>136,137</sup> In ECS, HOCl/OCl<sup>-</sup> generated by chloride oxidation could react with NH<sub>3</sub>/NH<sub>4</sub><sup>+</sup> to form monochloramine while these reactions are unlikely in ED due to the absence of TAN in the anode chamber. Reactions of organics with chlorine and chloramines favor formation of different DBPs; for example, oxidation with monochloramines can lead to greater 1,1-DCP formation than oxidation with free chlorine, and formation of trichlorinated species, such as 1,1,1-TCP, is less likely with monochloramines than free chlorine.<sup>138</sup> Conducting experiments with synthetic urine containing model DBP precursors could provide additional insights into the mechanisms at play.

In BPED, brominated DBPs played a significant role in the anode unlike in ECS and ED. TBM was the dominant THM, with BDCM and DBCM also detected. BAA and DBAA were the dominant HAAs, and DBAN was the dominant HAN. The greater occurrence of brominated DBPs in BPED than in ECS and ED increased concerns because brominated species are often more toxic than chlorinated analogues.<sup>139</sup> Bromide concentrations in urine and all reactor chambers were below detection (< 1 mg/L). The BPM was the only unique component to the reactor for BPED, suggesting that the formation of brominated DBPs could be related to the BPM, which showed some blistering and delamination after use (Figure S2-11). According to the manufacturer, the BPM (Fumasep FBM) consisted of sulfonated cross-linked poly-ether-ether-ketone (PEEK) as the cation exchange layer, a polysulfone with bicyclic amines as the anion exchange layer, and a polyacrylic acid/polyvinyl pyridine salt complex in the junction.<sup>140</sup> Therefore, its degradation would not have been expected to be a bromine source unless bromine-containing compounds were used during membrane synthesis and impurities remained. Despite visual evidence, degradation did not appear to allow significant mixing between Chambers 1 and 2 based on chloride, sulfate, and phosphate ion concentrations (Figure S2-12, Figure S2-13, Figure S2-14). The BPM was loaded with Na<sup>+</sup> and Cl<sup>-</sup> in the cation and anion exchange layers, respectively,<sup>141</sup> and stored in

NaCl solution. Even though the BPM was rinsed and immersed in water for at least 12 hours before experiments, Na<sup>+</sup> and Cl<sup>-</sup> ions likely remained inside the membrane, contributing to the measurable chloride concentration and chlorinated DBPs in Chamber 1 (Figure S2-12, Figure S2-9). Further investigation, including membrane characterization (e.g., scanning electron microscopy with energy dispersive x-ray spectroscopy, Fourier Transform Infrared Spectroscopy), is needed to understand membrane degradation and explain the unique formation of brominated DBPs in BPED.

DBPs pose a greater risk to effluent urine quality in ECS than ED and BPED (Figure S2-10). Although BPED and ECS were operated longer than ED (12 hours vs. 4 hours) and achieved greater TAN removal/recovery, comparing DBP occurrence at the final timepoints for each process is worthwhile because the final times represented the maximum DBP formation and TAN treatment given the study's experimental conditions. At least one species in each class of quantified DBPs, including regulated DBPs like HAAS and DCAN, was detected in urine treated by ECS. In contrast, for ED, only HAAs and HAMs were detected in the urine, and for BPED, only HAAs, HAMs, HKs, and THMs were detected in urine. In ECS, urine was directly exposed to the anode, while in ED and BPED, urine was separated from the anode by an anion exchange membrane (AEM) and a bipolar membrane (BPM), respectively. Therefore, chloride could be readily oxidized to chlorine at the anode, leading to the formation of hypochlorite. The active chlorine species could easily react with organic compounds in urine because the chamber was well-mixed. Initial and final chloride concentrations were similar ( $1,840 \pm 69$  initial vs.  $1,410 \pm 26$  mg/L final,  $p$ -value = 0.0477), indicating only a small proportion of chloride was oxidized (Figure S2-12A). Given that separation of anodes from urine by a membrane in ED and BPED mitigated DBP formation in urine, such a reactor architecture would be beneficial in ECS.

Other approaches for DBP mitigation can prevent their formation or remove DBPs after formation. To prevent formation, DBP precursors could be removed from urine before electrochemical treatment (e.g., using ion exchange for chloride ions). Membranes to separate electrodes from urine could be combined with using alternative redox couples (e.g., iron-based with graphite electrodes<sup>142</sup>) instead of water splitting to both reduce DBP formation and energy consumption. Controlling operational parameters (e.g., applied current density, residence time in chambers, duration of treatment) could also reduce DBP formation, as could improved electrode designs.<sup>67</sup> Another strategy for preventing DBP formation is introducing influent urine to the cathode chamber instead of the anode chamber for ECS.<sup>143</sup> This configuration would prevent urine from being exposed to an oxidizing environment but could lead to other challenges, such as fouling of the gas permeable membrane and product contamination with small, volatile compounds present in the influent. If strategies for preventing DBP formation are ineffective or not practical, post-treatment with activated carbon can remove halogenated organics, while ion exchange or membrane filtration could remove inorganic DBPs (e.g., chlorate, perchlorate, bromate).<sup>25,67</sup> Electrochemical nutrient recovery technologies could also be coupled with electrochemical dehalogenation or reduction technologies to remove DBPs.<sup>67</sup>

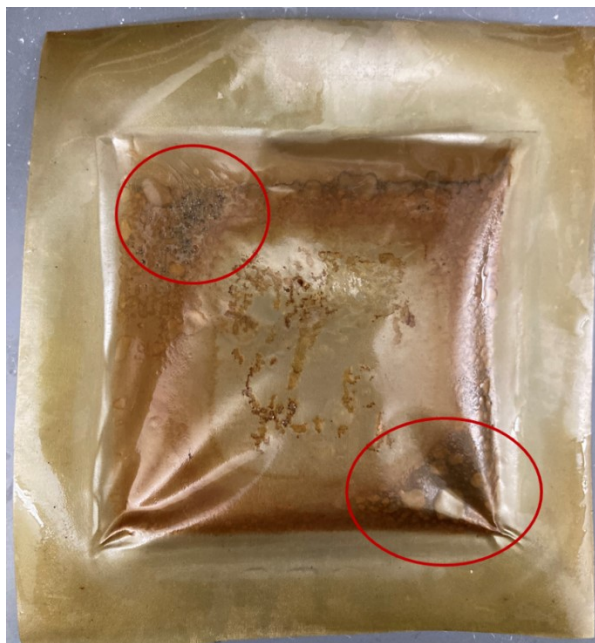

Figure S2-11. Photo of bipolar membrane after use during BPED experiment. Two example areas showing blistering and delamination are circled in red.

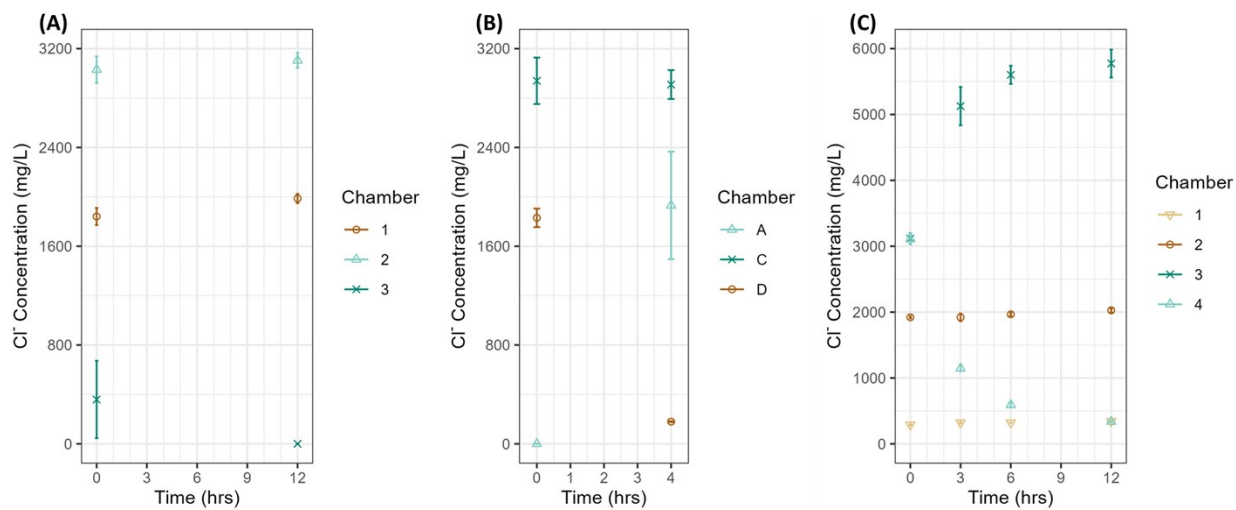

Figure S2-12. Chloride concentrations in all chambers for ECS (A), ED (B), and BPED (C). The concentrations shown account for volume reduction due to sample collection throughout experiments.

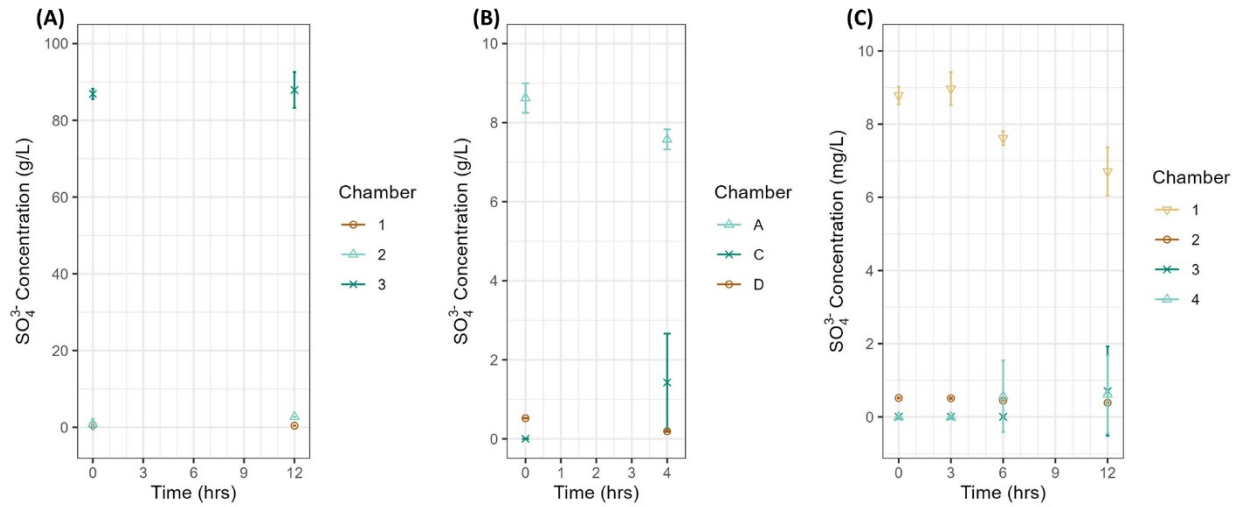

Figure S2-13. Sulfate concentrations in all chambers for ECS (A), ED (B), and BPED (C). The concentrations shown account for volume reduction due to sample collection throughout experiments.

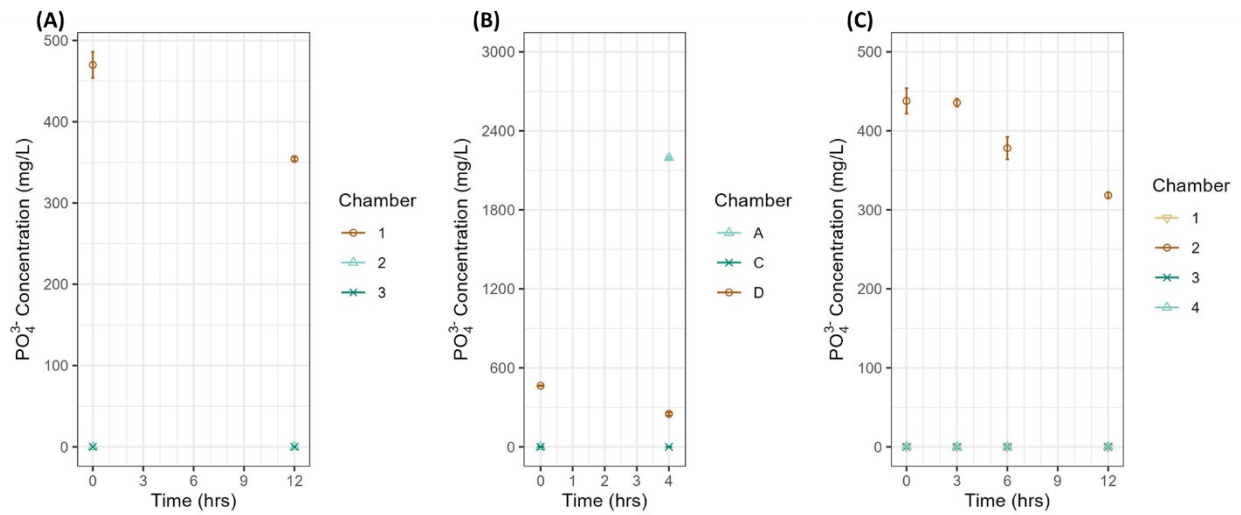

Figure S2-14. Phosphate concentrations in all chambers for ECS (A), ED (B), and BPED (C). The concentrations shown account for volume reduction due to sample collection throughout experiments.

## 2.4 Identification of Priority Compounds

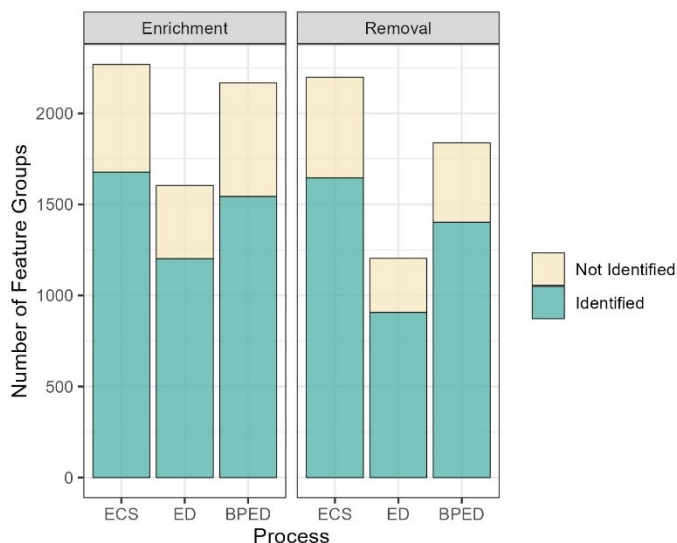

Figure S2-15. Fraction of all detected feature groups identified during suspect screening.

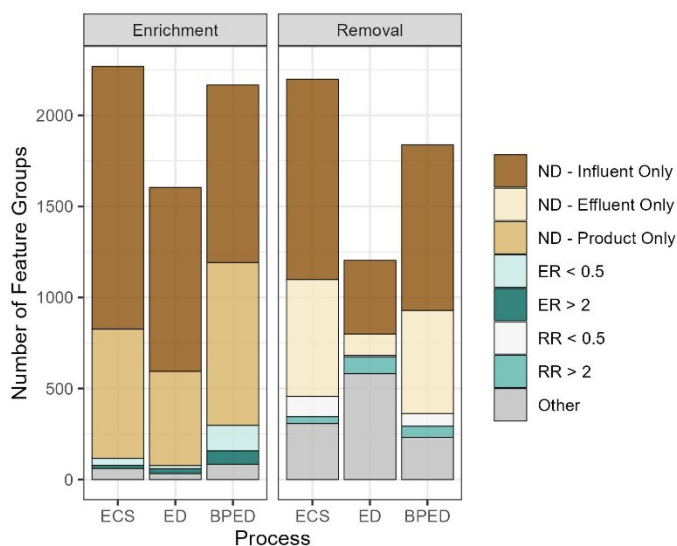

Figure S2-16. Fraction of priority compounds (enrichment ratio less than 0.5 or greater than 2, removal ratio less than 0.5 or greater than 2, and  $p$ -value less than 0.05) and fraction of non-detects (either influent only or effluent only). Feature groups labeled as "Other" were detected in both paired samples (i.e., influent and effluent or influent and product) but exhibited ER or RR values between 0.5 and 2 and/or had  $p$ -values greater than 0.05. Feature groups were discarded from analysis if they were detected in more than zero but less than 7 of 9 or 5 of 6 replicate samples. The discarded feature groups based on ER accounted for 83% (10,730 of 12,998), 91% (16,679 of 18,283), and 87% (14,627 of 16,794) of feature groups for ECS, ED, and BPED, respectively. The discarded feature groups based on RR accounted for 83% (10,799 of 12,998), 93% (17,079 of 18,283), and 89% (14,956 of 16,794) of feature groups for ECS, ED, and BPED, respectively.

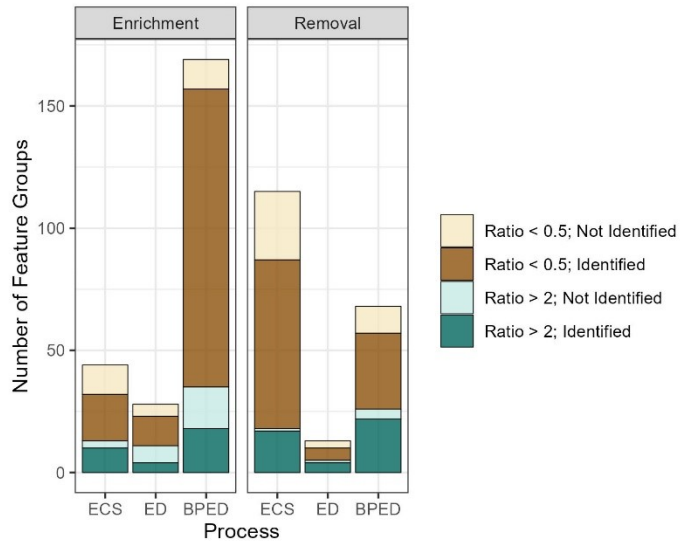

Figure S2-17. Fraction of priority feature groups identified during suspect screening.

Table S2-8. Priority compounds identified through suspect screening.

Table S2-8 is included as an Excel spreadsheet: Kogler\_et\_al\_priorityCompoundIDs\_TableS2-7.xlsx.

Table S2-9. Properties of identified compounds categorized as priority compounds based on ER for multiple processes. Properties were taken from Pubchem unless otherwise indicated.

| Category                        | Compound                                                             | MW (g/mol) | pKa                               | K <sub>H</sub> (atm·m <sup>3</sup> /mol) | log K <sub>ow</sub> | Structure |
|---------------------------------|----------------------------------------------------------------------|------------|-----------------------------------|------------------------------------------|---------------------|-----------|
| BPED & ED,<br>ER > 2            | Linoleic acid                                                        | 280.4      | 4.77                              | 2.0x10 <sup>-7</sup>                     | 7.05                |           |
| BPED & ED,<br>ER > 2            | Ricinoleic acid                                                      | 298.5      | 4.74                              | -                                        | 6.19                |           |
| BPED & ED,<br>ER > 2            | Methyl ricinoleate                                                   | 312.5      | -                                 | 1.47x10 <sup>-7</sup>                    | 6.48                |           |
| BPED & ED,<br>ER < 0.5          | Carbamazepine                                                        | 236.27     | ~1,<br>13.9 <sup>116</sup>        | 1.1x10 <sup>-10</sup>                    | 2.45                |           |
| BPED & ED,<br>ER < 0.5          | Bakuchiol                                                            | 256.4      | -                                 | -                                        | -                   |           |
| ECS & BPED,<br>ER > 2           | Ne-Boc-L-lysine                                                      | 110.2      | 2.53 ~9-<br>10 <sup>101,102</sup> | -                                        | -                   |           |
| ECS & BPED,<br>ER < 0.5         | (2E,6Z)-N-ethylnona-2,6-dienamide                                    | 181.27     | -                                 | -                                        | -                   |           |
| ECS & BPED,<br>ER < 0.5         | Benzylideneacetone                                                   | 146.19     | -                                 | -                                        | -                   |           |
| ECS & BPED,<br>ER < 0.5         | beta-Damascenone                                                     | 190.28     | -                                 | -                                        | -                   |           |
| ECS, ER > 2 &<br>BPED, ER < 0.5 | Pinonic acid                                                         | 184.23     | 4.82                              | -                                        | -                   |           |
| ECS & ED,<br>ER > 2             | 1,4-dimethyl-2,3,4,5,6,7-hexahydro-1h-1,6-methano-4-benzazonin-10-ol | 231.33     | -                                 | -                                        | -                   |           |
| ECS & ED,<br>ER < 0.5           | Bicyclo(2.2.2)octane                                                 | 110.2      | -                                 | -                                        | -                   |           |

Several priority compounds had  $RR < 0.5$ , indicating high extent of removal from urine, for ECS and BPED: hexadecyl 4-chloro-3-[2-(5,5-dimethyl-2,4-dioxo-1,3-oxazolidin-3-yl)-4,4-dimethyl-3-oxopentamido]benzoate; linalool; lidocaine; 3-pyridin-3-ylpropyl (2S)-1-(3,3-dimethyl-2-oxopentanoyl)pyrrolidine-2-carboxylate; and levonorgestrel (Table S2-10). These compounds contain electron-rich groups (e.g., amines, aromatic rings, alkenes, alkynes, heterocycles), making them susceptible to reaction with electrophilic chlorine species that can form in Chamber 1 of ECS. Such degradation could have occurred in BPED due to potential loss of BPM integrity (see Section S2.3). Removal by electromigration is also possible for lidocaine due to protonation and a resulting positive charge at pH's below about 7.9. Two priority features with  $RR > 2$  for ECS and BPED were identified: 1,3-bis(2,2-dimethyl-1,3-dioxolan-4-ylmethyl)carbodiimide and 1-ethylpiperidine. The high RR indicates that these compounds are degradation products and/or that they are not degraded or transported out of the urine. 1-Ethylpiperidine is an intermediate in pharmaceutical synthesis, suggesting that it could be a degradation product of pharmaceuticals.

Table S2-10. Properties of identified compounds categorized as priority compounds based on RR for BPED and ECS. Properties were taken from Pubchem unless otherwise indicated.

| Category | Compound                                                                                                  | MW (g/mol) | pKa         | K <sub>H</sub> (atm·m <sup>3</sup> /mol) | log K <sub>ow</sub> | Structure                                                                             |
|----------|-----------------------------------------------------------------------------------------------------------|------------|-------------|------------------------------------------|---------------------|---------------------------------------------------------------------------------------|
| RR < 0.5 | Hexadecyl 4-chloro-3-[2-(5,5-dimethyl-2,4-dioxo-1,3-oxazolidin-3-yl)-4,4-dimethyl-3-oxopentamido]benzoate | 649.3      | -           | -                                        | -                   | 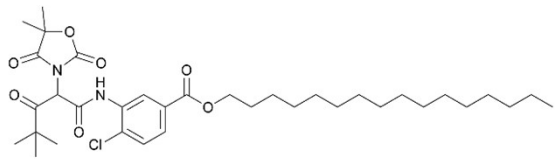   |
| RR < 0.5 | Linalool                                                                                                  | 154.25     | -           | 2.15x10 <sup>-5</sup>                    | 2.97                |    |
| RR < 0.5 | Lidocaine                                                                                                 | 234.34     | 7.86        | 1.3x10 <sup>-10</sup>                    | 2.44                |    |
| RR < 0.5 | 3-pyridin-3-ylpropyl (2S)-1-(3,3-dimethyl-2-oxopentanoyl)pyrrolidine-2-carboxylate                        | 360.4      | -           | -                                        | -                   |    |
| RR < 0.5 | Levonorgestrel                                                                                            | 312.4      | -1.5, 17.91 | 7.7x10 <sup>-10</sup>                    | 3.48                |   |
| RR > 2   | 1,3-Bis(2,2-dimethyl-1,3-dioxolan-4-ylmethyl)carbodiimide                                                 | 270.32     | -           | -                                        | -                   |  |
| RR > 2   | 1-Ethylpiperidine                                                                                         | 113.2      | 10.45       | -                                        | -                   |  |

Table S2-11. Uses of identified priority compounds, as indicated on PubChem.

| Category                       | Compound                                                                                                  | Use                                                                                                                  |
|--------------------------------|-----------------------------------------------------------------------------------------------------------|----------------------------------------------------------------------------------------------------------------------|
| Priority compound based on ER  | Linoleic acid                                                                                             | Component in topical medications and cosmetics, component of human diet                                              |
|                                | Ricinoleic acid                                                                                           | Cosmetic ingredient, contraceptive gel                                                                               |
|                                | Methyl ricinoleate                                                                                        | Cosmetic ingredient                                                                                                  |
|                                | Carbamazepine                                                                                             | Anticonvulsant drug, analgesic drug                                                                                  |
|                                | Bakuchiol                                                                                                 | Antimicrobial cosmetic                                                                                               |
|                                | Ne-Boc-L-lysine                                                                                           | Related to preparations of treatments for neoplasms, communicable diseases, diabetes, and other diseases             |
|                                | (2E,6Z)-N-ethylnona-2,6-dienamide                                                                         | Flavoring agent                                                                                                      |
|                                | Benzylideneacetone                                                                                        | Flavoring agent, fragrance                                                                                           |
|                                | beta-Damascenone                                                                                          | Flavoring agent, fragrance                                                                                           |
|                                | Pinonic acid                                                                                              | Related to preparation of drugs for toxemia, cyanosis, typhoid fever, and other conditions                           |
|                                | 1,4-dimethyl-2,3,4,5,6,7-hexahydro-1h-1,6-methano-4-benzazonin-10-ol                                      | Related to preparation of drugs for pain, neoplasms, and other conditions                                            |
| Bicyclo(2.2.2)octane           | Related to preparation of drugs for thrombosis, neoplasms, dementia, and other conditions                 |                                                                                                                      |
| Priority compounds based on RR | Hexadecyl 4-chloro-3-[2-(5,5-dimethyl-2,4-dioxo-1,3-oxazolidin-3-yl)-4,4-dimethyl-3-oxopentamido]benzoate | Photosensitizer                                                                                                      |
|                                | Linalool                                                                                                  | Flavoring agent, adjuvant, insecticide                                                                               |
|                                | Lidocaine                                                                                                 | Anesthetic, anti-arrhythmia drug                                                                                     |
|                                | 3-pyridin-3-ylpropyl (2S)-1-(3,3-dimethyl-2-oxopentanoyl)pyrrolidine-2-carboxylate                        | Parkinson disease drug (terminated)                                                                                  |
|                                | Levonorgestrel                                                                                            | Contraceptive drug, hormone therapy                                                                                  |
|                                | 1,3-Bis(2,2-dimethyl-1,3-dioxolan-4-ylmethyl)carbodiimide                                                 | Related to preparation of treatments for neoplasms, thrombosis, spontaneous platelet aggregation, and other diseases |
|                                | 1-Ethylpiperidine                                                                                         | Intermediate in chemical manufacturing                                                                               |

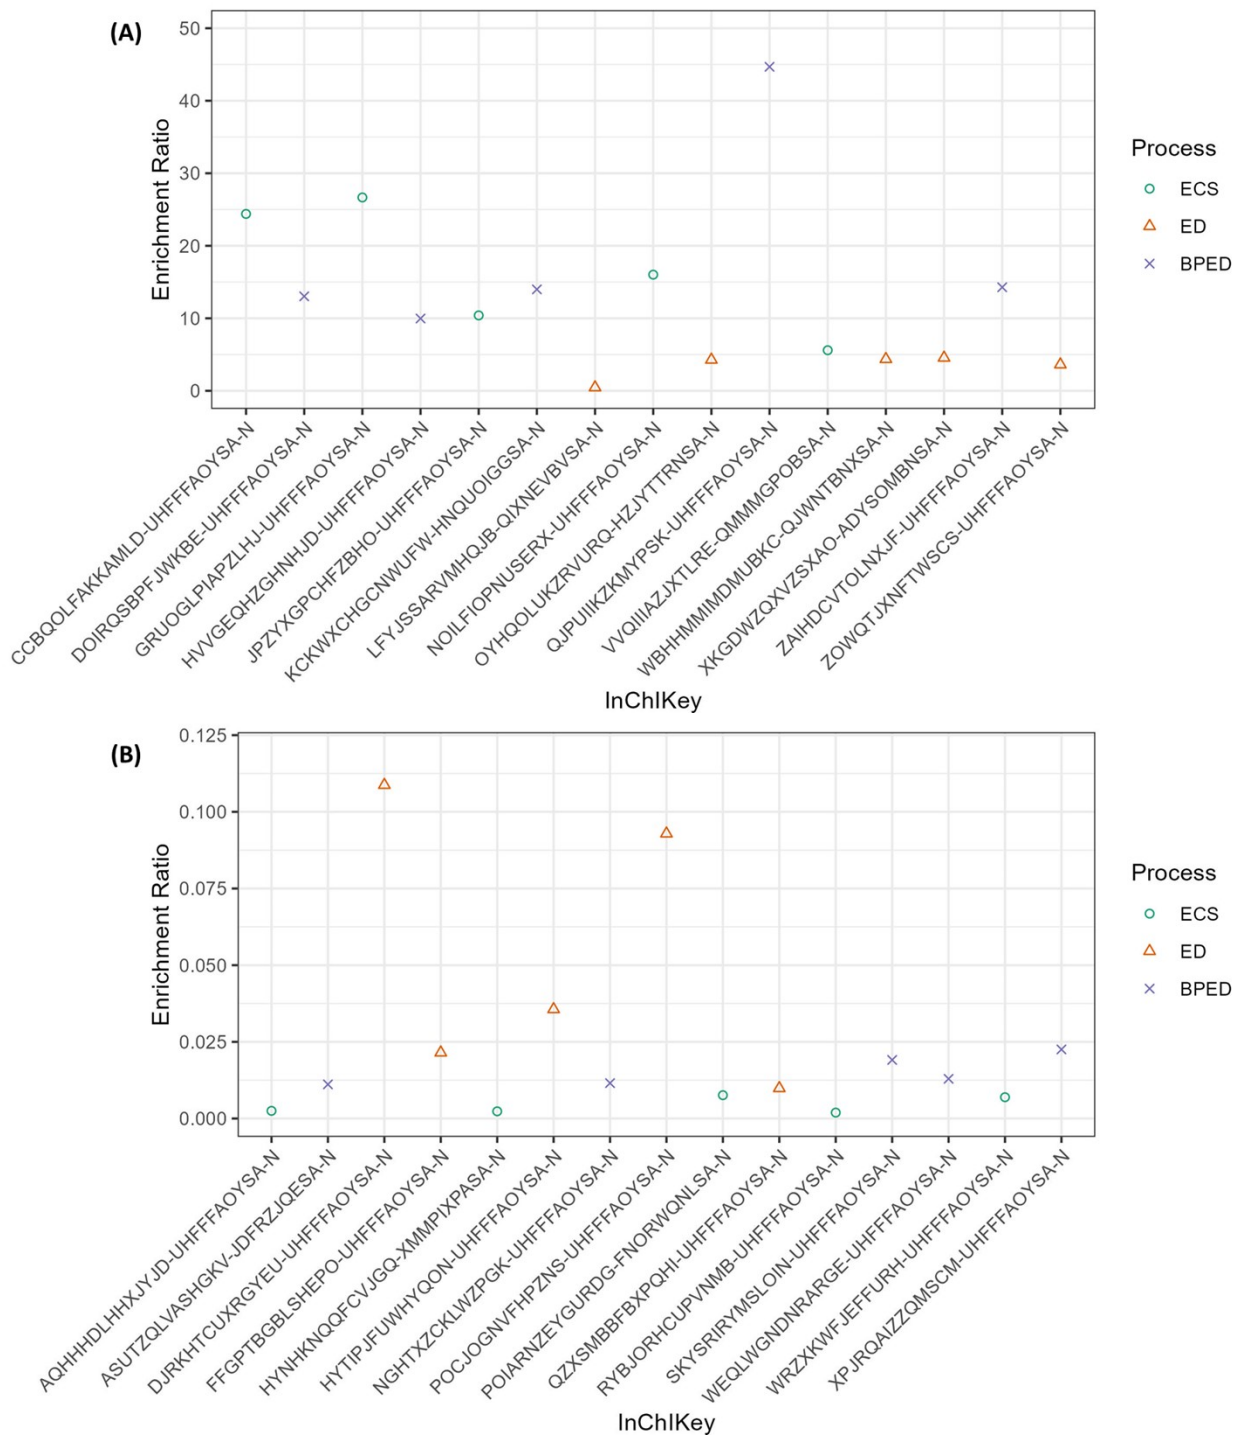

Figure S2-18. Extreme enrichment and removal ratios for priority features that were identified: highest 5 ERs (A), lowest 5 ERs (B), highest 5 RRs (C), and lowest 5 RRs (D) for each process.

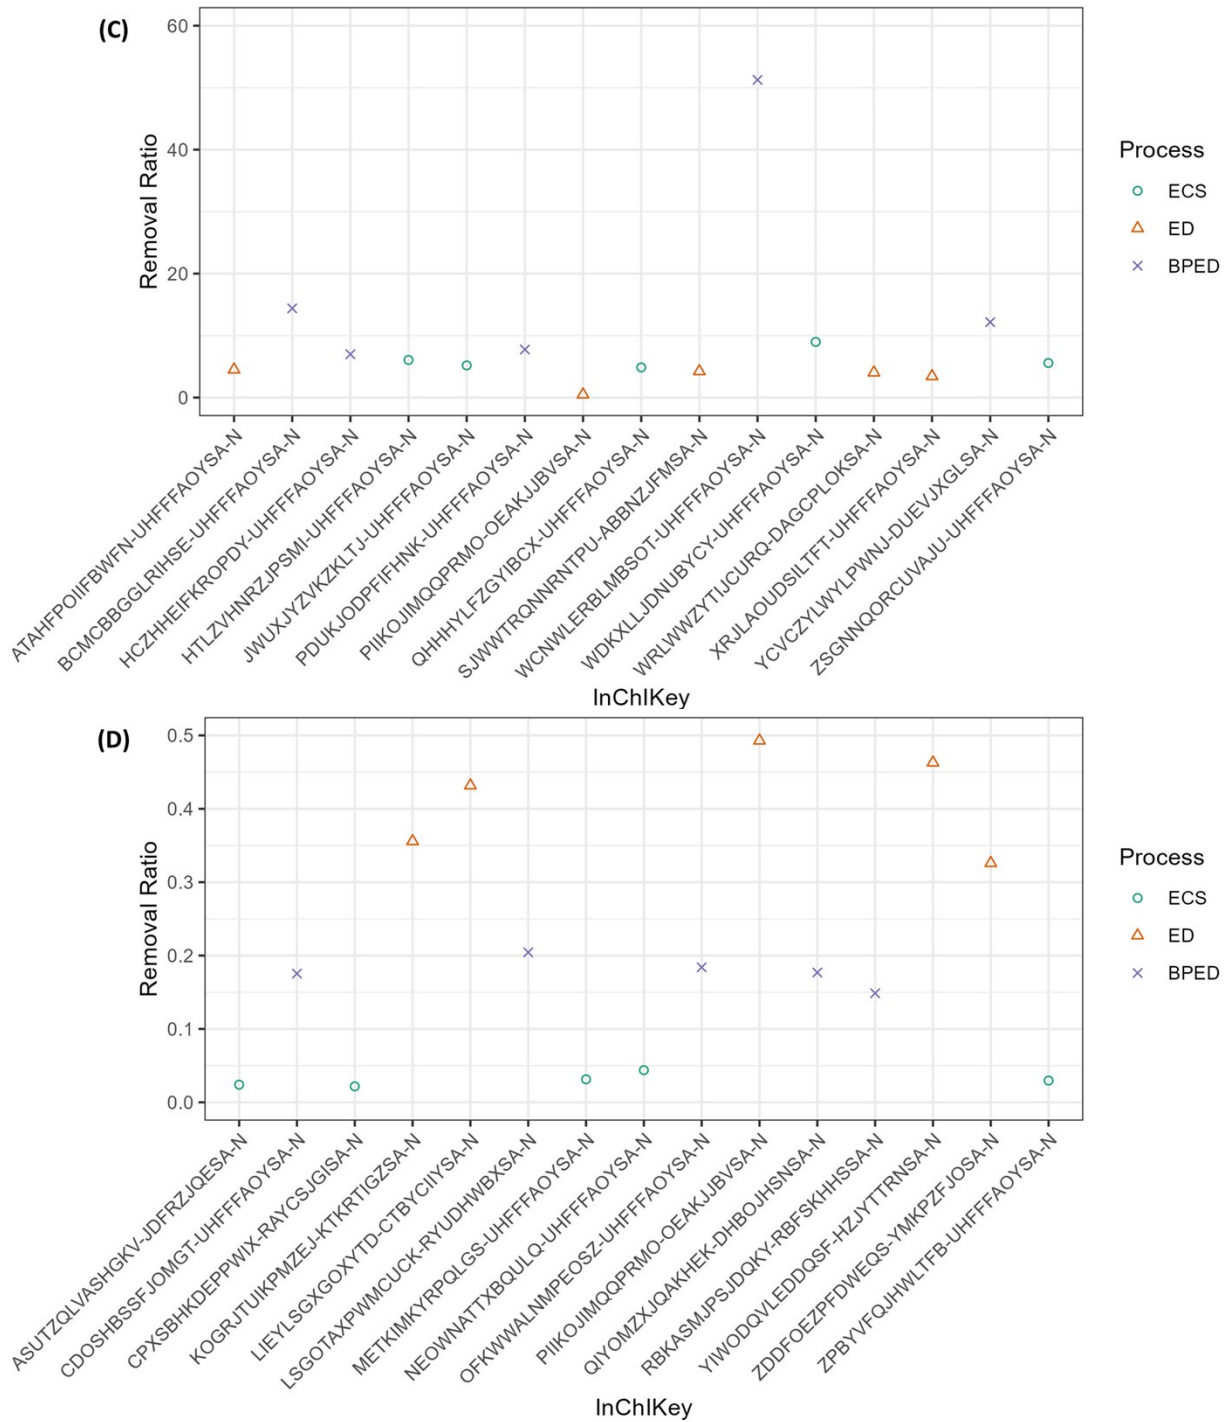

Figure S2-18. Extreme enrichment and removal ratios for priority features that were identified: highest 5 ERs (A), lowest 5 ERs (B), highest 5 RRs (C), and lowest 5 RRs (D) for each process. (continued)

## 2.5 Mechanistic Understanding of Compound Fate

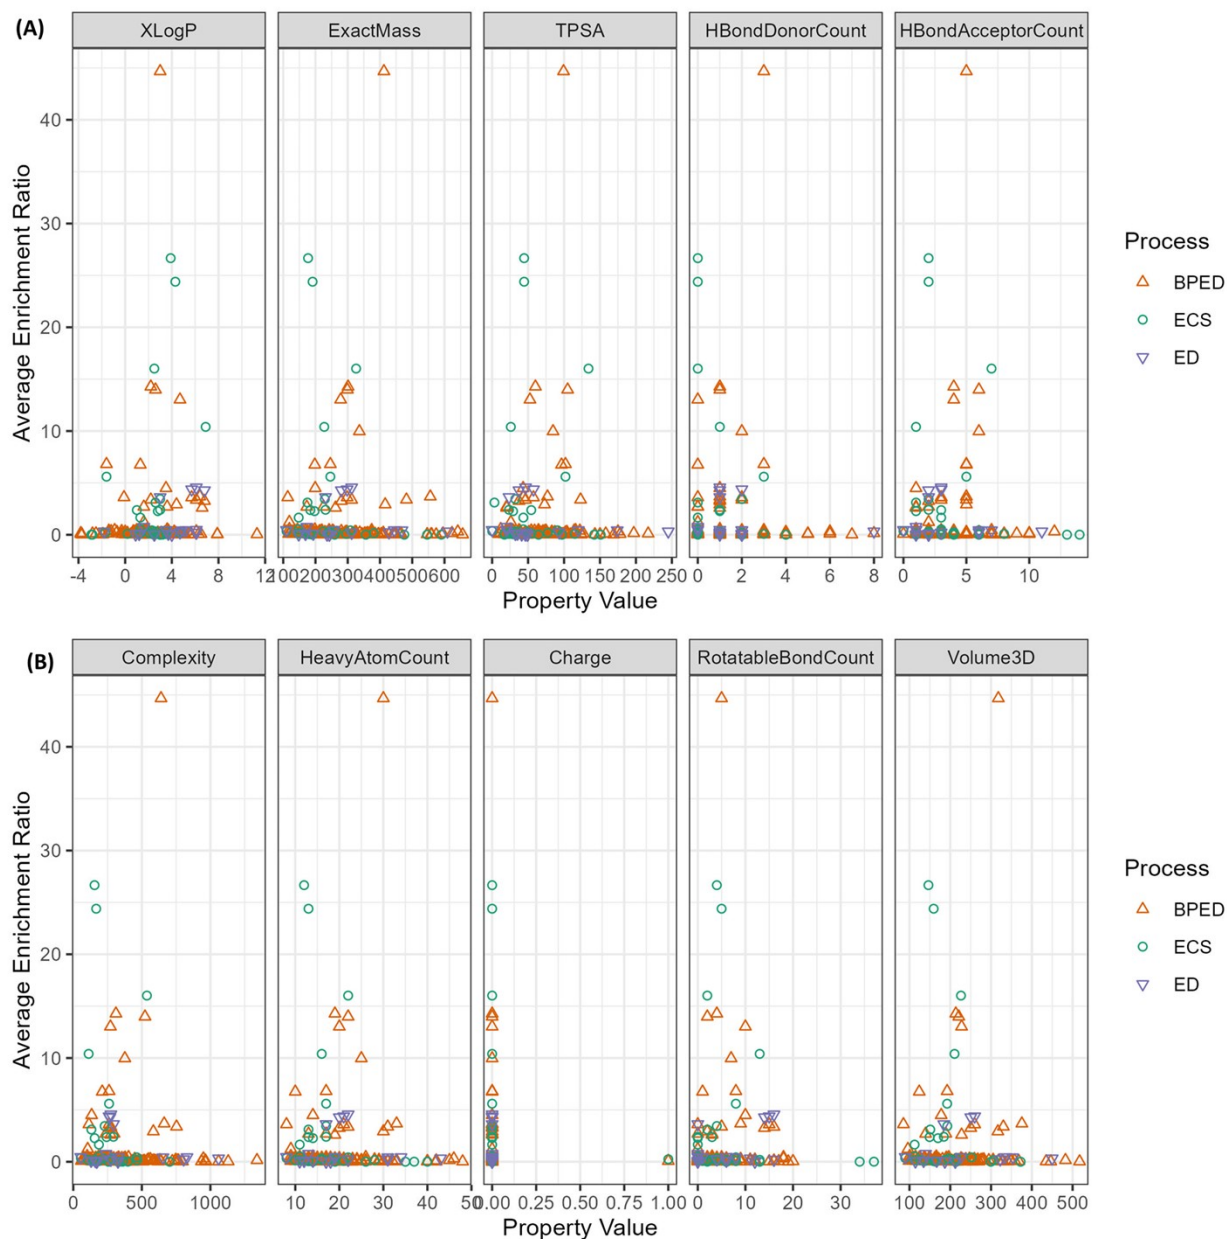

Figure S2-19. Relationships between compound properties and enrichment ratio for priority compounds. Figure 4 shows these relationships for the properties shown in panel A for ECS only. Spearman correlation and linear regression results are summarized in Table S2-12 and Table S2-13.

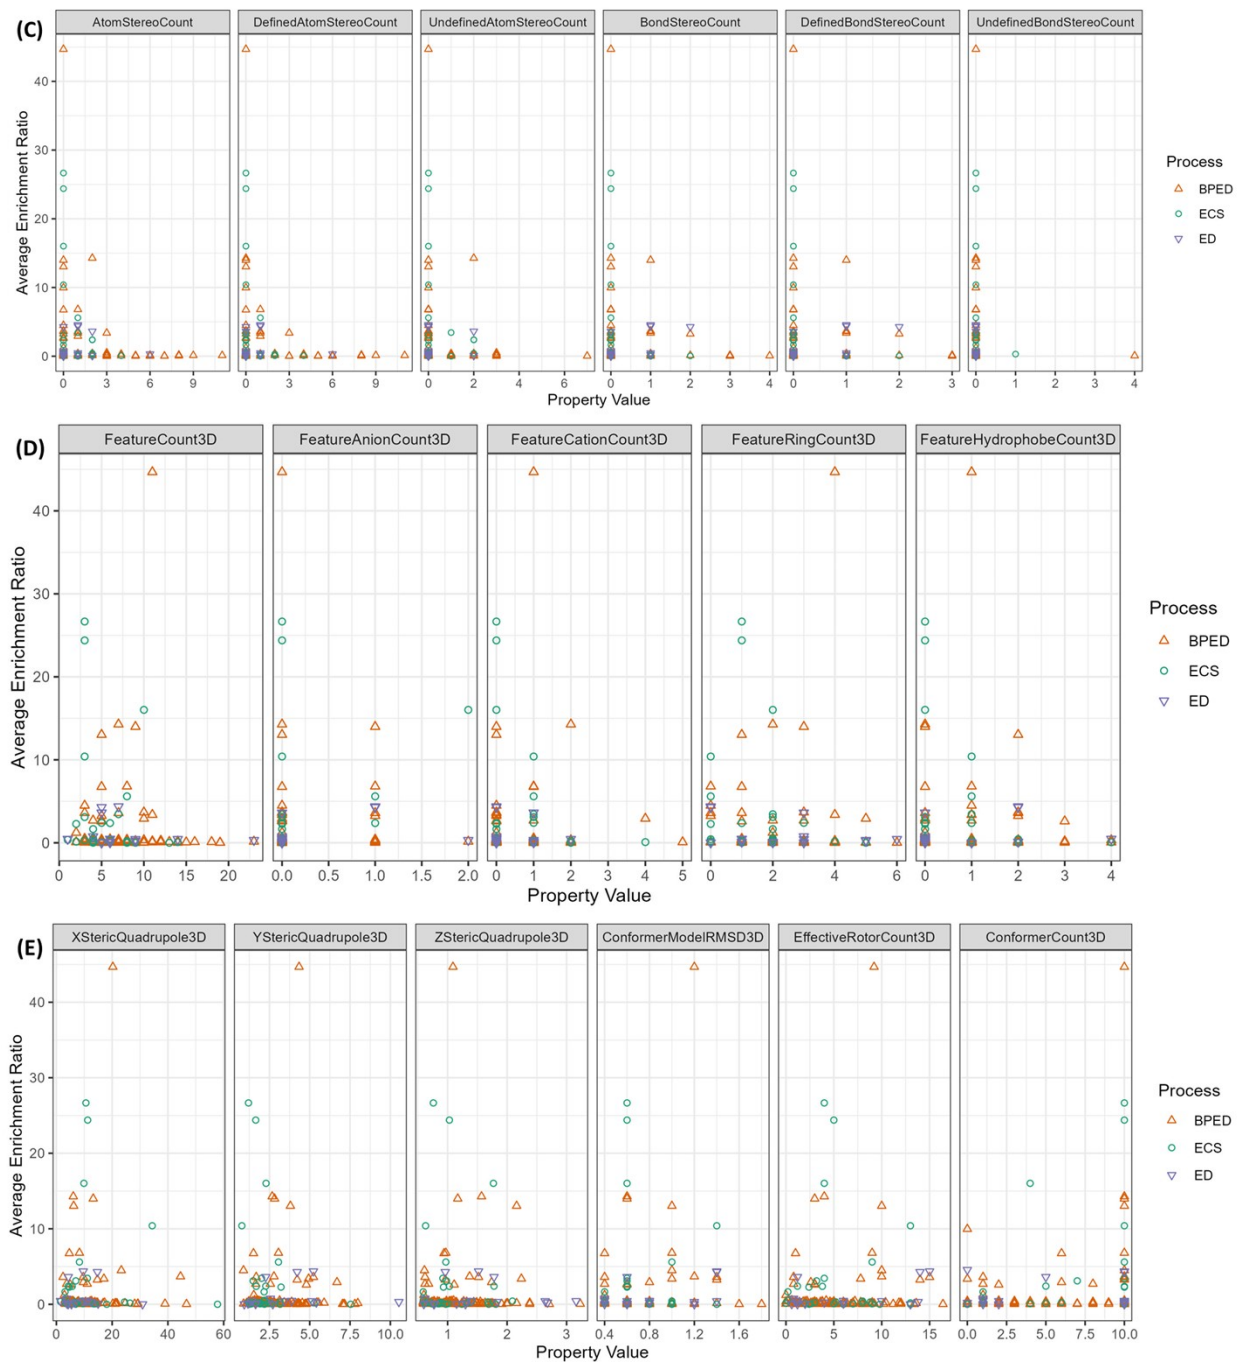

Figure S2-19. Relationships between compound properties and enrichment ratio for priority compounds. Figure 4 shows these relationships for the properties shown in panel A for ECS only. Spearman correlation and linear regression results are summarized in Table S2-12 and Table S2-13. (continued)

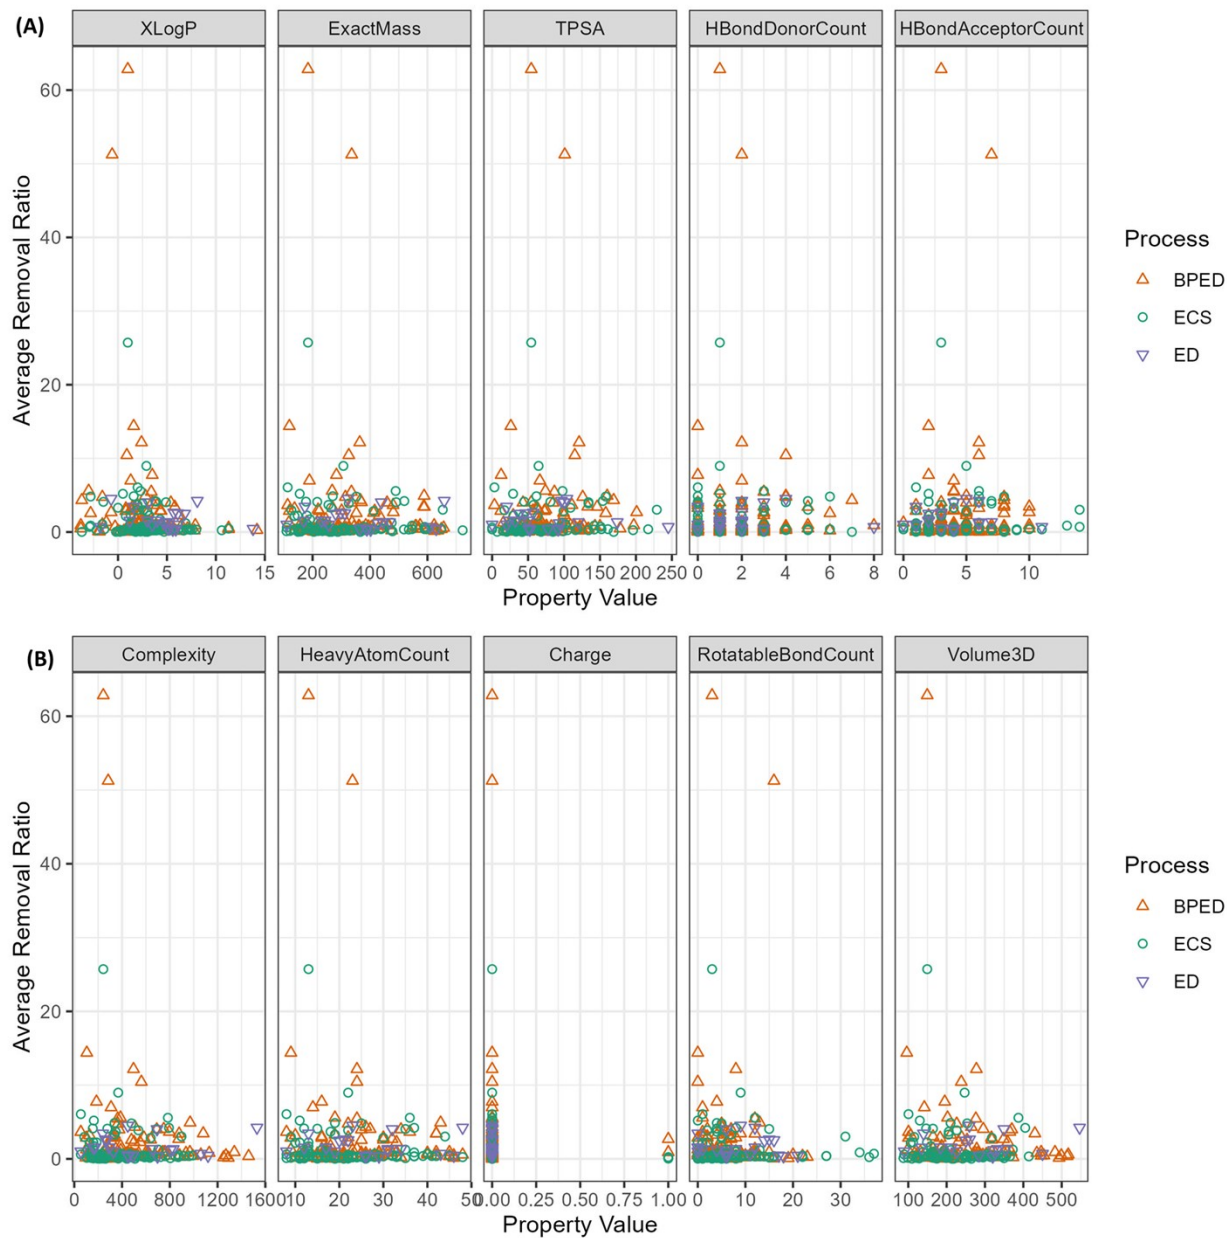

Figure S2-20. Relationships between compound properties and removal ratio for priority compounds. Figure 4 shows these relationships for the properties shown in panel A for ECS only. Spearman correlation and linear regression results are summarized in Table S2-12 and Table S2-13.

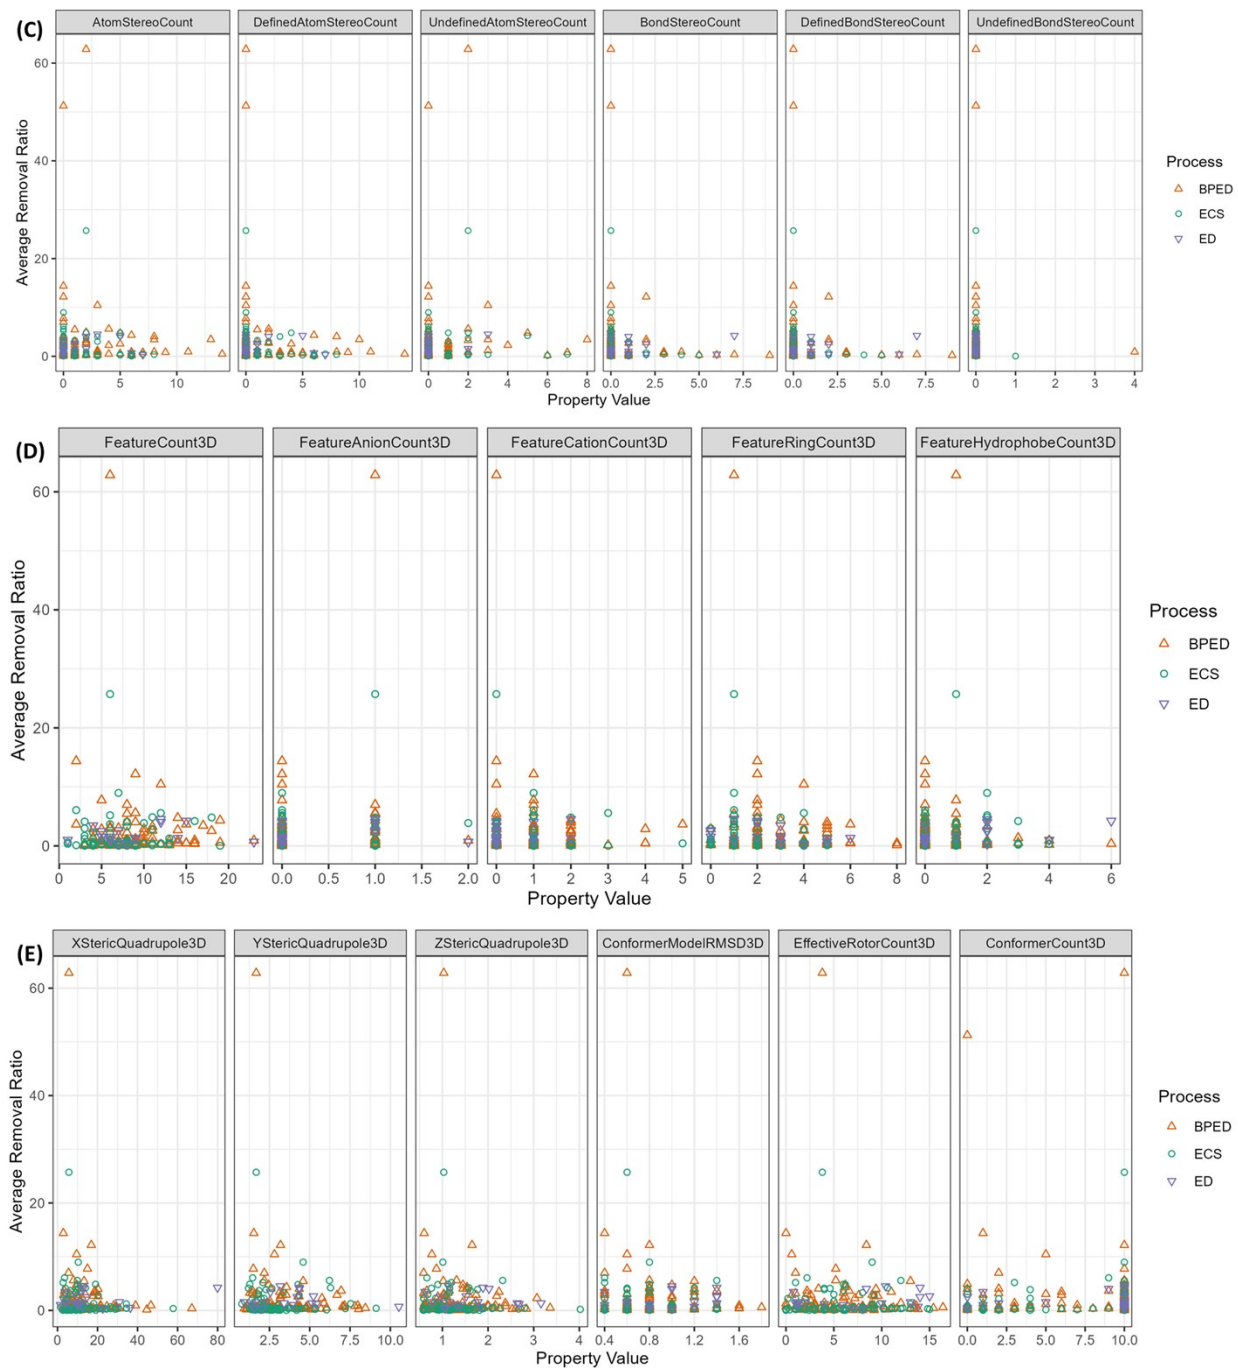

Figure S2-20. Relationships between compound properties and removal ratio for priority compounds. Figure 4 shows these relationships for the properties shown in panel A for ECS only. Spearman correlation and linear regression results are summarized in Table S2-12 and Table S2-13. (continued)

Table S2-12. Spearman correlation results for relationships between compound properties and fates for priority compounds. Boxes have a yellow background if correlations were statistically significant.

|                          | Enrichment Ratio |        |         |        |         |        |
|--------------------------|------------------|--------|---------|--------|---------|--------|
|                          | ECS              |        | ED      |        | BPED    |        |
|                          | p-value          | rho    | p-value | rho    | p-value | rho    |
| XLogP                    | 0.1986           | 0.237  | 0.0477  | 0.486  | 0.4198  | -0.069 |
| ExactMass                | 0.1322           | -0.276 | 0.4248  | 0.207  | 0.0068  | -0.226 |
| TPSA                     | 0.5743           | -0.105 | 0.5698  | -0.148 | 0.5308  | -0.053 |
| Complexity               | 0.1225           | -0.283 | 0.5570  | 0.153  | 0.0031  | -0.246 |
| Charge                   | 0.9132           | -0.020 | -       | -      | 0.6017  | -0.044 |
| HBondDonorCount          | 0.0255           | -0.401 | 0.2231  | -0.312 | 0.5232  | -0.054 |
| HBondAcceptorCount       | 0.2737           | -0.203 | 0.8139  | 0.062  | 0.0694  | -0.153 |
| RotatableBondCount       | 0.0982           | -0.302 | 0.2724  | 0.282  | 0.1398  | -0.125 |
| HeavyAtomCount           | 0.0939           | -0.306 | 0.3833  | 0.226  | 0.0040  | -0.240 |
| AtomStereoCount          | 0.9557           | -0.010 | 0.3159  | 0.259  | 0.1832  | -0.112 |
| DefinedAtomStereoCount   | 0.3784           | -0.164 | 0.1870  | 0.336  | 0.2284  | -0.102 |
| UndefinedAtomStereoCount | 0.3877           | 0.161  | -       | -      | 0.7338  | -0.029 |
| BondStereoCount          | 0.1384           | -0.272 | 0.0189  | 0.562  | 0.9407  | -0.006 |
| DefinedBondStereoCount   | 0.0948           | -0.305 | 0.0189  | 0.562  | 0.9422  | 0.006  |
| UndefinedBondStereoCount | 1.0000           | 0      | -       | -      | 0.6017  | -0.044 |
| Volume3D                 | 0.3212           | -0.191 | 0.5151  | 0.182  | 0.0103  | -0.224 |
| XStericQuadrupole3D      | 0.6021           | -0.101 | 0.7131  | -0.104 | 0.1545  | -0.126 |
| YStericQuadrupole3D      | 0.3787           | -0.170 | 0.1261  | 0.414  | 0.0895  | -0.150 |
| ZStericQuadrupole3D      | 0.8840           | -0.028 | 0.3268  | 0.271  | 0.0267  | -0.194 |
| FeatureCount3D           | 0.0943           | -0.317 | 0.7519  | -0.089 | 0.0467  | -0.175 |
| FeatureAnionCount3D      | 0.0408           | 0.382  | 0.1172  | 0.422  | 0.3590  | 0.081  |
| FeatureCationCount3D     | 0.3231           | -0.190 | 0.4983  | -0.190 | 0.2036  | -0.112 |
| FeatureRingCount3D       | 0.2982           | -0.200 | 0.6095  | -0.144 | 0.0103  | -0.224 |
| FeatureHydrophobeCount3D | 0.0910           | -0.320 | 0.3161  | 0.278  | 0.4921  | 0.061  |
| ConformerModelRMSD3D     | 0.2070           | -0.241 | 0.4342  | 0.218  | 0.1852  | -0.117 |
| EffectiveRotorCount3D    | 0.3689           | -0.173 | 0.4489  | 0.212  | 0.2097  | -0.111 |
| ConformerCount3D         | 0.7585           | 0.058  | 0.6577  | -0.116 | 0.6371  | -0.040 |

Table S2-12. Spearman correlation results for relationships between compound properties and fates for priority compounds. Boxes have a yellow background if correlations were statistically significant. (continued)

|                          | Removal Ratio |        |         |        |         |        |
|--------------------------|---------------|--------|---------|--------|---------|--------|
|                          | ECS           |        | ED      |        | BPED    |        |
|                          | p-value       | rho    | p-value | rho    | p-value | rho    |
| XLogP                    | 0.3990        | -0.084 | 0.3719  | -0.205 | 0.1641  | -0.128 |
| ExactMass                | 0.9943        | 0.001  | 0.4022  | -0.192 | 0.2094  | 0.115  |
| TPSA                     | 0.0990        | 0.163  | 0.9599  | 0.012  | 0.0862  | 0.157  |
| Complexity               | 0.6382        | -0.047 | 0.2424  | -0.266 | 0.1302  | 0.138  |
| Charge                   | 0.0268        | -0.217 | -       | -      | 0.3312  | 0.089  |
| HBondDonorCount          | 0.6256        | 0.048  | 0.5543  | 0.137  | 0.1273  | 0.139  |
| HBondAcceptorCount       | 0.1175        | 0.154  | 0.6956  | -0.091 | 0.1250  | 0.140  |
| RotatableBondCount       | 0.2241        | 0.120  | 0.5586  | -0.135 | 0.4445  | -0.070 |
| HeavyAtomCount           | 0.9101        | -0.011 | 0.4344  | -0.180 | 0.2303  | 0.110  |
| AtomStereoCount          | 0.4728        | -0.071 | 0.2337  | 0.272  | 0.0186  | 0.214  |
| DefinedAtomStereoCount   | 0.5620        | -0.058 | 0.6983  | 0.090  | 0.2510  | 0.105  |
| UndefinedAtomStereoCount | 0.6309        | 0.048  | 0.1429  | 0.331  | 0.0327  | 0.194  |
| BondStereoCount          | 0.3473        | -0.093 | 0.9707  | -0.009 | 0.6891  | -0.037 |
| DefinedBondStereoCount   | 0.6012        | -0.052 | 0.9707  | -0.009 | 0.6140  | -0.046 |
| UndefinedBondStereoCount | 0.1219        | -0.153 | -       | -      | 0.6903  | 0.037  |
| Volume3D                 | 0.5735        | -0.060 | 0.9435  | -0.020 | 0.3848  | 0.084  |
| XStericQuadrupole3D      | 0.9352        | 0.009  | 0.8611  | 0.047  | 0.9583  | 0.005  |
| YStericQuadrupole3D      | 0.6179        | -0.053 | 0.4846  | 0.181  | 0.2991  | 0.100  |
| ZStericQuadrupole3D      | 0.6639        | -0.046 | 0.9330  | -0.022 | 0.4386  | -0.075 |
| FeatureCount3D           | 0.6651        | 0.046  | 0.8474  | 0.050  | 0.0212  | 0.221  |
| FeatureAnionCount3D      | 0.2045        | 0.135  | 0.2069  | 0.322  | 0.0111  | 0.242  |
| FeatureCationCount3D     | 0.5964        | -0.057 | 0.3836  | 0.226  | 0.2029  | 0.123  |
| FeatureRingCount3D       | 0.0775        | -0.187 | 0.0682  | -0.453 | 0.0562  | 0.183  |
| FeatureHydrophobeCount3D | 0.1848        | 0.141  | 0.1104  | 0.401  | 0.1290  | -0.146 |
| ConformerModelRMSD3D     | 0.5909        | 0.057  | 0.3306  | 0.251  | 0.7876  | 0.026  |
| EffectiveRotorCount3D    | 0.2502        | 0.122  | 0.2790  | 0.279  | 0.6043  | -0.050 |
| ConformerCount3D         | 0.1262        | 0.151  | 0.3418  | 0.218  | 0.1634  | -0.128 |

Table S2-13. Slopes, intercepts (Int), and R<sup>2</sup> for relationships between compound properties and fates for priority compounds. Boxes have a yellow background if correlations were statistically significant based on Spearman correlation (Table S2-12).

|                          | Enrichment Ratio |     |                |          |        |                |        |       |                |
|--------------------------|------------------|-----|----------------|----------|--------|----------------|--------|-------|----------------|
|                          | ECS              |     |                | ED       |        |                | BPED   |       |                |
|                          | Slope            | Int | R <sup>2</sup> | Slope    | Int    | R <sup>2</sup> | Slope  | Int   | R <sup>2</sup> |
| XLogP                    | 0.99             | 1.2 | 0.0972         | 0.33     | -0.029 | 0.1882         | 0.13   | 0.83  | 0.0048         |
| ExactMass                | -0.0087          | 5.5 | 0.0213         | -0.00011 | 1.2    | 0.0001         | 0.0029 | 0.33  | 0.0062         |
| TPSA                     | 0.0078           | 2.9 | 0.0021         | -0.0052  | 1.5    | 0.0354         | 0.0079 | 0.64  | 0.0053         |
| Complexity               | -0.0050          | 4.6 | 0.0109         | -0.0010  | 1.6    | 0.0283         | 0.0011 | 0.78  | 0.0030         |
| Charge                   | -3.1             | 3.4 | 0.0067         | -        | -      | -              | -1.1   | 1.2   | 0.0005         |
| HBondDonorCount          | -1.6             | 4.9 | 0.0684         | -0.14    | 1.4    | 0.0192         | -0.011 | 1.2   | 0.0000         |
| HBondAcceptorCount       | -0.24            | 4.1 | 0.0132         | -0.075   | 1.4    | 0.0145         | 0.14   | 0.63  | 0.0050         |
| RotatableBondCount       | -0.080           | 3.8 | 0.0102         | 0.13     | 0.39   | 0.2162         | 0.029  | 1.0   | 0.0009         |
| HeavyAtomCount           | -0.15            | 6.0 | 0.0319         | -0.0037  | 1.3    | 0.0004         | 0.035  | 0.45  | 0.0045         |
| AtomStereoCount          | -1.5             | 4.3 | 0.0479         | 0.059    | 1.2    | 0.0026         | -0.20  | 1.4   | 0.0094         |
| DefinedAtomStereoCount   | -1.4             | 3.8 | 0.0312         | -0.015   | 1.2    | 0.0002         | -0.17  | 1.3   | 0.0062         |
| UndefinedAtomStereoCount | -1.0             | 3.5 | 0.0090         | 0.37     | 1.1    | 0.0203         | -0.25  | 1.3   | 0.0027         |
| BondStereoCount          | -2.6             | 3.7 | 0.0286         | 1.9      | 0.54   | 0.4211         | -0.058 | 1.2   | 0.0001         |
| DefinedBondStereoCount   | -2.3             | 3.6 | 0.0213         | 1.9      | 0.54   | 0.4211         | 0.013  | 1.2   | 0.0000         |
| UndefinedBondStereoCount | -3.1             | 3.4 | 0.0064         | -        | -      | -              | -0.28  | 1.2   | 0.0005         |
| Volume3D                 | -0.011           | 5.5 | 0.0095         | 0.00079  | 0.86   | 0.0025         | 0.0052 | 0.062 | 0.0087         |
| XStericQuadrupole3D      | 0.015            | 3.3 | 0.0006         | -0.0050  | 1.1    | 0.0005         | 0.053  | 0.60  | 0.0080         |
| YStericQuadrupole3D      | -1.2             | 6.3 | 0.0542         | 0.092    | 0.72   | 0.0201         | 0.28   | 0.37  | 0.0091         |
| ZStericQuadrupole3D      | -0.86            | 4.4 | 0.0027         | -0.067   | 1.1    | 0.0011         | 0.35   | 0.76  | 0.0014         |
| FeatureCount3D           | -0.34            | 5.4 | 0.0234         | -0.049   | 1.4    | 0.0252         | 0.063  | 0.71  | 0.0026         |
| FeatureAnionCount3D      | 4.8              | 2.8 | 0.0895         | 1.0      | 0.77   | 0.1482         | 0.087  | 1.1   | 0.0001         |
| FeatureCationCount3D     | -1.6             | 4.5 | 0.0423         | -0.39    | 1.2    | 0.0247         | 0.13   | 1.1   | 0.0006         |
| FeatureRingCount3D       | -0.94            | 4.9 | 0.0273         | -0.30    | 1.7    | 0.1281         | 0.21   | 0.72  | 0.0032         |
| FeatureHydrophobeCount3D | -1.6             | 4.5 | 0.0455         | 0.38     | 0.76   | 0.0839         | 0.23   | 1.0   | 0.0024         |
| ConformerModelRMSD3D     | -1.4             | 4.5 | 0.0028         | 1.8      | -0.48  | 0.1953         | 2.9    | -0.91 | 0.0277         |
| EffectiveRotorCount3D    | -0.010           | 3.6 | 0.0000         | 0.12     | 0.35   | 0.1660         | 0.15   | 0.40  | 0.0148         |
| ConformerCount3D         | 0.31             | 1.0 | 0.0292         | 0.0031   | 1.2    | 0.0001         | 0.089  | 0.56  | 0.0063         |

Table S2-13. Slopes, intercepts (Int), and R<sup>2</sup> for relationships between compound properties and fates for priority compounds. Boxes have a yellow background if correlations were statistically significant based on Spearman correlation (Table S2-12). (continued)

|                          | Removal Ratio |      |                |         |     |                |        |     |                |
|--------------------------|---------------|------|----------------|---------|-----|----------------|--------|-----|----------------|
|                          | ECS           |      |                | ED      |     |                | BPED   |     |                |
|                          | Slope         | Int  | R <sup>2</sup> | Slope   | Int | R <sup>2</sup> | Slope  | Int | R <sup>2</sup> |
| XLogP                    | -0.17         | 1.8  | 0.0223         | -0.097  | 2.2 | 0.0550         | -0.41  | 3.6 | 0.0234         |
| ExactMass                | -0.0020       | 2.0  | 0.0096         | -       | 1.9 | 0.0019         | -      | 4.0 | 0.0070         |
| TPSA                     | 0.0032        | 1.1  | 0.0029         | -0.0013 | 1.9 | 0.0031         | 0.0057 | 2.0 | 0.0009         |
| Complexity               | -             | 1.7  | 0.0045         | 0.00020 | 1.7 | 0.0031         | -      | 3.7 | 0.0105         |
| Charge                   | -1.2          | 1.3  | 0.0048         | -       | -   | -              | -0.68  | 2.5 | 0.0001         |
| HBondDonorCount          | 0.048         | 1.2  | 0.0006         | 0.039   | 1.7 | 0.0026         | -0.027 | 2.5 | 0.0000         |
| HBondAcceptorCount       | 0.011         | 1.3  | 0.0001         | -0.027  | 1.9 | 0.0025         | 0.16   | 1.7 | 0.0023         |
| RotatableBondCount       | -0.023        | 1.5  | 0.0038         | -0.016  | 1.9 | 0.0064         | 0.063  | 2.1 | 0.0016         |
| HeavyAtomCount           | -0.032        | 2.0  | 0.0116         | -0.0024 | 1.8 | 0.0004         | -0.069 | 4.1 | 0.0089         |
| AtomStereoCount          | -0.057        | 1.4  | 0.0019         | 0.093   | 1.6 | 0.0221         | -0.044 | 2.5 | 0.0003         |
| DefinedAtomStereoCount   | -0.16         | 1.5  | 0.0137         | 0.013   | 1.8 | 0.0004         | -0.19  | 2.7 | 0.0041         |
| UndefinedAtomStereoCount | 0.32          | 1.2  | 0.0166         | 0.50    | 1.6 | 0.1023         | 0.49   | 2.2 | 0.0078         |
| BondStereoCount          | -0.31         | 1.4  | 0.0069         | 0.12    | 1.6 | 0.0275         | -0.33  | 2.6 | 0.0038         |
| DefinedBondStereoCount   | -0.29         | 1.4  | 0.0061         | 0.12    | 1.6 | 0.0275         | -0.32  | 2.6 | 0.0034         |
| UndefinedBondStereoCount | -1.3          | 1.3  | 0.0019         | -       | -   | -              | -0.39  | 2.5 | 0.0004         |
| Volume3D                 | -0.0040       | 2.3  | 0.0114         | 0.0020  | 1.4 | 0.0289         | -      | 3.9 | 0.0136         |
| XStericQuadrupole3D      | -0.042        | 1.9  | 0.0161         | 0.019   | 1.6 | 0.0705         | -0.065 | 2.9 | 0.0096         |
| YStericQuadrupole3D      | -0.053        | 1.5  | 0.0007         | 0.011   | 1.9 | 0.0003         | -0.34  | 3.2 | 0.0094         |
| ZStericQuadrupole3D      | -0.47         | 2.0  | 0.0072         | -0.20   | 2.3 | 0.0109         | -0.98  | 3.4 | 0.0080         |
| FeatureCount3D           | 0.036         | 1.1  | 0.0016         | 0.035   | 1.7 | 0.0185         | -0.052 | 2.6 | 0.0011         |
| FeatureAnionCount3D      | 2.0           | 1.0  | 0.0728         | 0.56    | 1.8 | 0.0626         | 2.6    | 1.5 | 0.0341         |
| FeatureCationCount3D     | -0.21         | 1.5  | 0.0037         | 0.46    | 1.7 | 0.0598         | -0.36  | 2.4 | 0.0032         |
| FeatureRingCount3D       | -0.34         | 2.1  | 0.0228         | -0.28   | 2.6 | 0.1465         | -0.28  | 2.8 | 0.0052         |
| FeatureHydrophobeCount3D | 0.15          | 1.3  | 0.0027         | 0.38    | 1.5 | 0.2314         | -0.26  | 2.3 | 0.0018         |
| ConformerModelRMSD3D     | -0.88         | 2.1  | 0.0080         | 0.87    | 1.1 | 0.0512         | -2.2   | 3.9 | 0.0111         |
| EffectiveRotorCount3D    | -0.038        | 1.6  | 0.0021         | 0.068   | 1.4 | 0.0702         | -0.16  | 3.1 | 0.0097         |
| ConformerCount3D         | 0.096         | 0.67 | 0.0194         | 0.067   | 1.3 | 0.0506         | -0.17  | 3.7 | 0.0078         |

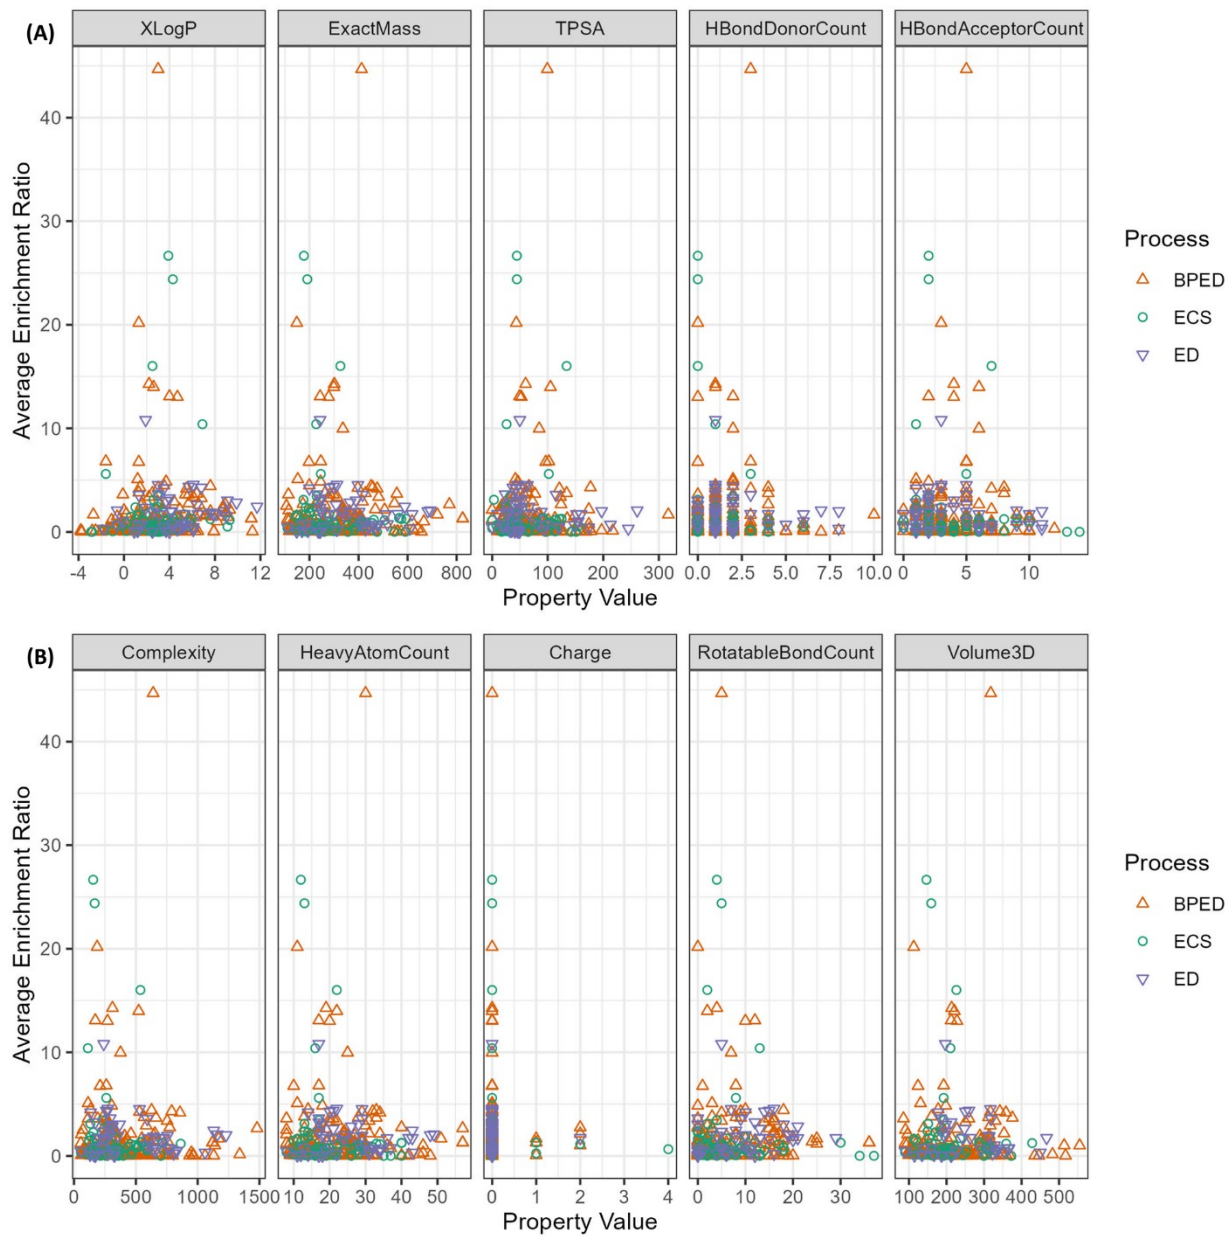

Figure S2-21. Relationships between compound properties and enrichment ratio for all identified compounds. Spearman correlation and linear regression results are summarized in Table S2-14 and Table S2-15.

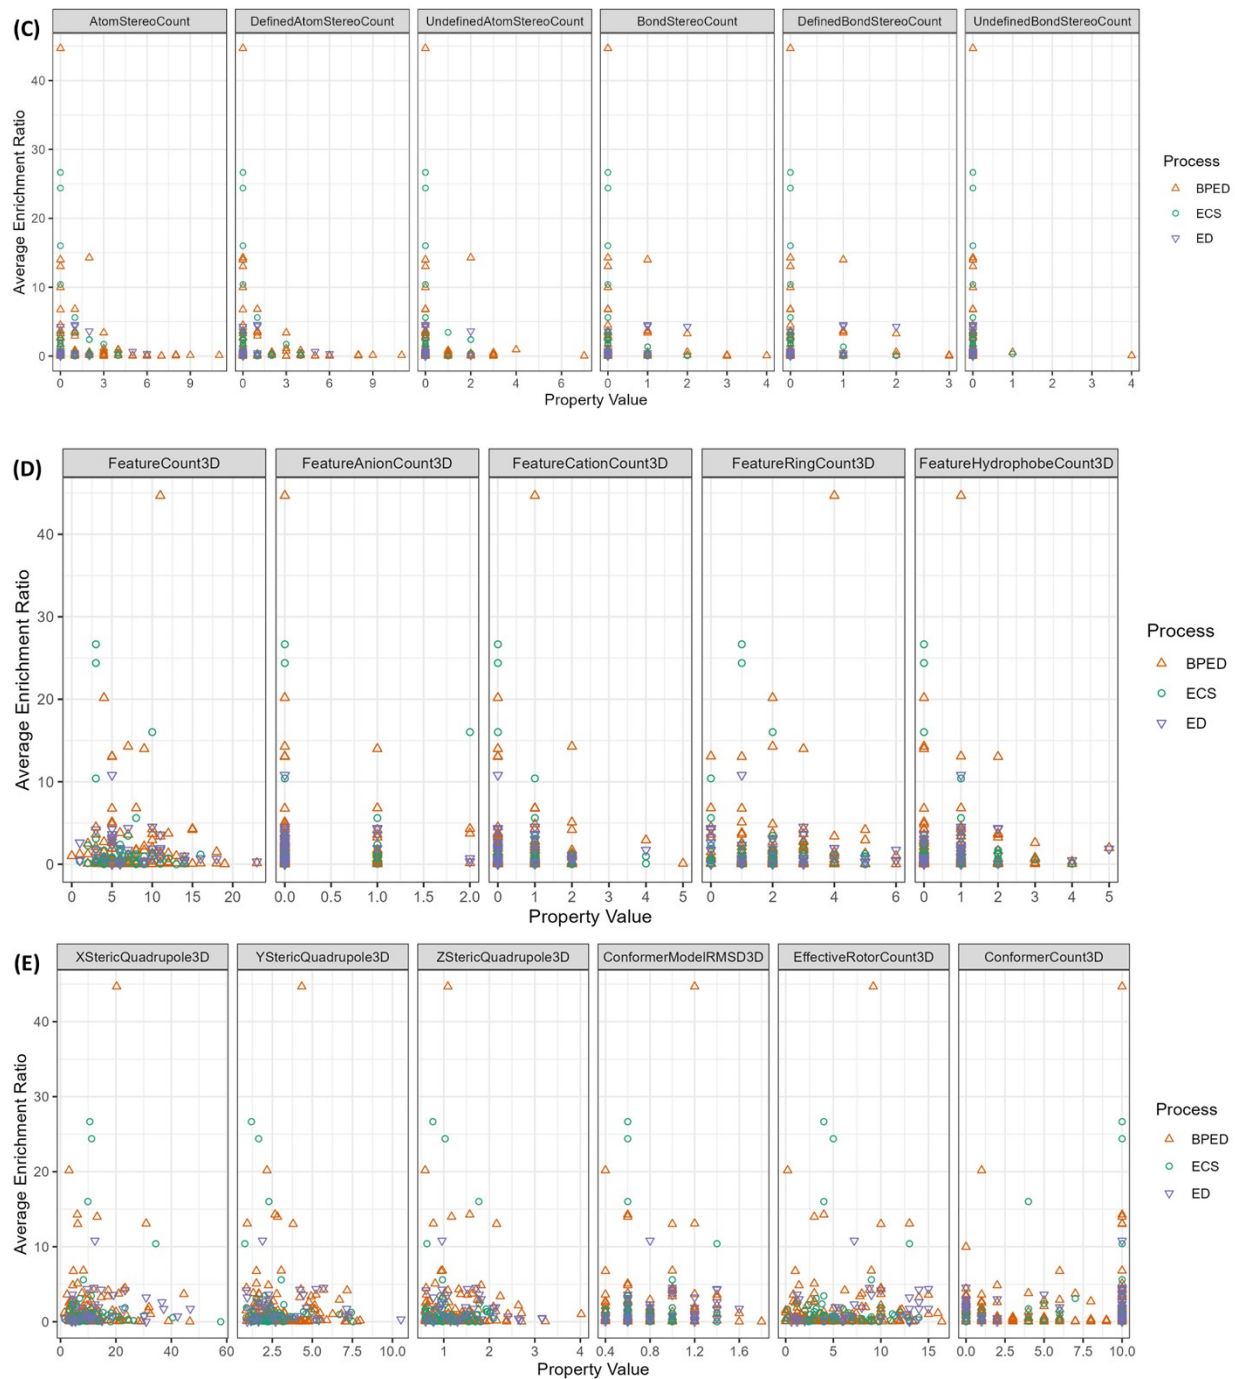

Figure S2-21. Relationships between compound properties and enrichment ratio for all identified compounds. Spearman correlation and linear regression results are summarized in Table S2-14 and Table S2-15. (continued)

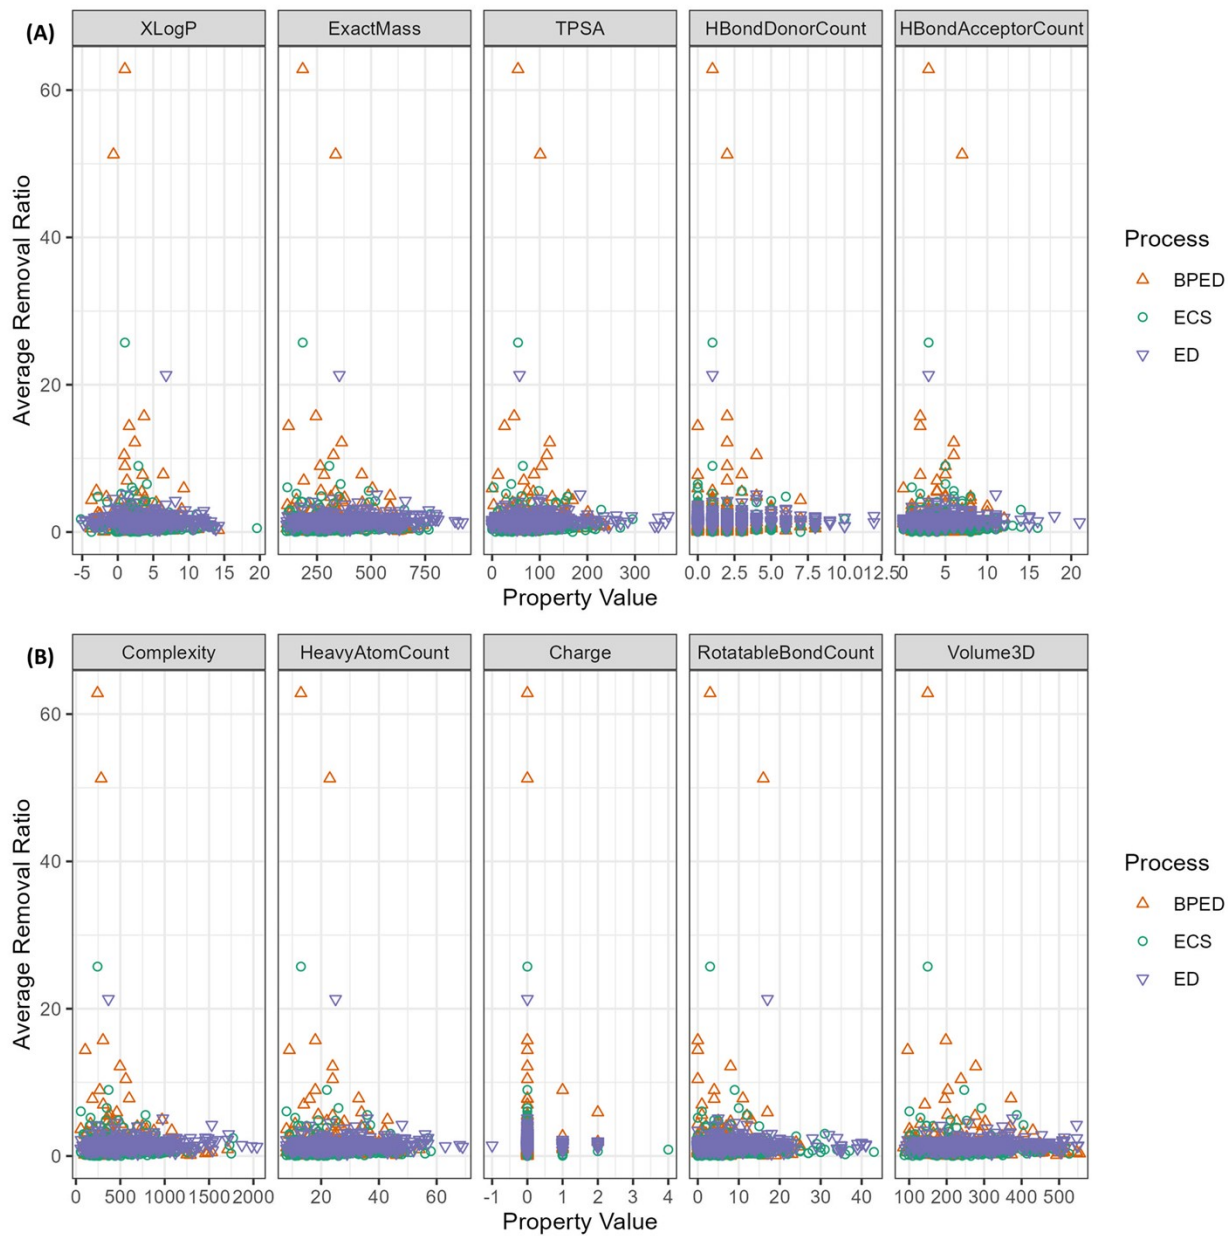

Figure S2-22. Relationships between compound properties and removal ratio for all identified compounds. Spearman correlation and linear regression results are summarized in Table S2-14 and Table S2-15.

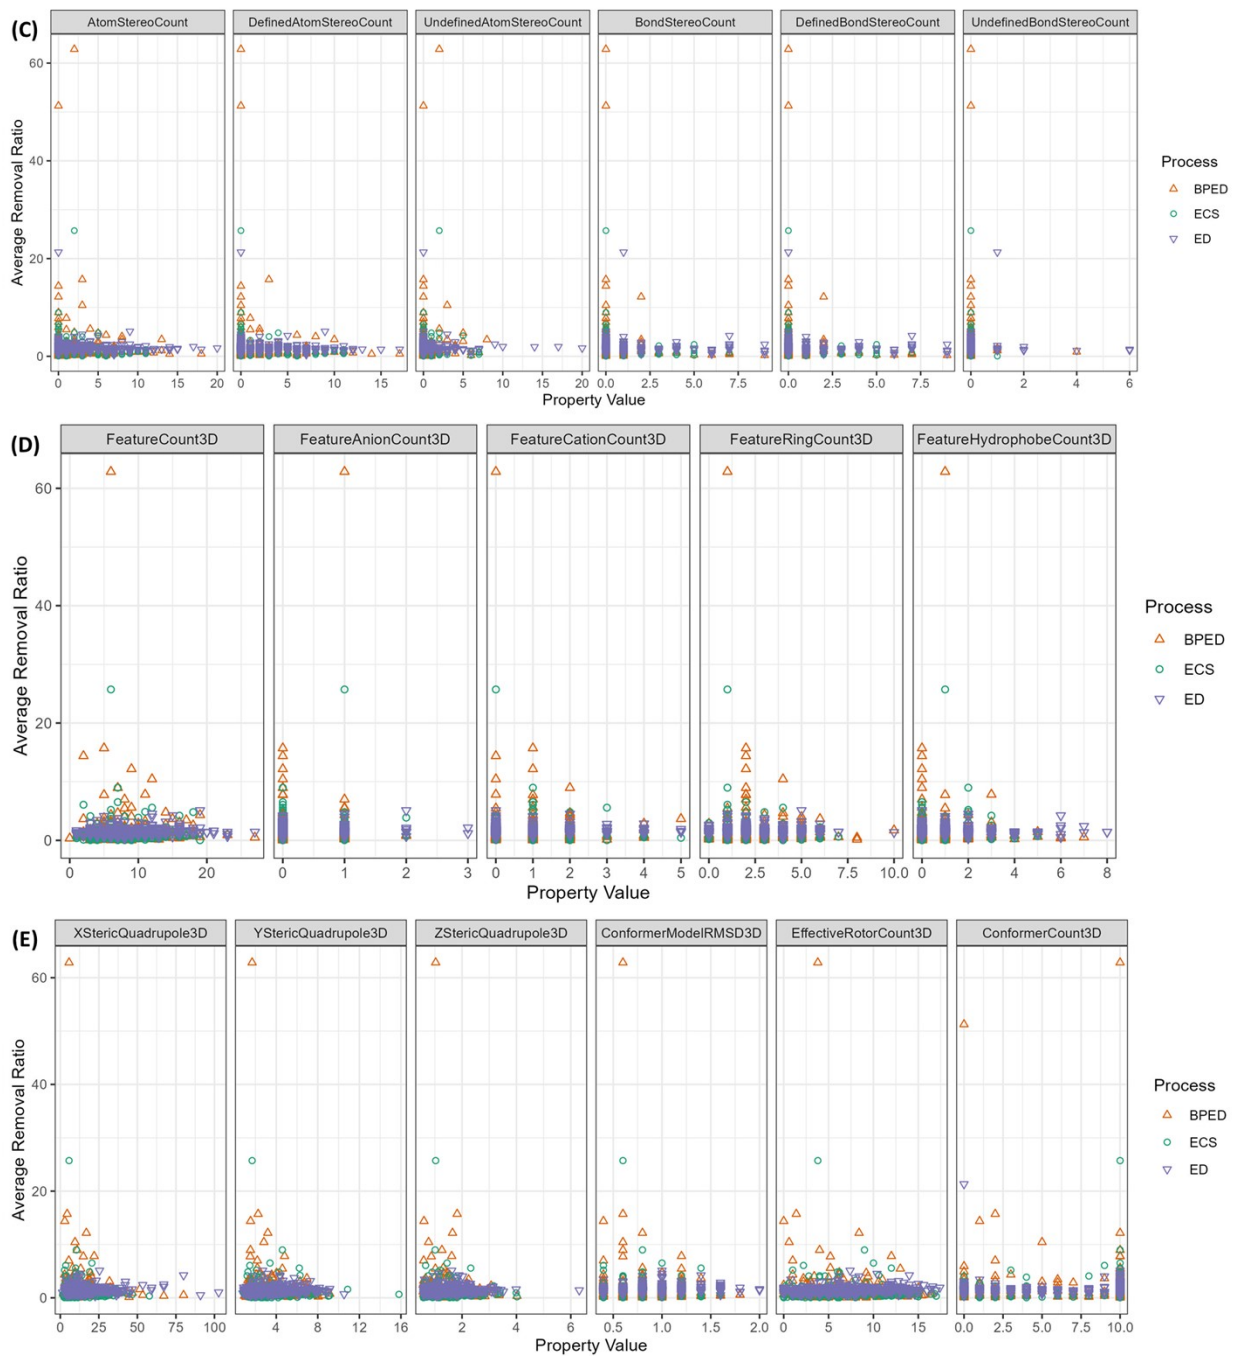

Figure S2-22. Relationships between compound properties and removal ratio for all identified compounds. Spearman correlation and linear regression results are summarized in Table S2-14 and Table S2-15. (continued)

Table S2-14. Spearman correlation results for relationships between compound properties and fates for all identified compounds. Boxes have a yellow background if correlations were statistically significant.

| Enrichment Ratio         |         |        |         |        |         |        |
|--------------------------|---------|--------|---------|--------|---------|--------|
|                          | ECS     |        | ED      |        | BPED    |        |
|                          | p-value | rho    | p-value | rho    | p-value | rho    |
| XLogP                    | 0.0592  | 0.232  | 0.1609  | 0.208  | 0.0101  | 0.175  |
| ExactMass                | 0.6864  | -0.050 | 0.8570  | 0.027  | 0.6292  | 0.033  |
| TPSA                     | 0.8622  | 0.022  | 0.7031  | -0.057 | 0.6741  | -0.029 |
| Complexity               | 0.9060  | -0.015 | 0.8398  | -0.030 | 0.2920  | -0.072 |
| Charge                   | 0.7724  | 0.036  | 0.9422  | 0.011  | 0.0737  | 0.122  |
| HBondDonorCount          | 0.3098  | -0.126 | 0.3481  | -0.140 | 0.3894  | -0.059 |
| HBondAcceptorCount       | 0.6668  | -0.054 | 0.7478  | -0.048 | 0.1965  | -0.088 |
| RotatableBondCount       | 0.1082  | -0.198 | 0.0318  | 0.314  | 0.0607  | 0.128  |
| HeavyAtomCount           | 0.5025  | -0.083 | 0.9019  | 0.018  | 0.8994  | 0.009  |
| AtomStereoCount          | 0.5739  | -0.070 | 0.5243  | 0.095  | 0.0429  | -0.138 |
| DefinedAtomStereoCount   | 0.1423  | -0.181 | 0.7782  | 0.042  | 0.6421  | -0.032 |
| UndefinedAtomStereoCount | 0.2079  | 0.156  | 0.5790  | 0.083  | 0.0161  | -0.163 |
| BondStereoCount          | 0.4510  | -0.094 | 0.0908  | 0.249  | 0.1336  | 0.102  |
| DefinedBondStereoCount   | 0.5968  | -0.066 | 0.0908  | 0.249  | 0.1659  | 0.094  |
| UndefinedBondStereoCount | 0.4733  | -0.089 | -       | -      | 0.5395  | 0.042  |
| Volume3D                 | 0.5690  | -0.074 | 0.9935  | 0.001  | 0.2686  | -0.082 |
| XStericQuadrupole3D      | 0.9606  | -0.006 | 0.1793  | 0.229  | 0.3539  | -0.069 |
| YStericQuadrupole3D      | 0.7105  | -0.048 | 0.8903  | 0.024  | 0.4192  | -0.060 |
| ZStericQuadrupole3D      | 0.9855  | 0.002  | 0.5410  | -0.105 | 0.4940  | -0.051 |
| FeatureCount3D           | 0.5263  | -0.083 | 0.2425  | -0.200 | 0.1506  | -0.107 |
| FeatureAnionCount3D      | 0.0786  | 0.227  | 0.2664  | 0.190  | 0.1520  | 0.106  |
| FeatureCationCount3D     | 0.3989  | -0.110 | 0.6167  | -0.086 | 0.3990  | -0.063 |
| FeatureRingCount3D       | 0.6941  | 0.051  | 0.0792  | -0.296 | 0.0378  | -0.154 |
| FeatureHydrophobeCount3D | 0.3542  | -0.121 | 0.0273  | 0.368  | 0.5302  | 0.047  |
| ConformerModelRMSD3D     | 0.2024  | -0.166 | 0.0693  | 0.306  | 0.6466  | 0.034  |
| EffectiveRotorCount3D    | 0.2333  | -0.155 | 0.0296  | 0.363  | 0.9381  | -0.006 |
| ConformerCount3D         | 0.8963  | 0.016  | 0.6920  | -0.059 | 0.0101  | -0.174 |

Table S2-14. Spearman correlation results for relationships between compound properties and fates for all identified compounds. Boxes have a yellow background if correlations were statistically significant. (continued)

|                          | Removal Ratio |        |         |        |         |        |
|--------------------------|---------------|--------|---------|--------|---------|--------|
|                          | ECS           |        | ED      |        | BPED    |        |
|                          | p-value       | rho    | p-value | rho    | p-value | rho    |
| XLogP                    | 0.1786        | -0.076 | 0.0672  | -0.079 | 0.2379  | -0.072 |
| ExactMass                | 0.0893        | 0.096  | 0.0007  | 0.144  | 0.4265  | 0.048  |
| TPSA                     | 0.0002        | 0.211  | 0.0031  | 0.127  | 0.2221  | 0.074  |
| Complexity               | 0.2182        | 0.070  | 0.0039  | 0.124  | 0.6793  | 0.025  |
| Charge                   | 0.4905        | -0.039 | 0.1581  | 0.061  | 0.0050  | 0.170  |
| HBondDonorCount          | 0.0177        | 0.134  | 0.0008  | 0.144  | 0.1296  | 0.092  |
| HBondAcceptorCount       | 0.0011        | 0.183  | 0.0036  | 0.125  | 0.5917  | 0.033  |
| RotatableBondCount       | 0.2613        | 0.064  | 0.0017  | 0.135  | 0.6849  | 0.025  |
| HeavyAtomCount           | 0.1797        | 0.076  | 0.0003  | 0.155  | 0.4693  | 0.044  |
| AtomStereoCount          | 0.5660        | -0.033 | 0.0007  | 0.145  | 0.5406  | 0.037  |
| DefinedAtomStereoCount   | 0.7828        | -0.016 | 0.0469  | 0.085  | 0.9424  | -0.004 |
| UndefinedAtomStereoCount | 0.6820        | -0.023 | 0.0146  | 0.105  | 0.2950  | 0.064  |
| BondStereoCount          | 0.7841        | -0.016 | 0.7039  | 0.016  | 0.4024  | -0.051 |
| DefinedBondStereoCount   | 0.9809        | -0.001 | 0.9469  | 0.003  | 0.2114  | -0.076 |
| UndefinedBondStereoCount | 0.0947        | -0.095 | 0.4319  | 0.034  | 0.2305  | 0.073  |
| Volume3D                 | 0.2491        | 0.072  | 0.0003  | 0.170  | 0.7699  | 0.019  |
| XStericQuadrupole3D      | 0.4131        | 0.051  | 0.0691  | 0.086  | 0.6960  | -0.025 |
| YStericQuadrupole3D      | 0.6151        | 0.032  | 0.0001  | 0.178  | 0.6435  | 0.030  |
| ZStericQuadrupole3D      | 0.3378        | 0.060  | 0.1127  | 0.075  | 0.9425  | 0.005  |
| FeatureCount3D           | 0.0197        | 0.146  | 0.0069  | 0.127  | 0.0645  | 0.119  |
| FeatureAnionCount3D      | 0.2549        | 0.071  | 0.7479  | -0.015 | 0.0243  | 0.145  |
| FeatureCationCount3D     | 0.5988        | 0.033  | 0.0004  | 0.165  | 0.0421  | 0.131  |
| FeatureRingCount3D       | 0.7172        | -0.023 | 0.9809  | 0.001  | 0.3920  | 0.055  |
| FeatureHydrophobeCount3D | 0.4883        | 0.044  | 0.8150  | -0.011 | 0.2267  | -0.078 |
| ConformerModelRMSD3D     | 0.3659        | 0.057  | 0.00001 | 0.208  | 0.9436  | 0.005  |
| EffectiveRotorCount3D    | 0.2404        | 0.074  | 0.00002 | 0.202  | 0.7756  | -0.018 |
| ConformerCount3D         | 0.0538        | 0.109  | 0.3426  | 0.041  | 0.1942  | -0.079 |

Table S2-15. Slopes, intercepts (Int), and R<sup>2</sup> for relationships between compound properties and fates for all identified compounds. Boxes have a yellow background if correlations were statistically significant based on Spearman correlation (Table S2-14).

|                          | Enrichment Ratio |     |                |         |      |                |        |       |                |
|--------------------------|------------------|-----|----------------|---------|------|----------------|--------|-------|----------------|
|                          | ECS              |     |                | ED      |      |                | BPED   |       |                |
|                          | Slope            | Int | R <sup>2</sup> | Slope   | Int  | R <sup>2</sup> | Slope  | Int   | R <sup>2</sup> |
| XLogP                    | 0.26             | 1.2 | 0.0167         | 0.057   | 1.7  | 0.0078         | 0.10   | 1.2   | 0.0053         |
| ExactMass                | -0.0058          | 3.7 | 0.0234         | -0.0011 | 2.3  | 0.0073         | 0.0014 | 1.1   | 0.0023         |
| TPSA                     | 0.00042          | 2.0 | 1.23E-05       | -0.0053 | 2.3  | 0.0309         | 0.0037 | 1.2   | 0.0018         |
| Complexity               | -0.0034          | 3.1 | 0.0157         | -0.0010 | 2.4  | 0.0279         | 0.0005 | 1.3   | 0.0011         |
| Charge                   | -0.45            | 2.0 | 0.0028         | -0.10   | 1.9  | 0.0002         | 0.091  | 1.5   | 3.94E-05       |
| HBondDonorCount          | -0.75            | 2.9 | 0.0390         | -0.13   | 2.2  | 0.0194         | -0.026 | 1.5   | 0.0001         |
| HBondAcceptorCount       | -0.16            | 2.6 | 0.0092         | -0.09   | 2.3  | 0.0236         | 0.059  | 1.3   | 0.0011         |
| RotatableBondCount       | -0.060           | 2.4 | 0.0084         | 0.045   | 1.5  | 0.0268         | 0.019  | 1.4   | 0.0009         |
| HeavyAtomCount           | -0.10            | 4.1 | 0.0306         | -0.018  | 2.4  | 0.0090         | 0.017  | 1.1   | 0.0016         |
| AtomStereoCount          | -0.45            | 2.4 | 0.0192         | -0.016  | 1.9  | 0.0007         | -0.21  | 1.7   | 0.0116         |
| DefinedAtomStereoCount   | -0.38            | 2.2 | 0.0138         | -0.074  | 2.0  | 0.0061         | -0.17  | 1.6   | 0.0065         |
| UndefinedAtomStereoCount | -0.50            | 2.1 | 0.0032         | 0.017   | 1.9  | 0.0006         | -0.32  | 1.6   | 0.0051         |
| BondStereoCount          | -1.4             | 2.2 | 0.0135         | 0.54    | 1.8  | 0.0236         | 0.037  | 1.5   | 4.89E-05       |
| DefinedBondStereoCount   | -1.3             | 2.2 | 0.0114         | 0.54    | 1.8  | 0.0236         | 0.10   | 1.4   | 0.0003         |
| UndefinedBondStereoCount | -1.7             | 2.0 | 0.0019         | -       | -    | -              | -0.34  | 1.5   | 0.0007         |
| Volume3D                 | -0.010           | 4.3 | 0.0209         | -0.0022 | 2.4  | 0.0087         | 0.0026 | 0.89  | 0.0030         |
| XStericQuadrupole3D      | 0.0018           | 2.1 | 1.31E-05       | 0.0090  | 1.7  | 0.0026         | 0.049  | 0.92  | 0.0084         |
| YStericQuadrupole3D      | -0.61            | 3.7 | 0.0361         | -0.092  | 2.1  | 0.0095         | 0.14   | 1.0   | 0.0030         |
| ZStericQuadrupole3D      | -1.1             | 3.4 | 0.0092         | -0.68   | 2.8  | 0.0521         | 0.012  | 1.4   | 2.32E-06       |
| FeatureCount3D           | -0.24            | 3.7 | 0.0246         | -0.11   | 2.7  | 0.0598         | 0.033  | 1.2   | 0.0008         |
| FeatureAnionCount3D      | 2.6              | 1.7 | 0.0422         | 0.15    | 1.8  | 0.0015         | 0.15   | 1.4   | 0.0003         |
| FeatureCationCount3D     | -0.99            | 2.8 | 0.0311         | -0.32   | 2.0  | 0.0187         | -0.025 | 1.5   | 2.31E-05       |
| FeatureRingCount3D       | -0.49            | 3.0 | 0.0170         | -0.35   | 2.7  | 0.1026         | 0.083  | 1.3   | 0.0007         |
| FeatureHydrophobeCount3D | -0.94            | 2.8 | 0.0287         | 0.30    | 1.6  | 0.0260         | 0.10   | 1.4   | 0.0006         |
| ConformerModelRMSD3D     | -1.5             | 3.3 | 0.0060         | 1.1     | 0.84 | 0.0305         | 1.9    | 0.012 | 0.0167         |
| EffectiveRotorCount3D    | -0.078           | 2.6 | 0.0034         | 0.094   | 1.1  | 0.0491         | 0.10   | 0.93  | 0.0084         |
| ConformerCount3D         | 0.10             | 1.2 | 0.0062         | 0.032   | 1.7  | 0.0060         | 0.019  | 1.4   | 0.0004         |

Table S2-15. Slopes, intercepts (Int), and R<sup>2</sup> for relationships between compound properties and fates for all identified compounds. Boxes have a yellow background if correlations were statistically significant based on Spearman correlation (Table S2-14). (continued)

|                          | Removal Ratio |      |                |         |     |                |         |     |                |
|--------------------------|---------------|------|----------------|---------|-----|----------------|---------|-----|----------------|
|                          | ECS           |      |                | ED      |     |                | BPED    |     |                |
|                          | Slope         | Int  | R <sup>2</sup> | Slope   | Int | R <sup>2</sup> | Slope   | Int | R <sup>2</sup> |
| XLogP                    | -0.057        | 1.3  | 0.0091         | -0.0039 | 1.5 | 0.0002         | -0.20   | 2.5 | 0.0114         |
| ExactMass                | -0.0010       | 1.5  | 0.0076         | 0.00037 | 1.4 | 0.0031         | -0.0032 | 3.0 | 0.0071         |
| TPSA                     | 0.00077       | 1.0  | 0.0005         | 0.00082 | 1.4 | 0.0020         | 0.0010  | 1.8 | 7.22E-05       |
| Complexity               | -0.00038      | 1.3  | 0.0038         | 0.00017 | 1.4 | 0.0031         | -0.0017 | 2.7 | 0.0095         |
| Charge                   | -0.15         | 1.1  | 0.0007         | 0.029   | 1.5 | 0.0001         | 1.1     | 1.8 | 0.0022         |
| HBondDonorCount          | -0.00083      | 1.1  | 7.23E-07       | 0.024   | 1.5 | 0.0021         | -0.0052 | 1.9 | 2.98E-06       |
| HBondAcceptorCount       | 0.0029        | 1.1  | 2.14E-05       | 0.016   | 1.4 | 0.0020         | 0.0018  | 1.8 | 6.79E-07       |
| RotatableBondCount       | -0.012        | 1.2  | 0.0025         | 0.0079  | 1.4 | 0.0038         | -0.0014 | 1.9 | 2.16E-06       |
| HeavyAtomCount           | -0.016        | 1.5  | 0.0086         | 0.0057  | 1.3 | 0.0038         | -0.048  | 3.0 | 0.0083         |
| AtomStereoCount          | -0.035        | 1.2  | 0.0033         | 0.0084  | 1.5 | 0.0007         | -0.054  | 2.0 | 0.0009         |
| DefinedAtomStereoCount   | -0.053        | 1.2  | 0.0076         | 0.0033  | 1.5 | 0.0001         | -0.11   | 2.0 | 0.0038         |
| UndefinedAtomStereoCount | 0.14          | 1.0  | 0.0067         | 0.021   | 1.5 | 0.0013         | 0.34    | 1.7 | 0.0055         |
| BondStereoCount          | -0.072        | 1.1  | 0.0016         | 0.031   | 1.5 | 0.0019         | -0.22   | 1.9 | 0.0029         |
| DefinedBondStereoCount   | -0.068        | 1.1  | 0.0015         | 0.018   | 1.5 | 0.0006         | -0.21   | 1.9 | 0.0026         |
| UndefinedBondStereoCount | -1.0          | 1.1  | 0.0011         | 0.15    | 1.5 | 0.0044         | -0.28   | 1.9 | 0.0002         |
| Volume3D                 | -0.0022       | 1.7  | 0.0112         | 0.00091 | 1.2 | 0.0230         | -0.0049 | 3.0 | 0.0126         |
| XStericQuadrupole3D      | -0.022        | 1.4  | 0.0110         | 0.0048  | 1.4 | 0.0096         | -0.040  | 2.3 | 0.0089         |
| YStericQuadrupole3D      | -0.038        | 1.2  | 0.0014         | 0.041   | 1.3 | 0.0159         | -0.22   | 2.4 | 0.0074         |
| ZStericQuadrupole3D      | -0.18         | 1.4  | 0.0038         | 0.044   | 1.4 | 0.0025         | -0.51   | 2.4 | 0.0044         |
| FeatureCount3D           | -0.0034       | 1.1  | 0.0000         | 0.017   | 1.3 | 0.0160         | -0.046  | 2.1 | 0.0018         |
| FeatureAnionCount3D      | 0.49          | 1.0  | 0.0134         | 0.083   | 1.5 | 0.0044         | 1.2     | 1.4 | 0.0130         |
| FeatureCationCount3D     | -0.035        | 1.1  | 0.0004         | 0.068   | 1.4 | 0.0139         | -0.12   | 1.8 | 0.0007         |
| FeatureRingCount3D       | -0.12         | 1.4  | 0.0117         | -0.0015 | 1.5 | 1.74E-05       | -0.18   | 2.2 | 0.0046         |
| FeatureHydrophobeCount3D | 0.024         | 1.1  | 0.0002         | 0.012   | 1.5 | 0.0008         | -0.14   | 1.8 | 0.0013         |
| ConformerModelRMSD3D     | -0.54         | 1.6  | 0.0072         | 0.32    | 1.2 | 0.0301         | -1.6    | 3.0 | 0.0101         |
| EffectiveRotorCount3D    | -0.029        | 1.3  | 0.0037         | 0.025   | 1.3 | 0.0305         | -0.11   | 2.4 | 0.0097         |
| ConformerCount3D         | 0.033         | 0.86 | 0.0065         | -0.0063 | 1.6 | 0.0007         | -0.089  | 2.5 | 0.0046         |

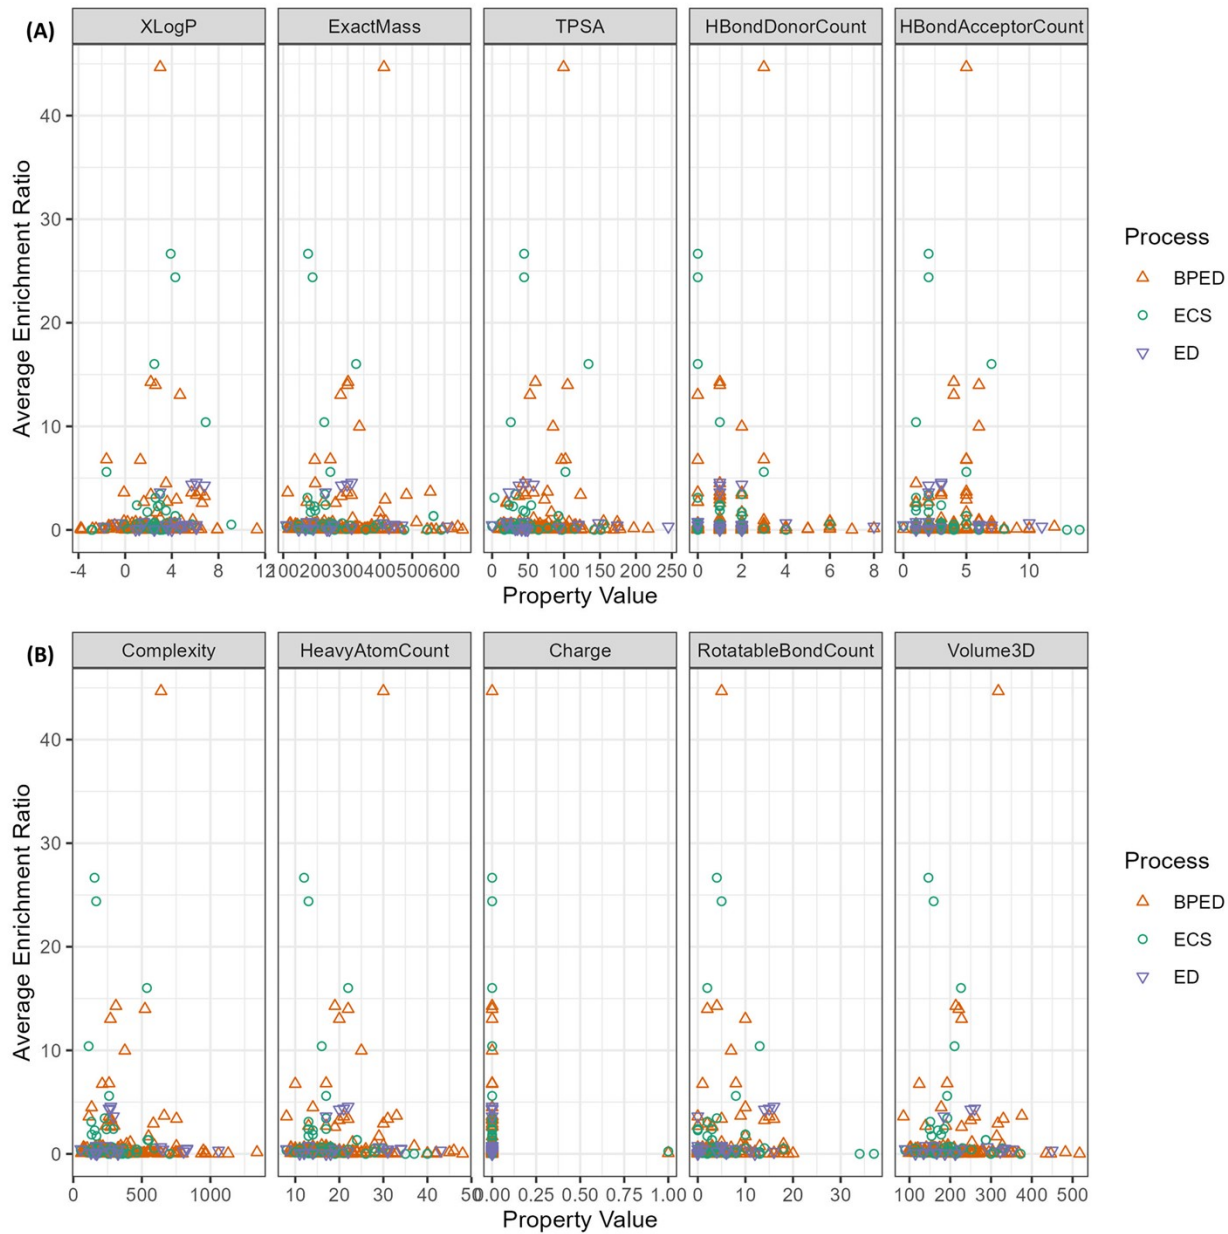

Figure S2-23. Relationships between compound properties and enrichment ratio for identified compounds that showed significant ( $p < 0.05$ ) changes in feature intensity from influent to effluent or product. Spearman correlation and linear regression results are summarized in Table S2-16 and Table S2-17.

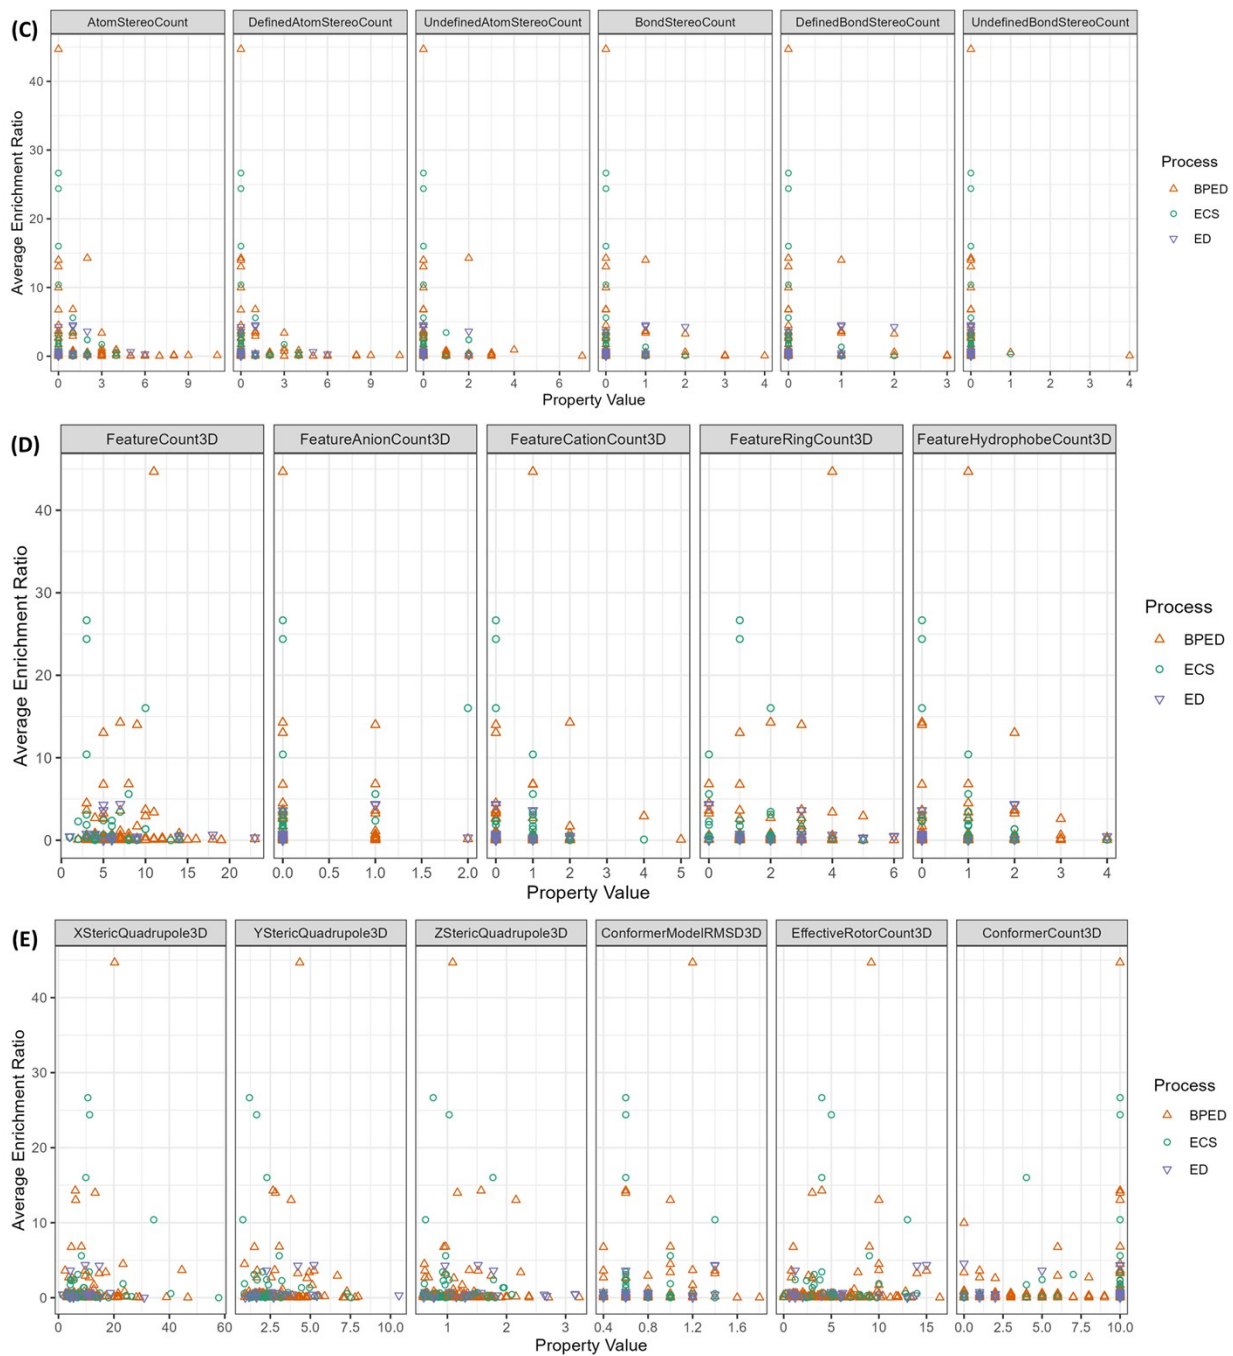

Figure S2-23. Relationships between compound properties and enrichment ratio for identified compounds that showed significant ( $p < 0.05$ ) changes in feature intensity from influent to effluent or product. Spearman correlation and linear regression results are summarized in Table S2-16 and Table S2-17. (continued)

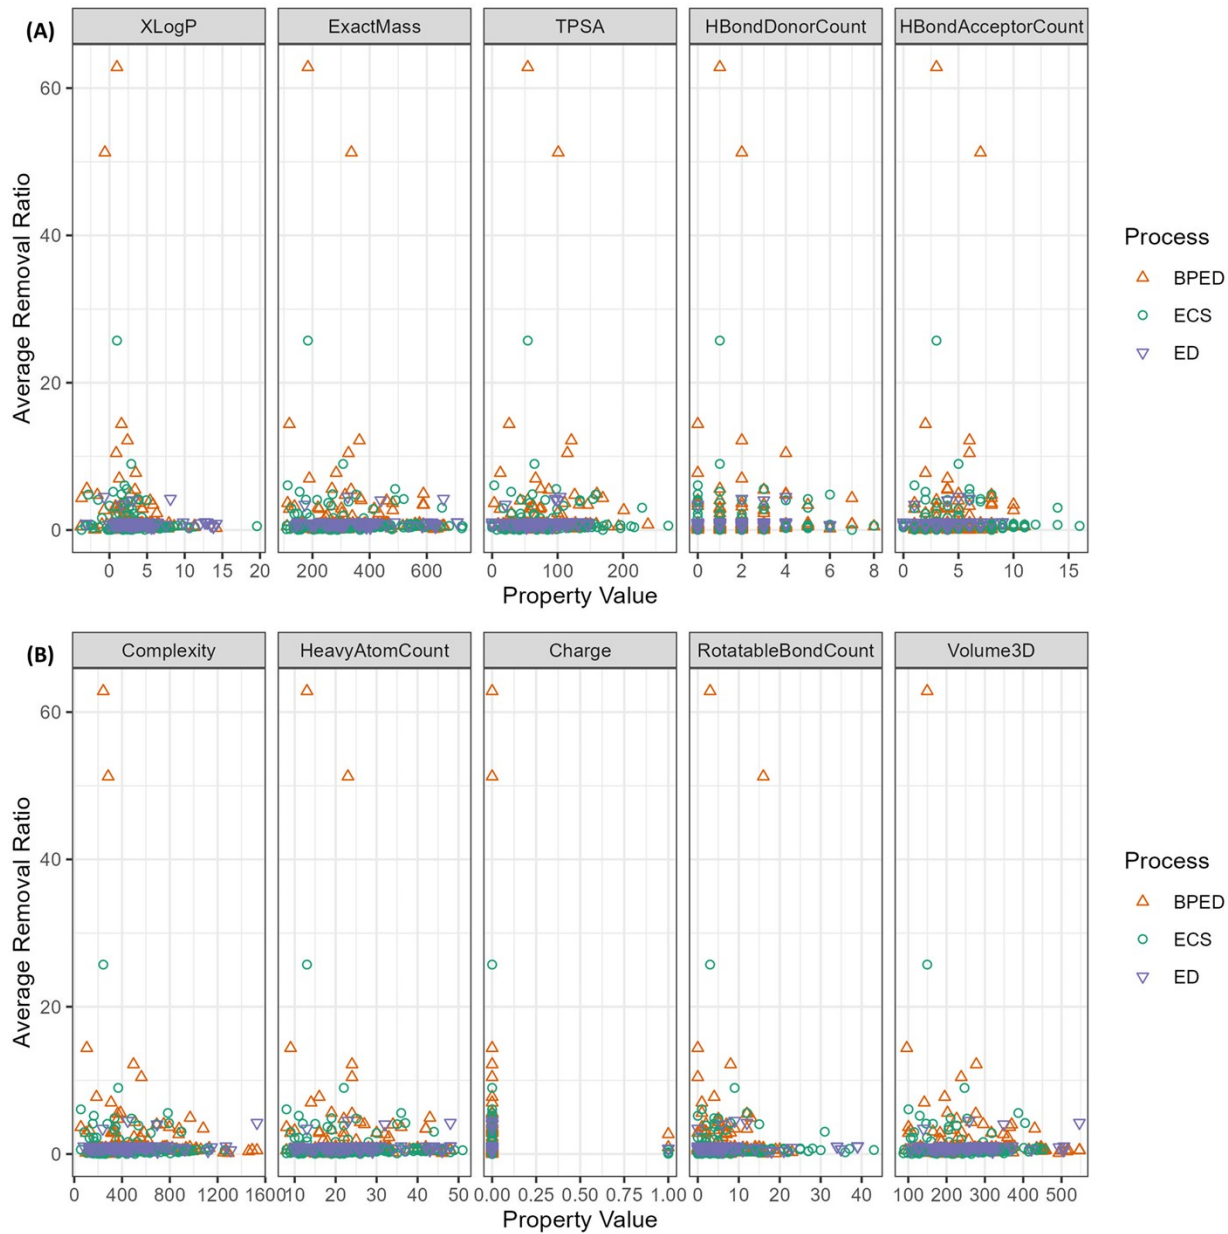

Figure S2-24. Relationships between compound properties and removal ratio for identified compounds that showed significant ( $p < 0.05$ ) changes in feature intensity from influent to effluent or product. Spearman correlation and linear regression results are summarized in Table S2-16 and Table S2-17.

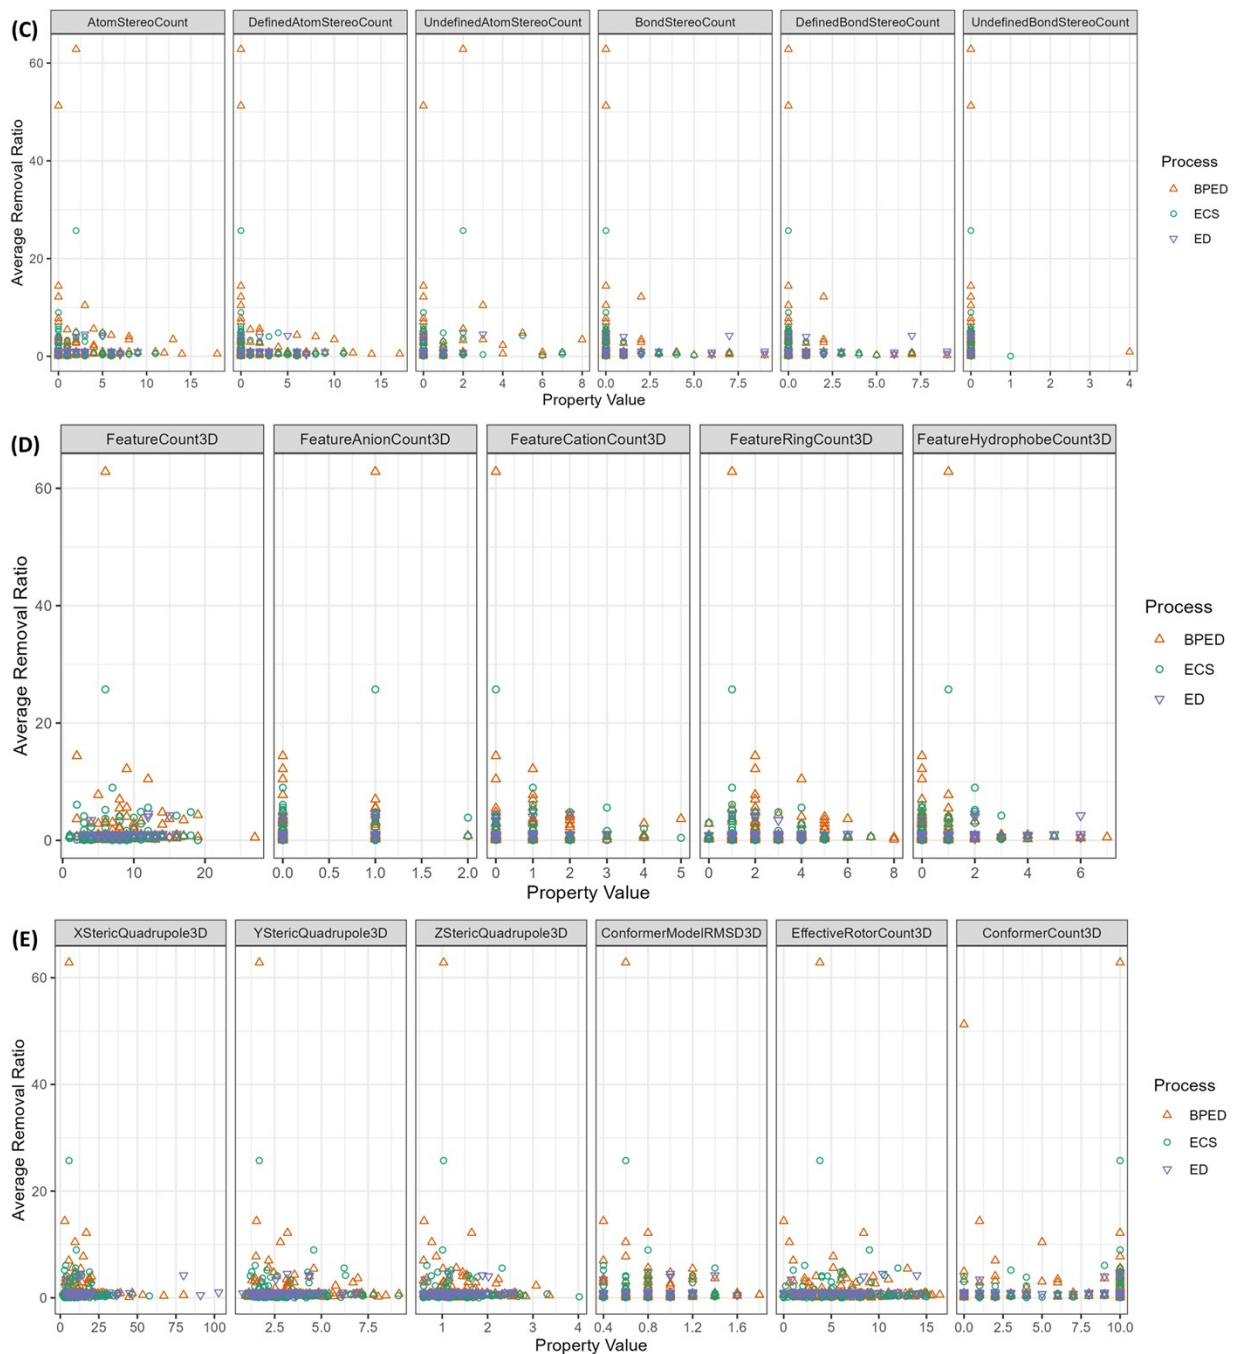

Figure S2-24. Relationships between compound properties and removal ratio for identified compounds that showed significant ( $p < 0.05$ ) changes in feature intensity from influent to effluent or product. Spearman correlation and linear regression results are summarized in Table S2-16 and Table S2-17. (continued)

Table S2-16. Spearman correlation results for relationships between compound properties and fates for identified compounds that showed significant ( $p < 0.05$ ) changes in feature intensity from influent to effluent or product. Boxes have a yellow background if correlations were statistically significant.

|                          | Enrichment Ratio |        |         |        |         |        |
|--------------------------|------------------|--------|---------|--------|---------|--------|
|                          | ECS              |        | ED      |        | BPED    |        |
|                          | p-value          | rho    | p-value | rho    | p-value | rho    |
| XLogP                    | 0.1095           | 0.254  | 0.0831  | 0.397  | 0.7764  | -0.023 |
| ExactMass                | 0.3399           | -0.153 | 0.5670  | 0.136  | 0.0167  | -0.190 |
| TPSA                     | 0.7024           | -0.062 | 0.7646  | -0.071 | 0.6822  | -0.033 |
| Complexity               | 0.1924           | -0.208 | 0.6980  | 0.093  | 0.0057  | -0.219 |
| Charge                   | 0.6182           | -0.080 | -       | -      | 0.5195  | -0.052 |
| HBondDonorCount          | 0.2266           | -0.193 | 0.2862  | -0.251 | 0.5122  | -0.053 |
| HBondAcceptorCount       | 0.2197           | -0.196 | 0.7074  | 0.090  | 0.1235  | -0.123 |
| RotatableBondCount       | 0.1324           | -0.239 | 0.3089  | 0.240  | 0.5493  | -0.048 |
| HeavyAtomCount           | 0.1574           | -0.225 | 0.5136  | 0.155  | 0.0077  | -0.211 |
| AtomStereoCount          | 0.7979           | -0.041 | 0.3473  | 0.222  | 0.2340  | -0.095 |
| DefinedAtomStereoCount   | 0.3199           | -0.159 | 0.2523  | 0.269  | 0.3745  | -0.071 |
| UndefinedAtomStereoCount | 0.4030           | 0.134  | -       | -      | 0.5092  | -0.053 |
| BondStereoCount          | 0.2539           | -0.182 | 0.0400  | 0.463  | 0.9734  | 0.003  |
| DefinedBondStereoCount   | 0.3050           | -0.164 | 0.0400  | 0.463  | 0.9883  | -0.001 |
| UndefinedBondStereoCount | 0.6781           | -0.067 | -       | -      | 0.8101  | 0.019  |
| Volume3D                 | 0.4587           | -0.124 | 0.6536  | 0.114  | 0.0145  | -0.203 |
| XStericQuadrupole3D      | 0.8387           | -0.034 | 0.9675  | 0.010  | 0.2709  | -0.092 |
| YStericQuadrupole3D      | 0.5225           | -0.107 | 0.1704  | 0.338  | 0.1075  | -0.135 |
| ZStericQuadrupole3D      | 0.8387           | 0.034  | 0.4552  | 0.188  | 0.0728  | -0.150 |
| FeatureCount3D           | 0.2294           | -0.200 | 0.6893  | -0.101 | 0.0279  | -0.183 |
| FeatureAnionCount3D      | 0.0219           | 0.371  | 0.1507  | 0.353  | 0.3236  | 0.083  |
| FeatureCationCount3D     | 0.6133           | -0.085 | 0.4664  | -0.183 | 0.3222  | -0.083 |
| FeatureRingCount3D       | 0.3497           | -0.156 | 0.6402  | -0.118 | 0.0038  | -0.240 |
| FeatureHydrophobeCount3D | 0.3981           | -0.141 | 0.5297  | 0.159  | 0.3567  | 0.077  |
| ConformerModelRMSD3D     | 0.2751           | -0.182 | 0.5104  | 0.166  | 0.4168  | -0.068 |
| EffectiveRotorCount3D    | 0.4718           | -0.120 | 0.4642  | 0.184  | 0.5195  | -0.054 |
| ConformerCount3D         | 0.3862           | 0.139  | 0.8518  | -0.045 | 0.7424  | -0.026 |

Table S2-16. Spearman correlation results for relationships between compound properties and fates for identified compounds that showed significant ( $p < 0.05$ ) changes in feature intensity from influent to effluent or product. Boxes have a yellow background if correlations were statistically significant. (continued)

|                          | Removal Ratio |        |         |        |         |        |
|--------------------------|---------------|--------|---------|--------|---------|--------|
|                          | ECS           |        | ED      |        | BPED    |        |
|                          | p-value       | rho    | p-value | rho    | p-value | rho    |
| XLogP                    | 0.0704        | -0.138 | 0.9082  | 0.013  | 0.4565  | -0.056 |
| ExactMass                | 0.2477        | 0.088  | 0.1627  | 0.156  | 0.1979  | 0.096  |
| TPSA                     | 0.0194        | 0.178  | 0.1578  | 0.157  | 0.3898  | 0.064  |
| Complexity               | 0.3269        | 0.075  | 0.0953  | 0.185  | 0.1599  | 0.104  |
| Charge                   | 0.0902        | -0.129 | 0.3704  | -0.100 | 0.1198  | 0.115  |
| HBondDonorCount          | 0.3246        | 0.075  | 0.3683  | 0.101  | 0.7460  | 0.024  |
| HBondAcceptorCount       | 0.0124        | 0.190  | 0.0668  | 0.203  | 0.2569  | 0.084  |
| RotatableBondCount       | 0.4653        | 0.056  | 0.4567  | 0.083  | 0.3058  | -0.076 |
| HeavyAtomCount           | 0.2927        | 0.080  | 0.0645  | 0.205  | 0.2130  | 0.092  |
| AtomStereoCount          | 0.7367        | -0.026 | 0.3746  | 0.099  | 0.0390  | 0.153  |
| DefinedAtomStereoCount   | 0.6352        | -0.036 | 0.5361  | 0.069  | 0.4564  | 0.055  |
| UndefinedAtomStereoCount | 0.4977        | 0.052  | 0.9892  | 0.002  | 0.0634  | 0.137  |
| BondStereoCount          | 0.5980        | -0.040 | 0.7546  | -0.035 | 0.8201  | -0.017 |
| DefinedBondStereoCount   | 0.8374        | -0.016 | 0.7546  | -0.035 | 0.6720  | -0.032 |
| UndefinedBondStereoCount | 0.1050        | -0.124 | -       | -      | 0.3453  | 0.070  |
| Volume3D                 | 0.5869        | 0.046  | 0.0267  | 0.265  | 0.2416  | 0.091  |
| XStericQuadrupole3D      | 0.6618        | 0.037  | 0.4343  | 0.095  | 0.6928  | 0.031  |
| YStericQuadrupole3D      | 0.7715        | 0.024  | 0.0187  | 0.280  | 0.5465  | 0.047  |
| ZStericQuadrupole3D      | 0.7969        | 0.022  | 0.0602  | 0.226  | 0.8865  | -0.011 |
| FeatureCount3D           | 0.0983        | 0.138  | 0.0176  | 0.283  | 0.1477  | 0.112  |
| FeatureAnionCount3D      | 0.2296        | 0.101  | 0.4036  | 0.101  | 0.0713  | 0.139  |
| FeatureCationCount3D     | 0.6938        | 0.033  | 0.0043  | 0.337  | 0.3948  | 0.066  |
| FeatureRingCount3D       | 0.8224        | -0.019 | 0.1293  | 0.183  | 0.0626  | 0.144  |
| FeatureHydrophobeCount3D | 0.5273        | 0.053  | 0.1978  | 0.156  | 0.0736  | -0.138 |
| ConformerModelRMSD3D     | 0.8631        | 0.014  | 0.0857  | 0.207  | 0.9080  | 0.009  |
| EffectiveRotorCount3D    | 0.4695        | 0.061  | 0.1139  | 0.191  | 0.5174  | -0.050 |
| ConformerCount3D         | 0.2306        | 0.092  | 0.1962  | 0.144  | 0.3462  | -0.070 |

Table S2-17. Slopes, intercepts (Int), and R<sup>2</sup> for relationships between compound properties and fates for identified compounds that showed significant ( $p < 0.05$ ) changes in feature intensity from influent to effluent or product. Boxes have a yellow background if correlations were statistically significant based on Spearman correlation (Table S2-16).

|                          | Enrichment Ratio |     |                |         |      |                |        |      |                |
|--------------------------|------------------|-----|----------------|---------|------|----------------|--------|------|----------------|
|                          | ECS              |     |                | ED      |      |                | BPED   |      |                |
|                          | Slope            | Int | R <sup>2</sup> | Slope   | Int  | R <sup>2</sup> | Slope  | Int  | R <sup>2</sup> |
| XLogP                    | 0.52             | 1.4 | 0.0397         | 0.27    | 0.13 | 0.1594         | 0.12   | 0.80 | 0.0045         |
| ExactMass                | -0.0078          | 4.8 | 0.0259         | -       | 1.3  | 0.0014         | 0.0029 | 0.30 | 0.0066         |
| TPSA                     | 0.0043           | 2.4 | 0.0008         | -0.0054 | 1.5  | 0.0436         | 0.0071 | 0.65 | 0.0049         |
| Complexity               | -0.0045          | 3.9 | 0.0129         | -0.0010 | 1.5  | 0.0352         | 0.0011 | 0.72 | 0.0036         |
| Charge                   | -2.5             | 2.7 | 0.0042         | -       | -    | -              | -1.1   | 1.1  | 0.0004         |
| HBondDonorCount          | -1.1             | 3.9 | 0.0515         | -0.13   | 1.3  | 0.0200         | -      | 1.1  | 3.07E-06       |
| HBondAcceptorCount       | -0.20            | 3.4 | 0.0093         | -0.079  | 1.4  | 0.0222         | 0.14   | 0.59 | 0.0052         |
| RotatableBondCount       | -0.082           | 3.2 | 0.0115         | 0.13    | 0.35 | 0.2258         | 0.027  | 0.98 | 0.0009         |
| HeavyAtomCount           | -0.15            | 5.5 | 0.0359         | -0.0086 | 1.3  | 0.0025         | 0.035  | 0.41 | 0.0050         |
| AtomStereoCount          | -0.90            | 3.3 | 0.0271         | 0.018   | 1.1  | 0.0003         | -0.18  | 1.3  | 0.0085         |
| DefinedAtomStereoCount   | -0.83            | 3.1 | 0.0207         | -0.037  | 1.1  | 0.0015         | -0.16  | 1.3  | 0.0057         |
| UndefinedAtomStereoCount | -0.61            | 2.8 | 0.0032         | 0.41    | 1.0  | 0.0249         | -0.21  | 1.2  | 0.0023         |
| BondStereoCount          | -2.0             | 3.0 | 0.0213         | 1.8     | 0.56 | 0.4298         | -0.057 | 1.1  | 8.42E-05       |
| DefinedBondStereoCount   | -1.9             | 3.0 | 0.0168         | 1.8     | 0.56 | 0.4298         | 0.015  | 1.1  | 4.45E-06       |
| UndefinedBondStereoCount | -2.4             | 2.7 | 0.0040         | -       | -    | -              | -0.28  | 1.1  | 0.0005         |
| Volume3D                 | -0.014           | 5.6 | 0.0190         | 0.00035 | 0.89 | 0.0005         | 0.005  | 0.02 | 0.0095         |
| XStericQuadrupole3D      | 0.0039           | 2.8 | 0.0001         | -0.010  | 1.1  | 0.0021         | 0.051  | 0.58 | 0.0080         |
| YStericQuadrupole3D      | -0.86            | 5.1 | 0.0472         | 0.095   | 0.66 | 0.0222         | 0.27   | 0.37 | 0.0092         |
| ZStericQuadrupole3D      | -0.90            | 3.9 | 0.0041         | -0.11   | 1.1  | 0.0040         | 0.36   | 0.70 | 0.0015         |
| FeatureCount3D           | -0.30            | 4.7 | 0.0247         | -0.045  | 1.3  | 0.0296         | 0.067  | 0.64 | 0.0031         |
| FeatureAnionCount3D      | 5.1              | 2.3 | 0.1011         | 1.1     | 0.74 | 0.1566         | 0.087  | 1.1  | 7.11E-05       |
| FeatureCationCount3D     | -1.7             | 4.1 | 0.0512         | -0.32   | 1.1  | 0.0241         | 0.13   | 1.0  | 0.0007         |
| FeatureRingCount3D       | -0.74            | 4.0 | 0.0205         | -0.25   | 1.6  | 0.1214         | 0.21   | 0.68 | 0.0037         |
| FeatureHydrophobeCount3D | -1.6             | 4.1 | 0.0529         | 0.39    | 0.74 | 0.0932         | 0.20   | 0.98 | 0.0021         |
| ConformerModelRMSD3D     | -1.8             | 4.2 | 0.0060         | 1.8     | -    | 0.2009         | 2.6    | -    | 0.0261         |
| EffectiveRotorCount3D    | -0.072           | 3.3 | 0.0020         | 0.12    | 0.32 | 0.1710         | 0.14   | 0.40 | 0.0139         |
| ConformerCount3D         | 0.20             | 1.2 | 0.0139         | 0.00050 | 1.1  | 1.91E-06       | 0.083  | 0.55 | 0.0060         |

Table S2-17. Slopes, intercepts (Int), and R<sup>2</sup> for relationships between compound properties and fates for identified compounds that showed significant ( $p < 0.05$ ) changes in feature intensity from influent to effluent or product. Boxes have a yellow background if correlations were statistically significant based on Spearman correlation (Table S2-16). (continued)

|                          | Removal Ratio |      |                |         |      |                |         |     |                |
|--------------------------|---------------|------|----------------|---------|------|----------------|---------|-----|----------------|
|                          | ECS           |      |                | ED      |      |                | BPED    |     |                |
|                          | Slope         | Int  | R <sup>2</sup> | Slope   | Int  | R <sup>2</sup> | Slope   | Int | R <sup>2</sup> |
| XLogP                    | -0.10         | 1.4  | 0.0154         | -0.017  | 1.1  | 0.0085         | -0.40   | 3.0 | 0.0258         |
| ExactMass                | -0.0018       | 1.7  | 0.0129         | 0.00041 | 0.82 | 0.0071         | -0.0039 | 3.1 | 0.0071         |
| TPSA                     | 0.0013        | 0.96 | 0.0007         | 0.0020  | 0.83 | 0.0090         | 0.0057  | 1.4 | 0.0014         |
| Complexity               | -0.00076      | 1.4  | 0.0075         | 0.00053 | 0.71 | 0.0410         | -0.0020 | 2.8 | 0.0092         |
| Charge                   | -0.74         | 1.1  | 0.0030         | -0.250  | 0.98 | 0.0028         | -0.021  | 1.8 | 1.29E-07       |
| HBondDonorCount          | 0.0089        | 1.0  | 3.94E-05       | 0.069   | 0.86 | 0.0159         | 0.028   | 1.8 | 4.94E-05       |
| HBondAcceptorCount       | -0.0033       | 1.1  | 1.79E-05       | 0.018   | 0.90 | 0.0025         | 0.11    | 1.4 | 0.0014         |
| RotatableBondCount       | -0.019        | 1.2  | 0.0042         | -0.0013 | 0.99 | 0.0003         | 0.025   | 1.7 | 0.0004         |
| HeavyAtomCount           | -0.027        | 1.7  | 0.0145         | 0.0077  | 0.78 | 0.0122         | -0.059  | 3.3 | 0.0086         |
| AtomStereoCount          | -0.043        | 1.1  | 0.0028         | 0.046   | 0.92 | 0.0174         | -0.048  | 1.9 | 0.0006         |
| DefinedAtomStereoCount   | -0.084        | 1.2  | 0.0103         | 0.021   | 0.95 | 0.0035         | -0.14   | 2.0 | 0.0040         |
| UndefinedAtomStereoCount | 0.25          | 0.94 | 0.0143         | 0.52    | 0.91 | 0.1100         | 0.45    | 1.6 | 0.0081         |
| BondStereoCount          | -0.15         | 1.1  | 0.0042         | 0.052   | 0.94 | 0.0171         | -0.20   | 1.9 | 0.0024         |
| DefinedBondStereoCount   | -0.15         | 1.1  | 0.0038         | 0.052   | 0.94 | 0.0171         | -0.20   | 1.9 | 0.0023         |
| UndefinedBondStereoCount | -1.0          | 1.1  | 0.0011         | 0.15    | 1.5  | 0.0044         | -0.23   | 1.8 | 0.0001         |
| Volume3D                 | -0.0034       | 1.9  | 0.0151         | 0.0019  | 0.52 | 0.0536         | -0.0061 | 3.2 | 0.0140         |
| XStericQuadrupole3D      | -0.032        | 1.5  | 0.0155         | 0.0071  | 0.90 | 0.0267         | -0.046  | 2.2 | 0.0092         |
| YStericQuadrupole3D      | -0.074        | 1.3  | 0.0021         | 0.10    | 0.72 | 0.0332         | -0.26   | 2.4 | 0.0079         |
| ZStericQuadrupole3D      | -0.36         | 1.6  | 0.0070         | 0.16    | 0.80 | 0.0112         | -0.77   | 2.6 | 0.0067         |
| FeatureCount3D           | 0.0017        | 1.1  | 6.60E-06       | 0.064   | 0.49 | 0.0717         | -0.04   | 1.9 | 0.0010         |
| FeatureAnionCount3D      | 0.98          | 0.91 | 0.0326         | 0.29    | 0.94 | 0.0264         | 2.2     | 1.2 | 0.0303         |
| FeatureCationCount3D     | -0.096        | 1.2  | 0.0015         | 0.15    | 0.93 | 0.0241         | -0.18   | 1.7 | 0.0014         |
| FeatureRingCount3D       | -0.22         | 1.6  | 0.0197         | -0.062  | 1.2  | 0.0079         | -0.22   | 2.2 | 0.0046         |
| FeatureHydrophobeCount3D | 0.10          | 1.0  | 0.0018         | 0.13    | 0.88 | 0.0658         | -0.18   | 1.7 | 0.0019         |
| ConformerModelRMSD3D     | -0.75         | 1.7  | 0.0086         | 0.65    | 0.51 | 0.0455         | -1.7    | 3.0 | 0.0097         |
| EffectiveRotorCount3D    | -0.035        | 1.3  | 0.0031         | 0.048   | 0.75 | 0.0527         | -0.12   | 2.4 | 0.0094         |
| ConformerCount3D         | 0.064         | 0.63 | 0.0146         | 0.019   | 0.85 | 0.0115         | -0.13   | 2.8 | 0.0062         |

## References

- 1 D. J. Sobota, J. E. Compton, M. L. McCrackin and S. Singh, Cost of reactive nitrogen release from human activities to the environment in the United States, *Environ. Res. Lett.*, 2015, **10**, 025006.
- 2 EPA, 2007.
- 3 P. L. McCarty, J. Bae and J. Kim, Domestic Wastewater Treatment as a Net Energy Producer—Can This be Achieved?, *Environ. Sci. Technol.*, 2011, **45**, 7100–7106.
- 4 I. Chorkendorff and J. W. Niemantsverdriet, *Concepts of Modern Catalysis and Kinetics*, Wiley, 1st edn., 2003.
- 5 J. W. Erisman, M. A. Sutton, J. Galloway, Z. Klimont and W. Winiwarter, How a century of ammonia synthesis changed the world, *Nature Geosci.*, 2008, **1**, 636–639.
- 6 V. Kyriakou, I. Garagounis, A. Vourros, E. Vasileiou and M. Stoukides, An Electrochemical Haber-Bosch Process, *Joule*, 2020, **4**, 142–158.
- 7 H. Jönsson, A. Baky, U. Jeppsson, D. Hellström and E. Kärrman, Composition of urine, faeces, greywater and biowaste, 2005, 49.
- 8 T. A. Larsen, A. C. Alder, R. I. L. Eggen, M. Maurer and J. Lienert, Source Separation: Will We See a Paradigm Shift in Wastewater Handling?, *Environ. Sci. Technol.*, 2009, **43**, 6121–6125.
- 9 J. Lienert, M. Haller, A. Berner, M. Stauffacher and T. A. Larsen, How farmers in Switzerland perceive fertilizers from recycled anthropogenic nutrients (urine), *Water Science and Technology*, 2003, **48**, 47–56.
- 10 C. Pahl-Wostl, A. Schönborn, N. Willi, J. Muncke and T. A. Larsen, Investigating consumer attitudes towards the new technology of urine separation, *Water Sci Technol*, 2003, **48**, 57–65.
- 11 T. A. Larsen, H. Gruendl and C. Binz, The potential contribution of urine source separation to the SDG agenda – a review of the progress so far and future development options, *Environ. Sci.: Water Res. Technol.*, 2021, **7**, 1161–1176.
- 12 A. Segrè Cohen, N. G. Love, K. K. Nace and J. Árvai, Consumers' Acceptance of Agricultural Fertilizers Derived from Diverted and Recycled Human Urine, *Environ. Sci. Technol.*, 2020, **54**, 5297–5305.
- 13 T. Schreiber, S. Opperman, R. Hardin, J. Cavicchi, A. Pallmeyer, K. Nace and N. Love, Nested risks and responsibilities: Perspectives on fertilizer from human urine in two U.S. regions, *Journal of Agriculture, Food Systems, and Community Development*, 2021, **10**, 1-22-1–22.
- 14 J. Lienert and T. A. Larsen, High Acceptance of Urine Source Separation in Seven European Countries: A Review, *Environ. Sci. Technol.*, 2010, **44**, 556–566.
- 15 P. Simha, M. A. Barton, L. F. Perez-Mercado, J. R. McConville, C. Lalander, M. E. Magri, S. Dutta, H. Kabir, A. Selvakumar, X. Zhou, T. Martin, T. Kizos, R. Kataki, Y. Gerchman, R. Herscu-Kluska, D. Alrousan, E. G. Goh, D. Elenciuc, A. Głowacka, L. Korculanin, R. V. Tzeng, S. S. Ray, C. Niwagaba, C. Prouty, J. R. Mihelcic and B. Vinnerås, Willingness among food consumers to recycle human urine as crop fertiliser: Evidence from a multinational survey, *Science of The Total Environment*, 2021, **765**, 144438.
- 16 P. Kuntke, M. Rodríguez Arredondo, L. Widyakristi, A. ter Heijne, T. H. J. A. Sleutels, H. V. M. Hamelers and C. J. N. Buisman, Hydrogen Gas Recycling for Energy Efficient Ammonia Recovery in Electrochemical Systems, *Environ. Sci. Technol.*, 2017, **51**, 3110–3116.
- 17 P. Zamora, T. Georgieva, A. Ter Heijne, T. H. J. A. Sleutels, A. W. Jeremiasse, M. Saakes, C. J. N. Buisman and P. Kuntke, Ammonia recovery from urine in a scaled-up Microbial Electrolysis Cell, *Journal of Power Sources*, 2017, **356**, 491–499.
- 18 P. Kuntke, K. M. Śmiech, H. Bruning, G. Zeeman, M. Saakes, T. H. J. A. Sleutels, H. V. M. Hamelers and C. J. N. Buisman, Ammonium recovery and energy production from urine by a microbial fuel cell, *Water Research*, 2012, **46**, 2627–2636.
- 19 W. A. Tarpeh, J. M. Barazesh, T. Y. Cath and K. L. Nelson, Electrochemical Stripping to Recover Nitrogen from Source-Separated Urine, *Environ. Sci. Technol.*, 2018, **52**, 1453–1460.

- 20 D. Appling, M. Habteselassie, D. Radcliffe and J. Bradshaw, Preliminary Study on the Effect of Wastewater Storage in Septic Tank on E. coli Concentration in Summer, *Water*, 2013, **5**, 1141–1151.
- 21 H. Dong, L. Wei and W. A. Tarpeh, Electro-assisted regeneration of pH-sensitive ion exchangers for sustainable phosphate removal and recovery, *Water Research*, 2020, **184**, 116167.
- 22 Codiga Resource Recovery Center, CR2C Treatment Monitoring Dashboard, <http://cr2c-monitoring.appspot.com/>, (accessed 8 March 2021).
- 23 T. A. Larsen, M. E. Riechmann and K. M. Udert, State of the art of urine treatment technologies: A critical review., *Water Research X*, 2021, **13**, 100114.
- 24 B. P. Chaplin, The Prospect of Electrochemical Technologies Advancing Worldwide Water Treatment, *Acc. Chem. Res.*, 2019, **52**, 596–604.
- 25 J. Radjenovic and D. L. Sedlak, Challenges and Opportunities for Electrochemical Processes as Next-Generation Technologies for the Treatment of Contaminated Water, *Environ. Sci. Technol.*, 2015, **49**, 11292–11302.
- 26 J. Lienert, T. Bürki and B. I. Escher, Reducing micropollutants with source control: substance flow analysis of 212 pharmaceuticals in faeces and urine, *Water Science and Technology*, 2007, **56**, 87–96.
- 27 T. Heberer, Occurrence, fate, and removal of pharmaceutical residues in the aquatic environment: a review of recent research data, *Toxicology Letters*, 2002, **131**, 5–17.
- 28 O. González, B. Bayarri, J. Aceña, S. Pérez and D. Barceló, Treatment Technologies for Wastewater Reuse: Fate of Contaminants of Emerging Concern, *Handbook of Environmental Chemistry*, 2016, **45**, 5–37.
- 29 D. W. Kolpin, E. T. Furlong, M. T. Meyer, E. M. Thurman, S. D. Zaugg, L. B. Barber and H. T. Buxton, Pharmaceuticals, Hormones, and Other Organic Wastewater Contaminants in U.S. Streams, 1999–2000: A National Reconnaissance, *Environ. Sci. Technol.*, 2002, **36**, 1202–1211.
- 30 T. R. Romeyn, W. Harijanto, S. Sandoval, S. Delagah and M. Sharbatmaleki, Contaminants of emerging concern in reverse osmosis brine concentrate from indirect/direct water reuse applications, *Water Science and Technology*, 2016, **73**, 236–250.
- 31 S. H. Joo and B. Tansel, Novel technologies for reverse osmosis concentrate treatment: A review, *Journal of Environmental Management*, 2015, **150**, 322–335.
- 32 I. Köpping, C. S. McArdell, E. Borowska, M. A. Böhler and K. M. Udert, Removal of pharmaceuticals from nitrified urine by adsorption on granular activated carbon, *Water Research X*, 2020, **9**, 100057.
- 33 W. Pronk, H. Palmquist, M. Biebow and M. Boller, Nanofiltration for the separation of pharmaceuticals from nutrients in source-separated urine, *Water Research*, 2006, **40**, 1405–1412.
- 34 J. A. Clark, Y. Yang, N. C. Ramos and H. W. Hillhouse, Selective oxidation of pharmaceuticals and suppression of perchlorate formation during electrolysis of fresh human urine, *Water Research*, 2021, **198**, 117106.
- 35 N. Demissie, P. Simha, F. Y. Lai, L. Ahrens, D. Mussabek, A. Desta and B. Vinnerås, Degradation of 75 organic micropollutants in fresh human urine and water by UV advanced oxidation process, *Water Research*, 2023, **242**, 120221.
- 36 A. Recherche, F. Tettenborn, J. Behrendt and R. Otterpohl, *Resource recovery and removal of pharmaceutical residues Treatment of separate collected urine*, Institute of Wastewater Management and Water Protection Hamburg University of Technology, 2007.
- 37 W. A. Tarpeh, I. Wald, M. Wiprächtiger and K. L. Nelson, Effects of operating and design parameters on ion exchange columns for nutrient recovery from urine, *Environ. Sci.: Water Res. Technol.*, 2018, **4**, 828–838.
- 38 B. Schürmann, W. Everding, D. Montag and J. Pinnekamp, Fate of pharmaceuticals and bacteria in stored urine during precipitation and drying of struvite, *Water Science and Technology*, 2012, **65**, 1774–1780.
- 39 B. I. Escher, W. Pronk, M. J.-F. Suter and M. Maurer, Monitoring the Removal Efficiency of Pharmaceuticals and Hormones in Different Treatment Processes of Source-Separated Urine with Bioassays, *Environ. Sci. Technol.*, 2006, **40**, 5095–5101.

- 40 Z. Pan, C. Song, L. Li, H. Wang, Y. Pan, C. Wang, J. Li, T. Wang and X. Feng, Membrane technology coupled with electrochemical advanced oxidation processes for organic wastewater treatment: Recent advances and future prospects, *Chemical Engineering Journal*, 2019, **376**, 120909.
- 41 E. Mordačiková, M. Vojs, K. Grabicová, M. Marton, P. Michniak, V. Řeháček, A. Bořík, R. Grabic, J. Bruncko, T. Mackulák and A. Vojs Staňová, Influence of boron doped diamond electrodes properties on the elimination of selected pharmaceuticals from wastewater, *Journal of Electroanalytical Chemistry*, 2020, **862**, 114007.
- 42 C. Heim, M. Rajab, G. Greco, S. Grosse, J. E. Drewes, T. Letzel and B. Helmreich, Fate of Diclofenac and Its Transformation and Inorganic By-Products in Different Water Matrices during Electrochemical Advanced Oxidation Process Using a Boron-Doped Diamond Electrode, *Water*, 2020, **12**, 1686.
- 43 J. T. Jasper, O. S. Shafaat and M. R. Hoffmann, Electrochemical Transformation of Trace Organic Contaminants in Latrine Wastewater, *Environ. Sci. Technol.*, 2016, **50**, 10198–10208.
- 44 S. Garcia-Segura, J. Keller, E. Brillas and J. Radjenovic, Removal of organic contaminants from secondary effluent by anodic oxidation with a boron-doped diamond anode as tertiary treatment, *Journal of Hazardous Materials*, 2015, **283**, 551–557.
- 45 A. Farhat, J. Keller, S. Tait and J. Radjenovic, Removal of Persistent Organic Contaminants by Electrochemically Activated Sulfate, *Environ. Sci. Technol.*, 2015, **49**, 14326–14333.
- 46 Y. Chen, S. Li and J. Hu, Photoelectrocatalytic degradation of organics and formation of disinfection byproducts in reverse osmosis concentrate, *Water Research*, 2020, **168**, 115105.
- 47 H. Lu, W. Zou, P. Chai, J. Wang and L. Bazinet, Feasibility of antibiotic and sulfate ions separation from wastewater using electrodialysis with ultrafiltration membrane, *Journal of Cleaner Production*, 2016, **112**, 3097–3105.
- 48 A. R. Ferreira, N. Couto, P. Guedes, J. Pinto, E. P. Mateus and A. B. Ribeiro, Electrodialytic 2-compartment cells for emerging organic contaminants removal from effluent, *Journal of Hazardous Materials*, 2018, **358**, 467–474.
- 49 Z. Li, R. Dai, B. Yang, M. Chen, X. Wang and Z. Wang, An electrochemical membrane biofilm reactor for removing sulfonamides from wastewater and suppressing antibiotic resistance development: Performance and mechanisms, *Journal of Hazardous Materials*, 2021, **404**, 124198.
- 50 P. Guedes, E. P. Mateus, J. Almeida, A. R. Ferreira, N. Couto and A. B. Ribeiro, Electrodialytic treatment of sewage sludge: Current intensity influence on phosphorus recovery and organic contaminants removal, *Chemical Engineering Journal*, 2016, **306**, 1058–1066.
- 51 L. J. Banasiak and A. I. Schäfer, Sorption of steroidal hormones by electrodialysis membranes, *Journal of Membrane Science*, 2010, **365**, 198–205.
- 52 K. Arola, A. Ward, M. Mänttari, M. Kallioinen and D. Batstone, Transport of pharmaceuticals during electrodialysis treatment of wastewater, *Water Research*, 2019, **161**, 496–504.
- 53 K. Noguera-Oviedo and D. S. Aga, Lessons learned from more than two decades of research on emerging contaminants in the environment, *Journal of Hazardous Materials*, 2016, **316**, 242–251.
- 54 K. E. Manz, A. Feerick, J. M. Braun, Y.-L. Feng, A. Hall, J. Koelmel, C. Manzano, S. R. Newton, K. D. Pennell, B. J. Place, K. J. Godri Pollitt, C. Prasse and J. A. Young, Non-targeted analysis (NTA) and suspect screening analysis (SSA): a review of examining the chemical exposome, *J Expo Sci Environ Epidemiol*, 2023, **33**, 524–536.
- 55 D. E. Helbling, J. Hollender, H.-P. E. Kohler, H. Singer and K. Fenner, High-Throughput Identification of Microbial Transformation Products of Organic Micropollutants, *Environ. Sci. Technol.*, 2010, **44**, 6621–6627.
- 56 M. Krauss, H. Singer and J. Hollender, LC–high resolution MS in environmental analysis: from target screening to the identification of unknowns, *Anal Bioanal Chem*, 2010, **397**, 943–951.
- 57 A. Agüera, P. Plaza-Bolaños and F. G. A. Fernández, in *Current Developments in Biotechnology and Bioengineering*, eds S. Varjani, A. Pandey, R. D. Tyagi, H. H. Ngo and C. Larroche, Elsevier, 2020, pp. 503–525.
- 58 T. Bader, W. Schulz, T. Lucke, W. Seitz and R. Winzenbacher, in *ACS Symposium Series*, eds J. E. Drewes and T. Letzel, American Chemical Society, Washington, DC, 2016, vol. 1242, pp. 49–70.

- 59 A. Lai, R. R. Singh, L. Kovalova, O. Jaeggi, T. Kondic and E. L. Schymanski, *Retrospective Non-target Analysis to Support Regulatory Water Monitoring: From Masses of Interest to Recommendations via in silico workflows*, In Review, 2020.
- 60 W. Brack, J. Hollender, M. L. de Alda, C. Müller, T. Schulze, E. Schymanski, J. Slobodnik and M. Krauss, High-resolution mass spectrometry to complement monitoring and track emerging chemicals and pollution trends in European water resources, *Environ Sci Eur*, 2019, **31**, 62.
- 61 A. López, P. Dualde, V. Yusà and C. Coscollà, Retrospective analysis of pesticide metabolites in urine using liquid chromatography coupled to high-resolution mass spectrometry, *Talanta*, 2016, **160**, 547–555.
- 62 B. González-Gaya, N. Lopez-Herguedas, D. Bilbao, L. Mijangos, A. M. Iker, N. Etxebarria, M. Irazola, A. Prieto, M. Olivares and O. Zuloaga, Suspect and non-target screening: the last frontier in environmental analysis, *Analytical Methods*, 2021, **13**, 1876–1904.
- 63 S. Murgolo, S. Franz, H. Arab, M. Bestetti, E. Falletta and G. Mascolo, Degradation of emerging organic pollutants in wastewater effluents by electrochemical photocatalysis on nanostructured TiO<sub>2</sub> meshes, *Water Research*, 2019, **164**, 114920.
- 64 M. Rajab, G. Greco, C. Heim, B. Helmreich and T. Letzel, Serial coupling of RP and zwitterionic hydrophilic interaction LC–MS: Suspects screening of diclofenac transformation products by oxidation with a boron-doped diamond electrode, *Journal of Separation Science*, 2013, **36**, 3011–3018.
- 65 Rich Earth Institute, Rich Earth Institute: Regulation, <https://richearthinstitute.org/our-work/regulation/>, (accessed 11 May 2022).
- 66 B. P. Chaplin, Critical review of electrochemical advanced oxidation processes for water treatment applications, *Environ. Sci.: Processes Impacts*, 2014, **16**, 1182–1203.
- 67 S. Garcia-Segura, A. B. Nienhauser, A. S. Fajardo, R. Bansal, C. L. Coonrod, J. D. Fortner, M. Marcos-Hernández, T. Rogers, D. Villagran, M. S. Wong and P. Westerhoff, Disparities between experimental and environmental conditions: Research steps toward making electrochemical water treatment a reality, *Current Opinion in Electrochemistry*, 2020, **22**, 9–16.
- 68 A. Kogler, M. Farmer, J. A. Simon, S. Tilmans, G. F. Wells and W. A. Tarpeh, Systematic Evaluation of Emerging Wastewater Nutrient Removal and Recovery Technologies to Inform Practice and Advance Resource Efficiency, *ACS EST Eng.*, 2021, **1**, 662–684.
- 69 S. D. Richardson, M. J. Plewa, E. D. Wagner, R. Schoeny and D. M. DeMarini, Occurrence, genotoxicity, and carcinogenicity of regulated and emerging disinfection by-products in drinking water: A review and roadmap for research, *Mutation Research/Reviews in Mutation Research*, 2007, **636**, 178–242.
- 70 E. D. Wagner, K.-M. Hsu, A. Lagunas, W. A. Mitch and M. J. Plewa, Comparative genotoxicity of nitrosamine drinking water disinfection byproducts in Salmonella and mammalian cells, *Mutat Res*, 2012, **741**, 109–115.
- 71 E. D. Wagner and M. J. Plewa, CHO cell cytotoxicity and genotoxicity analyses of disinfection by-products: An updated review, *Journal of Environmental Sciences*, 2017, **58**, 64–76.
- 72 M. Diana, M. Felipe-Sotelo and T. Bond, Disinfection byproducts potentially responsible for the association between chlorinated drinking water and bladder cancer: A review, *Water Research*, 2019, **162**, 492–504.
- 73 C. M. Villanueva, S. Cordier, L. Font-Ribera, L. A. Salas and P. Levallois, Overview of Disinfection By-products and Associated Health Effects, *Curr Envir Health Rpt*, 2015, **2**, 107–115.
- 74 S. D. Richardson and M. J. Plewa, To regulate or not to regulate? What to do with more toxic disinfection by-products?, *Journal of Environmental Chemical Engineering*, 2020, **8**, 103939.
- 75 X.-F. Li and W. A. Mitch, Drinking Water Disinfection Byproducts (DBPs) and Human Health Effects: Multidisciplinary Challenges and Opportunities, *Environ. Sci. Technol.*, 2018, **52**, 1681–1689.
- 76 Y. Chen, W. Chen, H. Huang, H. Zeng, L. Tan, Y. Pang, J. Ghani and S. Qi, Occurrence of N-nitrosamines and their precursors in the middle and lower reaches of Yangtze River water, *Environmental Research*, 2021, **195**, 110673.

- 77 Z. Li, G. Song, Y. Bi, W. Gao, A. He, Y. Lu, Y. Wang and G. Jiang, Occurrence and Distribution of Disinfection Byproducts in Domestic Wastewater Effluent, Tap Water, and Surface Water during the SARS-CoV-2 Pandemic in China, *Environ. Sci. Technol.*, 2021, **55**, 4103–4114.
- 78 X. Luan, X. Liu, C. Fang, W. Chu and Z. Xu, Ecotoxicological effects of disinfected wastewater effluents: a short review of in vivo toxicity bioassays on aquatic organisms, *Environ. Sci.: Water Res. Technol.*, 2020, **6**, 2275–2286.
- 79 R. Xiao, T. Ou, S. Ding, C. Fang, Z. Xu and W. Chu, Disinfection by-products as environmental contaminants of emerging concern: a review on their occurrence, fate and removal in the urban water cycle, *Critical Reviews in Environmental Science and Technology*, 2022, 1–28.
- 80 K. Watson, G. Shaw, F. D. L. Leusch and N. L. Knight, Chlorine disinfection by-products in wastewater effluent: Bioassay-based assessment of toxicological impact, *Water Research*, 2012, **46**, 6069–6083.
- 81 H. Cui, B. Chen, Y. Jiang, Y. Tao, X. Zhu and Z. Cai, Toxicity of 17 Disinfection By-products to Different Trophic Levels of Aquatic Organisms: Ecological Risks and Mechanisms, *Environ. Sci. Technol.*, 2021, **55**, 10534–10541.
- 82 J. Liu and X. Zhang, Comparative toxicity of new halophenolic DBPs in chlorinated saline wastewater effluents against a marine alga: Halophenolic DBPs are generally more toxic than haloaliphatic ones, *Water Research*, 2014, **65**, 64–72.
- 83 M. Yang and X. Zhang, Comparative Developmental Toxicity of New Aromatic Halogenated DBPs in a Chlorinated Saline Sewage Effluent to the Marine Polychaete *Platynereis dumerilii*, *Environ. Sci. Technol.*, 2013, **47**, 10868–10876.
- 84 A. Fumasoli, B. Etter, B. Sterkele, E. Morgenroth and K. M. Udert, Operating a pilot-scale nitrification/distillation plant for complete nutrient recovery from urine, *Water Sci Technol*, 2016, **73**, 215–222.
- 85 J. M. Barazesh, C. Prasse and D. L. Sedlak, Electrochemical Transformation of Trace Organic Contaminants in the Presence of Halide and Carbonate Ions, *Environ. Sci. Technol.*, 2016, **50**, 10143–10152.
- 86 M. Rodríguez Arredondo, P. Kuntke, A. ter Heijne, H. V. M. Hamelers and C. J. N. Buisman, Load ratio determines the ammonia recovery and energy input of an electrochemical system, *Water Research*, 2017, **111**, 330–337.
- 87 E. Lacasa, S. Cotillas, C. Saez, J. Lobato, P. Cañizares and M. A. Rodrigo, Environmental applications of electrochemical technology. What is needed to enable full-scale applications?, *Current Opinion in Electrochemistry*, 2019, **16**, 149–156.
- 88 M. Rodrigues, T. T. de Mattos, T. Sleutels, A. ter Heijne, H. V. M. Hamelers, C. J. N. Buisman and P. Kuntke, Minimal Bipolar Membrane Cell Configuration for Scaling Up Ammonium Recovery, *ACS Sustainable Chem. Eng.*, 2020, **8**, 17359–17367.
- 89 M. A. Blommaert, D. Aili, R. A. Tufa, Q. Li, W. A. Smith and D. A. Vermaas, Insights and Challenges for Applying Bipolar Membranes in Advanced Electrochemical Energy Systems, *ACS Energy Lett.*, 2021, **6**, 2539–2548.
- 90 W. A. Tarpeh, Y. Du, C. M. G. Carpenter, E. E. Rodriguez, D. E. Helbling, D. S. Aga, N. G. Love and K. R. Wigginton, A Unit Process Approach to Nontarget Screening of Organic Contaminants during Urine Treatment, *ACS EST Eng.*, 2023, **3**, 590–601.
- 91 R. Helmus, T. L. ter Laak, A. P. van Wezel, P. de Voogt and E. L. Schymanski, patRoon: open source software platform for environmental mass spectrometry based non-target screening, *J Cheminform*, 2021, **13**, 1.
- 92 R. Helmus, B. van de Velde, A. M. Brunner, T. L. ter Laak, A. P. van Wezel and E. L. Schymanski, patRoon 2.0: Improved non-target analysis workflows including automated transformation product screening, *Journal of Open Source Software*, 2022, **7**, 4029.
- 93 A. L. Pochodylo and D. E. Helbling, Emerging investigators series: prioritization of suspect hits in a sensitive suspect screening workflow for comprehensive micropollutant characterization in environmental samples, *Environ. Sci.: Water Res. Technol.*, 2017, **3**, 54–65.

- 94 E. Parry and T. M. Young, Comparing targeted and non-targeted high-resolution mass spectrometric approaches for assessing advanced oxidation reactor performance, *Water Research*, 2016, **104**, 72–81.
- 95 J. E. Schollée, E. L. Schymanski and J. Hollender, in *ACS Symposium Series*, eds J. E. Drewes and T. Letzel, American Chemical Society, Washington, DC, 2016, vol. 1241, pp. 45–65.
- 96 K. E. Furst, R. M. Coyte, M. Wood, A. Vengosh and W. A. Mitch, Disinfection Byproducts in Rajasthan, India: Are Trihalomethanes a Sufficient Indicator of Disinfection Byproduct Exposure in Low-Income Countries?, *Environ. Sci. Technol.*, 2019, **53**, 12007–12017.
- 97 Y.-H. Chuang, D. L. McCurry, H. Tung and W. A. Mitch, Formation Pathways and Trade-Offs between Haloacetamides and Haloacetaldehydes during Combined Chlorination and Chloramination of Lignin Phenols and Natural Waters, *Environ. Sci. Technol.*, 2015, **49**, 14432–14440.
- 98 M. Roman, L. H. Van Dijk, L. Gutierrez, M. Vanoppen, J. W. Post, B. A. Wols, E. R. Cornelissen and A. R. D. Verliefde, Key physicochemical characteristics governing organic micropollutant adsorption and transport in ion-exchange membranes during reverse electrodialysis, *Desalination*, 2019, **468**, 114084.
- 99 M. Roman, L. Gutierrez, L. H. Van Dijk, M. Vanoppen, J. W. Post, B. A. Wols, E. R. Cornelissen and A. R. D. Verliefde, Effect of pH on the transport and adsorption of organic micropollutants in ion-exchange membranes in electrodialysis-based desalination, *Separation and Purification Technology*, 2020, **252**, 117487.
- 100 J. D. García-Espinoza, P. Mijaylova-Nacheva and M. Avilés-Flores, Electrochemical carbamazepine degradation: Effect of the generated active chlorine, transformation pathways and toxicity, *Chemosphere*, 2018, **192**, 142–151.
- 101 Ne-Boc-L-Lysine, <https://www.chembk.com/en/chem/Ne-Boc-L-Lysine>, (accessed 27 November 2025).
- 102 Amino Acids, <https://www.vanderbilt.edu/AnS/Chemistry/Rizzo/stuff/AA/AminoAcids.html>, (accessed 27 November 2025).
- 103 C. Wald, The urine revolution: how recycling pee could help to save the world, *Nature*, 2022, **602**, 202–206.
- 104 N. Moore, S. Ebrahimi, Y. Zhu, C. Wang, R. Hofmann and S. Andrews, A comparison of sodium sulfite, ammonium chloride, and ascorbic acid for quenching chlorine prior to disinfection byproduct analysis, *Water Supply*, 2021, ws2021059.
- 105 M. J. Liu, B. S. Neo and W. A. Tarpeh, Building an operational framework for selective nitrogen recovery via electrochemical stripping, *Water Research*, 2020, **169**, 115226.
- 106 W. Pronk, M. Biebow and M. Boller, Electrodialysis for Recovering Salts from a Urine Solution Containing Micropollutants, *Environ. Sci. Technol.*, 2006, **40**, 2414–2420.
- 107 W. Pronk, S. Zuleeg, J. Lienert, B. Escher, M. Koller, A. Berner, G. Koch and M. Boller, Pilot experiments with electrodialysis and ozonation for the production of a fertiliser from urine, *Water Science and Technology*, 2007, **56**, 219–227.
- 108 L. Gurreri, A. Tamburini, A. Cipollina and G. Micale, Electrodialysis Applications in Wastewater Treatment for Environmental Protection and Resources Recovery: A Systematic Review on Progress and Perspectives, *Membranes*, 2020, **10**, 146.
- 109 J. De Paepe, R. E. F. Lindeboom, M. Vanoppen, K. De Paepe, D. Demey, W. Coessens, B. Lamaze, A. R. D. Verliefde, P. Clauwaert and S. E. Vlaeminck, Refinery and concentration of nutrients from urine with electrodialysis enabled by upstream precipitation and nitrification, *Water Research*, 2018, **144**, 76–86.
- 110 Y.-K. Wang, Y.-K. Geng, X.-R. Pan and G.-P. Sheng, In situ utilization of generated electricity for nutrient recovery in urine treatment using a selective electrodialysis membrane bioreactor, *Chemical Engineering Science*, 2017, **171**, 451–458.
- 111 F. Gao, L. Wang, J. Wang, H. Zhang and S. Lin, Nutrient recovery from treated wastewater by a hybrid electrochemical sequence integrating bipolar membrane electrodialysis and membrane capacitive deionization, *Environ. Sci.: Water Res. Technol.*, 2020, **6**, 383–391.

- 112 N. van Linden, G. L. Bandinu, D. A. Vermaas, H. Spanjers and J. B. van Lier, Bipolar membrane electro dialysis for energetically competitive ammonium removal and dissolved ammonia production, *Journal of Cleaner Production*, 2020, **259**, 120788.
- 113 X. Wang, Y. Wang, X. Zhang, H. Feng, C. Li and T. Xu, Phosphate Recovery from Excess Sludge by Conventional Electrodialysis (CED) and Electrodialysis with Bipolar Membranes (EDBM), *Ind. Eng. Chem. Res.*, 2013, **52**, 15896–15904.
- 114 W. Pronk, M. Biebow and M. Boller, Treatment of source-separated urine by a combination of bipolar electro dialysis and a gas transfer membrane, *Water Science and Technology*, 2006, **53**, 139–146.
- 115 European Molecular Biology Laboratory, Compound: Bezafibrate (ChEMBL264374), <https://www.ebi.ac.uk/explore/compound/ChEMBL264374>, (accessed 14 September 2025).
- 116 R. M. A. Viegas, M. L. Melo, L. C. Brandão Lima, R. R. P. Garcia, E. C. S. Filho, J. A. Osajima and O. Chiavone-Filho, Carbamazepine adsorption with a series of organoclays: removal and toxicity analyses, *Appl Water Sci*, 2024, **14**, 133.
- 117 National Center for Biotechnology Information, PubChem Compound Summary for CID 3033, Diclofenac, <https://pubchem.ncbi.nlm.nih.gov/compound/3033>, (accessed 14 September 2025).
- 118 K. Chetnik, L. Petrick and G. Pandey, MetaClean: a machine learning-based classifier for reduced false positive peak detection in untargeted LC–MS metabolomics data, *Metabolomics*, 2020, **16**, 117.
- 119 State Water Resources Control Board, 2019.
- 120 N. R. M. M. C. (Australia) Environment Protection and Heritage Council (Australia), *Australian guidelines for water recycling: managing health and environmental risks (phase 2): augmentation of drinking water supplies*, Natural Resource Management Ministerial Council : Environment Protection and Heritage Council, Canberra, 2008.
- 121 Disinfection By-Products | The Safe Water System | CDC, <https://www.cdc.gov/safewater/chlorination-byproducts.html>, (accessed 12 February 2021).
- 122 Z. Zhang, Y.-H. Chuang, A. Szczuka, K. P. Ishida, S. Roback, M. H. Plumlee and W. A. Mitch, Pilot-scale evaluation of oxidant speciation, 1,4-dioxane degradation and disinfection byproduct formation during UV/hydrogen peroxide, UV/free chlorine and UV/chloramines advanced oxidation process treatment for potable reuse, *Water Research*, 2019, **164**, 114939.
- 123 S. S. Lau, X. Wei, K. Bokenkamp, E. D. Wagner, M. J. Plewa and W. A. Mitch, Assessing Additivity of Cytotoxicity Associated with Disinfection Byproducts in Potable Reuse and Conventional Drinking Waters, *Environ. Sci. Technol.*, 2020, **54**, 5729–5736.
- 124 L. Font-Ribera, E. Marco, J. O. Grimalt, S. Pastor, R. Marcos, L. Abramsson-Zetterberg, M. Pedersen, T. Grummt, R. Junek, E. Barreiro, D. Heederik, J. Spithoven, R. Critelli, A. Naccarati, C. Schmalz, C. Zwiener, J. Liu, X. Zhang, W. Mitch, E. Gracia-Lavedan, L. Arjona, J. de Bont, L. Tarès, P. Vineis, M. Kogevinas and C. M. Villanueva, Exposure to disinfection by-products in swimming pools and biomarkers of genotoxicity and respiratory damage – The PISCINA2 Study, *Environment International*, 2019, **131**, 104988.
- 125 T. Zeng and W. A. Mitch, Impact of Nitrification on the Formation of N-Nitrosamines and Halogenated Disinfection Byproducts within Distribution System Storage Facilities, *Environ. Sci. Technol.*, 2016, **50**, 2964–2973.
- 126 T. Zeng, M. J. Plewa and W. A. Mitch, N-Nitrosamines and halogenated disinfection byproducts in U.S. Full Advanced Treatment trains for potable reuse, *Water Research*, 2016, **101**, 176–186.
- 127 L. Font-Ribera, M. Kogevinas, C. Schmalz, C. Zwiener, E. Marco, J. O. Grimalt, J. Liu, X. Zhang, W. Mitch, R. Critelli, A. Naccarati, D. Heederik, J. Spithoven, L. Arjona, J. de Bont, E. Gracia-Lavedan and C. M. Villanueva, Environmental and personal determinants of the uptake of disinfection by-products during swimming, *Environmental Research*, 2016, **149**, 206–215.
- 128 A. Küster, A. C. Alder, B. I. Escher, K. Duis, K. Fenner, J. Garric, T. H. Hutchinson, D. R. Lapen, A. Péry, J. Römbke, J. Snape, T. Ternes, E. Topp, A. Wehrhan and T. Knacker, Environmental risk assessment of human pharmaceuticals in the European Union: A case study with the  $\beta$ -blocker atenolol, *Integrated Environmental Assessment and Management*, 2010, **6**, 514–523.
- 129 Environmental Protection Agency, 2025.

- 130 Drug Discovery and Chemical Biology Biocenter Finland, DrugMapper, [https://drugmapper.helsinki.fi/CompoundInfo?compound\\_id=2127933](https://drugmapper.helsinki.fi/CompoundInfo?compound_id=2127933), (accessed 14 March 2026).
- 131 C. Tixier, H. P. Singer, S. Oellers and S. R. Müller, Occurrence and Fate of Carbamazepine, Clofibrac Acid, Diclofenac, Ibuprofen, Ketoprofen, and Naproxen in Surface Waters, *Environ. Sci. Technol.*, 2003, **37**, 1061–1068.
- 132 R. Pärnamäe, S. Mareev, V. Nikonenko, S. Melnikov, N. Sheldeshov, V. Zabolotskii, H. V. M. Hamelers and M. Tedesco, Bipolar membranes: A review on principles, latest developments, and applications, *Journal of Membrane Science*, 2021, **617**, 118538.
- 133 R. Wódzki and J. Nowaczyk, Membrane transport of organics. III. Permeation of some carboxylic acids through bipolar polymer membrane, *Journal of Applied Polymer Science*, 2001, **80**, 2705–2717.
- 134 T. Bond, E. H. Goslan, S. A. Parsons and B. Jefferson, Treatment of disinfection by-product precursors, *Environmental Technology*, 2011, **32**, 1–25.
- 135 K. M. Udert, T. A. Larsen and W. Gujer, Fate of major compounds in source-separated urine, *Water Science and Technology*, 2006, **54**, 413–420.
- 136 A. D. Shah and W. A. Mitch, Halonitroalkanes, Halonitriles, Haloamides, and N-Nitrosamines: A Critical Review of Nitrogenous Disinfection Byproduct Formation Pathways, *Environ. Sci. Technol.*, 2012, **46**, 119–131.
- 137 A. C. Diehl, G. E. Speitel Jr., J. M. Symons, S. W. Krasner, C. J. Hwang and S. E. Barrett, DBP formation during chloramination, *Journal AWWA*, 2000, **92**, 76–90.
- 138 G. Hua and D. A. Reckhow, Comparison of disinfection byproduct formation from chlorine and alternative disinfectants, *Water Research*, 2007, **41**, 1667–1678.
- 139 Y.-H. Chuang, A. Szczuka and W. A. Mitch, Comparison of Toxicity-Weighted Disinfection Byproduct Concentrations in Potable Reuse Waters and Conventional Drinking Waters as a New Approach to Assessing the Quality of Advanced Treatment Train Waters, *Environ. Sci. Technol.*, 2019, **53**, 3729–3738.
- 140 Y. Chen, J. A. Wrubel, W. E. Klein, S. Kabir, W. A. Smith, K. C. Neyerlin and T. G. Deutsch, High-Performance Bipolar Membrane Development for Improved Water Dissociation, *ACS Appl Polym Mater*, 2020, **2**, 4559–4569.
- 141 Fuel Cell Store, .
- 142 G. Mohandass, W. Chen, S. Krishnan and T. Kim, Asymmetric and Symmetric Redox Flow Batteries for Energy-Efficient, High-Recovery Water Desalination, *Environ. Sci. Technol.*, 2022, **56**, 4477–4488.
- 143 A. Xie and S. C. Popat, Electrochemical ammonia stripping from non-nitrified animal rendering wastewater, *Chemical Engineering Journal Advances*, 2020, **3**, 100020.
